# Supplementary material
Source: publisher figshare collection journal article supplement (https://acs.figshare.com/ndownloader/files/34748059)

---

# Supporting Information

## I<sub>2</sub>-DMSO Mediated N-H/ $\alpha$ -C(sp<sup>3</sup>)-H Difunctionalization of Tetrahydroisoquinoline: Formal [2+2+1] Annulation for the Construction of Pyrrolo [2,1-*a*]isoquinoline Derivatives

*Shi-Yi Zhuang,<sup>a</sup> Yong-Xing Tang,<sup>a</sup> Jin-Yi Liu,<sup>a</sup> Xiang-Long Chen,<sup>a</sup> Jin-Tian Ma,<sup>a</sup> Yan-Dong Wu,<sup>a</sup> Kai-Lu Zheng<sup>b,\*</sup> and An-Xin Wu<sup>a,\*</sup>*

*<sup>a</sup>Key Laboratory of Pesticide & Chemical Biology, Ministry of Education, College of Chemistry, Central China Normal University, Wuhan 430079, P. R. China.*

*<sup>b</sup>Guangdong Provincial Key Laboratory of Research and Development of Natural Drugs, School of Pharmacy, Guangdong Medical University, Dongguan 523808, P.R. China.*

E-mail: chwuax@mail.ccnu.edu.cn

E-mail:kailuzheng@163.com

### Contents

|                                                                   |         |
|-------------------------------------------------------------------|---------|
| 1. General.....                                                   | S2      |
| 2. Experimental procedures.....                                   | S3      |
| 3. The crystallographic data.....                                 | S4      |
| 4. Spectroscopic data.....                                        | S6-S20  |
| 5. Copies of <sup>1</sup> H NMR, <sup>13</sup> C NMR spectra..... | S21-S54 |

---

## 1. General

All of the substrates and reagents were commercially available and used without further purification. TLC analysis was performed using pre-coated glass plates. Flash column chromatography was performed on silica gel (200–300 mesh).  $^1\text{H}$  NMR spectra were determined at 25 °C on a Varian Mercury 600 MHz spectrometer. Chemical shifts were provided in ppm relative to the internal standard of tetramethylsilane (TMS).  $^{13}\text{C}$  spectra were recorded in  $\text{CDCl}_3$  or  $\text{DMSO-}d_6$  on 150 MHz NMR spectrometers and resonances ( $\delta$ ) in ppm. The data is being reported as s = singlet, d = doublet, t = triplet, m = multiplet or unresolved coupling constant(s) in Hz, integration. HRMS were obtained on Thermo Scientific Q Exactive equipped with an electron spray ionization source. Melting points were determined by using an electrothermal capillary melting point apparatus and not corrected. The X-ray crystal-structures were obtained on a Bruker APEX DUO CCD system.

---

## 2. Experimental procedures

### General procedure for the synthesis of **3** and **4** (1 mmol scale of **3a** as an example)

A sealed tube equipped with a magnetic stirring bar was charged with acetophenone (**1a**) (120.0 mg, 1.0 mmol), iodine (254.0 mg, 1.0 mmol) at room temperature, and DMSO (3 mL) was added. The resulting mixture was stirred at 130 °C (heating block) for 1 h. Then 1,2,3,4-tetrahydroisoquinoline (**2a**) (133.0 mg, 1.0 mmol) was added at 130 °C (heating block) to react for 4 h. After the reaction completed, the mixture was quenched with saturation Na<sub>2</sub>S<sub>2</sub>O<sub>3</sub> solution (100 mL), extracted with EtOAc (3 × 100 mL). The combined organic layers were washed with brine, dried over anhydrous Na<sub>2</sub>SO<sub>4</sub> and concentrated under reduced pressure. The residue was purified by column chromatography on silica gel (petroleum ether/EtOAc = 2:1) to yield the desired product **3a** (243.0 mg, yield 64%) as yellow solid (R<sub>f</sub> = 0.3).

### 3. The crystallographic data

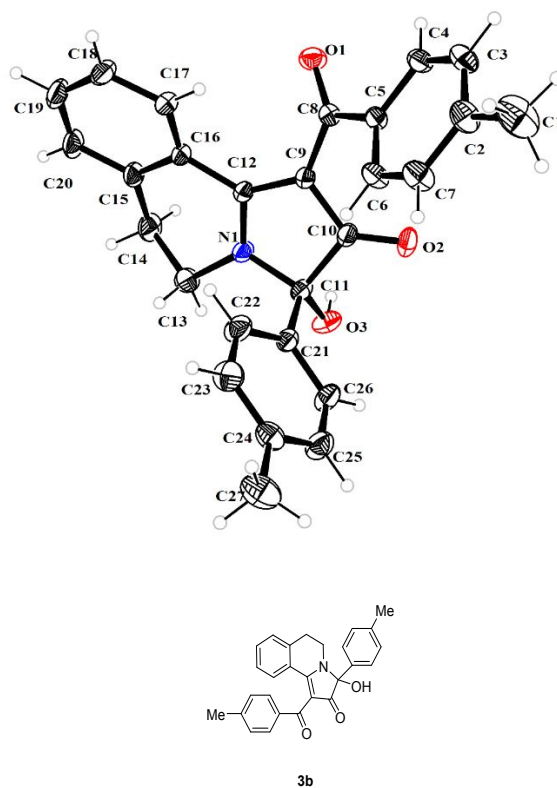

**Figure S1.** X-ray crystal structure of **3b** ORTEP (30%) drawing

Crystal Data for Compound **3b**: CCDC 2094616 contains the supplementary crystallographic data for this paper. These data can be obtained free of charge from The Cambridge Crystallographic.

Sample preparation: In a 10 mL glass bottle, 15 mg of pure **3b** was completely dissolved in the mixed solvent of 3 mL  $\text{CHCl}_3$ , and then 2 mL of n-hexane was added slowly. After a week of solvent evaporation, some yellow transparent crystals were obtained. The crystals were mounted on a glass fiber for diffraction experiments. Intensity data were collected on a Bruker SMART APEX CCD diffractometer with Mo  $K\alpha$  radiation (0.71073 Å) at room temperature.

---

Bond precision: C-C = 0.0021 Å

Wavelength=0.71073

Cell: a=10.3782(18) b=10.9639(19) c=11.464(2)  
alpha=117.539(2) beta=106.494(2) gamma=94.119(3)

Temperature: 296 K

|                        | Calculated   | Reported     |
|------------------------|--------------|--------------|
| Volume                 | 1076.9(3)    | 1077.0(3)    |
| Space group            | P -1         | P -1         |
| Hall group             | -P 1         | -P 1         |
| Moiety formula         | C27 H23 N O3 | C27 H23 N O3 |
| Sum formula            | C27 H23 N O3 | C27 H23 N O3 |
| Mr                     | 409.46       | 409.46       |
| Dx, g cm <sup>-3</sup> | 1.263        | 1.263        |
| Z                      | 2            | 2            |
| Mu (mm <sup>-1</sup> ) | 0.082        | 0.082        |
| F000                   | 432.0        | 432.0        |
| F000'                  | 432.19       |              |
| h,k,lmax               | 15,16,17     | 15,15,17     |
| Nref                   | 7512         | 6717         |
| Tmin,Tmax              | 0.981,0.984  | 0.661,0.746  |
| Tmin'                  | 0.976        |              |

Correction method= # Reported T Limits: Tmin=0.661 Tmax=0.746

AbsCorr = MULTI-SCAN

Data completeness= 0.894

Theta(max)= 32.044

R(reflections)= 0.0509( 5089)

wR2(reflections)= 0.1654( 6717)

S = 1.027

Npar= 283

## 4. Spectroscopic data

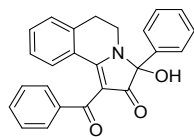

**3a**

### 1-benzoyl-3-hydroxy-3-phenyl-5,6-dihydropyrrolo [2,1-*a*]isoquinolin-2(3*H*)-one (**3a**)

Prepared according to the **1a** (1.0 equiv, 0.5 mmol, 60.0 mg),  $I_2$  (1.0 equiv, 0.5 mmol, 127.0 mg) at room temperature, and DMSO (2 mL) was added. The resulting mixture was stirred at 130 °C (heating block) for 1h. Then **2a** (1.0 equiv, 0.5 mmol, 67.5 mg) was added at 130 °C (heating block) to react for 4h. Purification by column chromatography on silica gel using petroleum ether/ethyl acetate (2:1 v/v) as eluent afforded **3a** (133.4 mg, yield 70%) as yellow solid ( $R_f$  = 0.3); mp 200–202 °C;  $^1H$  NMR (600 MHz, DMSO- $d_6$ )  $\delta$  7.72 (d,  $J$  = 6.0 Hz, 3H), 7.67 (s, 1H), 7.60–7.57 (m, 1H), 7.53–7.50 (m, 1H), 7.46 (s, 3H), 7.43–7.36 (m, 5H), 7.32 (d,  $J$  = 7.2 Hz, 1H), 3.52–3.48 (m, 1H), 3.17–3.10 (m, 2H), 3.09–3.04 (m, 1H);  $^{13}C$  NMR (150 MHz, DMSO- $d_6$ )  $\delta$  194.3, 189.8, 170.6, 139.2, 138.0, 136.2, 133.6, 132.2, 130.9, 129.4, 128.8, 128.7, 127.9, 126.7, 125.5, 124.1, 103.1, 90.8, 37.1, 27.7; HRMS (ESI)  $m/z$ :  $[M+H]^+$  Calcd for  $C_{25}H_{20}NO_3^+$  382.14377; Found 382.14337.

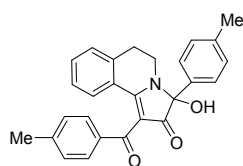

**3b**

### 3-hydroxy-1-(4-methylbenzoyl)-3-(*p*-tolyl)-5,6-dihydropyrrolo [2,1-*a*]isoquinolin-2(3*H*)-one (**3b**)

Prepared according to the **1b** (1.0 equiv, 0.5 mmol, 67.0 mg),  $I_2$  (1.0 equiv, 0.5 mmol, 127.0 mg) at room temperature, and DMSO (2 mL) was added. The resulting mixture was stirred at 130 °C (heating block) for 1 h. Then **2a** (1.0 equiv, 0.5 mmol, 67.5 mg) was added at 130 °C (heating block) to react for 4 h. Purification by column chromatography on silica gel using petroleum ether/ethyl acetate (2:1 v/v) as eluent afforded **3b** (139.2 mg yield 68%) as yellow solid ( $R_f$  = 0.3); mp 219–220 °C;  $^1H$  NMR (600 MHz, DMSO- $d_6$ )  $\delta$  7.69 (d,  $J$  = 8.4 Hz, 1H), 7.64 (d,  $J$  = 7.8 Hz, 2H), 7.58 (d,  $J$  = 7.2 Hz, 1H), 7.56 (s, 1H), 7.45 (d,  $J$  = 7.8 Hz, 1H), 7.34 (d,  $J$  = 7.8 Hz, 2H), 7.30 (d,  $J$  = 7.8 Hz, 1H), 7.24–7.19 (m, 4H), 3.50–3.44 (m, 1H), 3.16–3.12 (m, 1H), 3.12–3.07 (m, 1H), 3.07–3.02 (m, 1H), 2.34 (s, 3H), 2.30 (s, 3H);  $^{13}C$  NMR (150 MHz, DMSO- $d_6$ )  $\delta$  194.4, 189.6, 170.1, 142.4, 137.9, 136.6, 133.4, 130.8, 129.6, 129.3, 128.6, 128.5, 126.6, 125.4, 124.2, 103.3, 90.7, 37.0, 27.8, 21.2, 20.7; HRMS (ESI)  $m/z$ :  $[M+H]^+$  Calcd for  $C_{27}H_{24}NO_3^+$  410.17507; Found 410.17484.

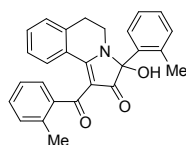

**3c**

### 3-hydroxy-1-(2-methylbenzoyl)-3-(*o*-tolyl)-5,6-dihydropyrrolo [2,1-*a*]isoquinolin-2(3*H*)-one (**3c**)

Prepared according to the **1c** (1.0 equiv, 0.5 mmol, 67.0 mg), I<sub>2</sub> (1.0 equiv, 0.5 mmol, 127.0 mg) at room temperature, and DMSO (2 mL) was added. The resulting mixture was stirred at 130 °C (heating block) for 1 h. Then **2a** (1.0 equiv, 0.5 mmol, 67.5 mg) was added at 130 °C (heating block) to react for 4 h. Purification by column chromatography on silica gel using petroleum ether/ethyl acetate (2:1 v/v) as eluent afforded **3c** (118.8 mg, yield 58%) as yellow solid (R<sub>f</sub> = 0.3); mp 215–217 °C; <sup>1</sup>H NMR (600 MHz, DMSO-*d*<sub>6</sub>) δ 8.03 (d, *J* = 7.8 Hz, 1H), 7.75 (s, 1H), 7.64 (s, 1H), 7.60 (t, *J* = 7.2 Hz, 1H), 7.44 (d, *J* = 7.2 Hz, 1H), 7.37 (t, *J* = 7.8 Hz, 2H), 7.31–7.23 (m, 3H), 7.19 (d, *J* = 7.2 Hz, 1H), 7.17–7.08 (m, 2H), 3.50–3.43 (m, 1H), 3.12–3.01 (m, 2H), 2.99–2.92 (m, 1H), 2.33 (s, 3H), 2.17 (s, 3H); <sup>13</sup>C NMR (150 MHz, DMSO-*d*<sub>6</sub>) δ 194.4, 190.7, 170.7, 141.4, 137.8, 135.6, 135.3, 134.1, 133.8, 131.7, 131.6, 131.3, 130.3, 129.3, 128.8, 128.31, 128.29, 126.5, 125.8, 125.0, 124.4, 37.2, 27.7, 19.6, 15.3; HRMS (ESI) *m/z*: [M+H]<sup>+</sup> Calcd for C<sub>27</sub>H<sub>24</sub>NO<sub>3</sub><sup>+</sup> 410.17507; Found 410.17520.

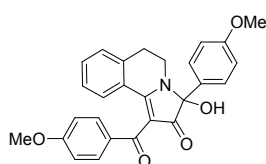

**3d**

3-hydroxy-1-(4-methoxybenzoyl)-3-(4-methoxyphenyl)-5,6-dihydropyrrolo [2,1-*a*]isoquinolin-2(3*H*)-one (**3d**)

Prepared according to the **1d** (1.0 equiv, 0.5 mmol, 75.0 mg), I<sub>2</sub> (1.0 equiv, 0.5 mmol, 127.0 mg) at room temperature, and DMSO (2 mL) was added. The resulting mixture was stirred at 130 °C (heating block) for 1 h. Then **2a** (1.0 equiv, 0.5 mmol, 67.5 mg) was added at 130 °C (heating block) to react for 4 h. Purification by column chromatography on silica gel using petroleum ether/ethyl acetate (1:1 v/v) as eluent afforded **3d** (112.6 mg, yield 51%) as yellow solid (R<sub>f</sub> = 0.28); mp 222–224 °C; <sup>1</sup>H NMR (600 MHz, DMSO-*d*<sub>6</sub>) δ 7.73 (d, *J* = 8.4 Hz, 2H), 7.64 (d, *J* = 8.4 Hz, 1H), 7.57 (t, *J* = 7.2 Hz, 1H), 7.50 (s, 1H), 7.46 (d, *J* = 7.2 Hz, 1H), 7.36 (d, *J* = 8.4 Hz, 2H), 7.31 (t, *J* = 7.2 Hz, 1H), 6.96 (t, *J* = 8.4 Hz, 4H), 3.81 (s, 3H), 3.75 (s, 3H), 3.49–3.45 (m, 1H), 3.16–3.13 (m, 1H), 3.12–3.08 (m, 1H), 3.08–3.03 (m, 1H); <sup>13</sup>C NMR (150 MHz, DMSO-*d*<sub>6</sub>) δ 194.5, 188.7, 169.8, 162.6, 159.4, 137.9, 133.3, 131.7, 130.6, 128.6, 128.3, 126.8, 126.6, 124.2, 114.0, 113.2, 103.3, 90.5, 55.4, 55.1, 37.0, 27.8; HRMS (ESI) *m/z*: [M+H]<sup>+</sup> Calcd for C<sub>27</sub>H<sub>24</sub>NO<sub>5</sub><sup>+</sup> 442.16490; Found 442.16537.

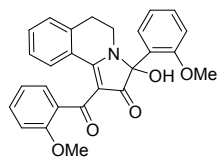

**3e**

3-hydroxy-1-(2-methoxybenzoyl)-3-(2-methoxyphenyl)-5,6-dihydropyrrolo [2,1-*a*]isoquinolin-2(3*H*)-one (**3e**)

Prepared according to the **1e** (1.0 equiv, 0.5 mmol, 75.0 mg), I<sub>2</sub> (1.0 equiv, 0.5 mmol, 127.0 mg) at room temperature, and DMSO (2 mL) was added. The resulting mixture was stirred at 130 °C (heating block) for 1 h. Then **2a** (1.0 equiv, 0.5 mmol, 67.5 mg) was added at 130 °C (heating block) to react for 4 h. Purification by column chromatography on silica gel using petroleum ether/ethyl

acetate (1:1 v/v) as eluent afforded **3e** (99.3 mg, yield 45%) as yellow solid ( $R_f = 0.3$ ); mp 202–203 °C;  $^1\text{H}$  NMR (600 MHz,  $\text{DMSO}-d_6$ )  $\delta$  8.11 (s, 1H), 7.77 (s, 1H), 7.55–7.51 (m, 1H), 7.45 (s, 1H), 7.40–7.29 (m, 4H), 7.28–7.23 (m, 1H), 7.01 (t,  $J = 7.2$  Hz, 1H), 6.95 (t,  $J = 7.2$  Hz, 2H), 6.91–6.84 (m, 1H), 3.67 (s, 3H), 3.56 (s, 3H), 3.43–3.38 (m, 1H), 3.03–2.96 (m, 1H), 2.92–2.86 (m, 1H), 2.74–2.65 (m, 1H);  $^{13}\text{C}$  NMR (150 MHz,  $\text{DMSO}-d_6$ )  $\delta$  194.4, 187.2, 170.0, 157.1, 156.1, 137.6, 133.1, 132.3, 131.3, 130.4, 130.2, 129.0, 128.8, 128.0, 126.2, 125.0, 124.4, 120.1, 119.6, 111.4, 111.2, 105.7, 87.7, 79.2, 55.6, 55.5, 37.2, 27.9; HRMS (ESI)  $m/z$ :  $[\text{M}+\text{H}]^+$  Calcd for  $\text{C}_{27}\text{H}_{24}\text{NO}_5^+$  442.16490; Found 442.16479.

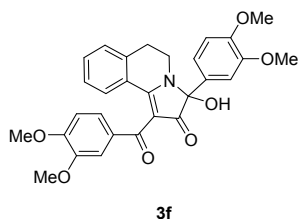

1-(3,4-dimethoxybenzoyl)-3-(3,4-dimethoxyphenyl)-3-hydroxy-5,6-dihydropyrrolo [2,1-*a*]isoquinolin-2(3*H*)-one (**3f**)

Prepared according to the **1f** (1.0 equiv, 0.5 mmol, 90.0 mg),  $\text{I}_2$  (1.0 equiv, 0.5 mmol, 127.0 mg) at room temperature, and DMSO (2 mL) was added. The resulting mixture was stirred at 130 °C (heating block) for 1 h. Then **2a** (1.0 equiv, 0.5 mmol, 67.5 mg) was added at 130 °C (heating block) to react for 4 h. Purification by column chromatography on silica gel using petroleum ether/ethyl acetate (1:2 v/v) as eluent afforded **3f** (120.4 mg, yield 48%) as yellow solid ( $R_f = 0.35$ ); mp 216–218 °C;  $^1\text{H}$  NMR (600 MHz,  $\text{DMSO}-d_6$ )  $\delta$  7.63 (d,  $J = 7.2$  Hz, 1H), 7.57 (t,  $J = 7.2$  Hz, 1H), 7.53 (s, 1H), 7.46 (d,  $J = 7.2$  Hz, 1H), 7.40 (d,  $J = 7.8$  Hz, 1H), 7.31 (s, 2H), 7.06 (s, 1H), 6.97 (d,  $J = 8.4$  Hz, 2H), 6.92 (d,  $J = 7.8$  Hz, 1H), 3.81 (s, 3H), 3.75 (s, 6H), 3.70 (s, 3H), 3.50–3.45 (m, 1H), 3.21–3.15 (m, 1H), 3.14–3.09 (m, 1H), 3.09–3.03 (m, 1H);  $^{13}\text{C}$  NMR (150 MHz,  $\text{DMSO}-d_6$ )  $\delta$  194.6, 189.0, 169.4, 152.5, 149.0, 148.8, 148.1, 137.9, 133.3, 131.6, 130.6, 130.5, 128.8, 128.7, 126.7, 124.3, 124.2, 117.5, 111.8, 110.5, 109.3, 103.3, 90.4, 55.7, 55.6, 55.5, 55.3, 37.0, 27.8; HRMS (ESI)  $m/z$ :  $[\text{M}+\text{H}]^+$  Calcd for  $\text{C}_{29}\text{H}_{28}\text{NO}_7^+$  502.18603; Found 502.18646.

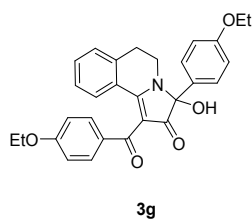

1-(4-ethoxybenzoyl)-3-(4-ethoxyphenyl)-3-hydroxy-5,6-dihydropyrrolo [2,1-*a*]isoquinolin-2(3*H*)-one (**3g**)

Prepared according to the **1g** (1.0 equiv, 0.5 mmol, 82.0 mg),  $\text{I}_2$  (1.0 equiv, 0.5 mmol, 127.0 mg) at room temperature, and DMSO (2 mL) was added. The resulting mixture was stirred at 130 °C (heating block) for 1 h. Then **2a** (1.0 equiv, 0.5 mmol, 67.5 mg) was added at 130 °C (heating block) to react for 4 h. Purification by column chromatography on silica gel using petroleum ether/ethyl acetate (1:1 v/v) as eluent afforded **3g** (117.4 mg, yield 50%) as yellow solid ( $R_f = 0.3$ ); mp 208–210 °C;  $^1\text{H}$  NMR (600 MHz,  $\text{DMSO}-d_6$ )  $\delta$  7.72 (d,  $J = 9.0$  Hz, 2H), 7.64 (d,  $J = 7.8$  Hz, 1H), 7.56



(t,  $J = 7.2$  Hz, 1H), 7.50 (s, 1H), 7.45 (d,  $J = 7.8$  Hz, 1H), 7.35 (d,  $J = 8.4$  Hz, 2H), 7.31 (t,  $J = 7.8$  Hz, 1H), 6.94 (t,  $J = 9.0$  Hz, 4H), 4.11–4.06 (m, 2H), 4.04–3.99 (m, 2H), 3.49–3.44 (m, 1H), 3.17–3.12 (m, 1H), 3.12–3.08 (m, 1H), 3.07–3.03 (m, 1H), 1.36–1.32 (m, 3H), 1.32–1.28 (m, 3H);  $^{13}\text{C}$  NMR (150 MHz, DMSO- $d_6$ )  $\delta$  194.6, 188.7, 169.8, 162.0, 158.7, 137.9, 133.3, 131.8, 131.6, 130.7, 128.6, 128.2, 128.1, 126.8, 126.6, 124.2, 114.5, 113.6, 103.3, 90.5, 63.4, 63.1, 37.0, 27.8, 14.7, 14.6; HRMS (ESI)  $m/z$ :  $[\text{M}+\text{H}]^+$  Calcd for  $\text{C}_{29}\text{H}_{28}\text{NO}_5^+$  470.19620; Found 470.19675.

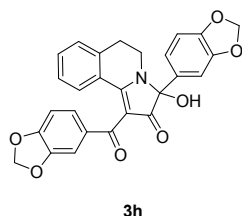

3-(benzo[*d*][1,3]dioxol-5-yl)-1-(benzo[*d*][1,3]dioxole-5-carbonyl)-3-hydroxy-5,6-dihydropyrrolo [2,1-*a*]isoquinolin-2(3*H*)-one (**3h**)

Prepared according to the **1h** (1.0 equiv, 0.5 mmol, 82.0 mg), **I<sub>2</sub>** (1.0 equiv, 0.5 mmol, 127.0 mg) at room temperature, and DMSO (2 mL) was added. The resulting mixture was stirred at 130 °C (heating block) for 1 h. Then **2a** (1.0 equiv, 0.5 mmol, 67.5 mg) was added at 130 °C (heating block) to react for 4 h. Purification by column chromatography on silica gel using petroleum ether/ethyl acetate (1:1 v/v) as eluent afforded **3h** (129.1 mg, yield 55%) as yellow solid ( $R_f = 0.35$ ); mp 205–207 °C;  $^1\text{H}$  NMR (600 MHz, DMSO- $d_6$ )  $\delta$  7.63 (d,  $J = 7.8$  Hz, 1H), 7.57 (t,  $J = 7.2$  Hz, 2H), 7.46 (d,  $J = 7.8$  Hz, 1H), 7.38 (d,  $J = 8.4$  Hz, 1H), 7.32 (t,  $J = 7.2$  Hz, 1H), 7.24 (s, 1H), 6.98–6.94 (m, 2H), 6.94–6.89 (m, 2H), 6.10 (d,  $J = 4.8$  Hz, 2H), 6.03 (s, 2H), 3.49–3.44 (m, 1H), 3.21–3.16 (m, 1H), 3.15–3.10 (m, 1H), 3.07–3.02 (m, 1H);  $^{13}\text{C}$  NMR (150 MHz, DMSO- $d_6$ )  $\delta$  194.2, 188.4, 169.9, 150.8, 147.6, 147.5, 147.1, 137.9, 133.6, 133.4, 130.7, 130.2, 128.7, 126.7, 125.7, 124.1, 119.0, 109.6, 109.0, 108.3, 107.6, 106.1, 103.1, 101.8, 101.3, 90.3, 37.0, 27.7; HRMS (ESI)  $m/z$ :  $[\text{M}+\text{H}]^+$  Calcd for  $\text{C}_{27}\text{H}_{20}\text{NO}_7^+$  470.12343; Found 470.12387.

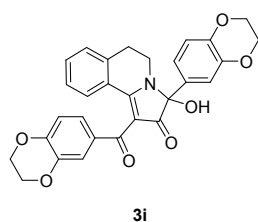

3-(2,3-dihydrobenzo[*b*][1,4]dioxin-6-yl)-1-(2,3-dihydrobenzo[*b*][1,4]dioxine-6-carbonyl)-3-hydroxy-5,6-dihydropyrrolo [2,1-*a*]isoquinolin-2(3*H*)-one (**3i**)

Prepared according to the **1i** (1.0 equiv, 0.5 mmol, 89.0 mg), **I<sub>2</sub>** (1.0 equiv, 0.5 mmol, 127.0 mg) at room temperature, and DMSO (2 mL) was added. The resulting mixture was stirred at 130 °C (heating block) for 1 h. Then **2a** (1.0 equiv, 0.5 mmol, 67.5 mg) was added at 130 °C (heating block) to react for 4 h. Purification by column chromatography on silica gel using petroleum ether/ethyl acetate (1:1 v/v) as eluent afforded **3i** (136.8 mg, yield 55%) as yellow oil yellow solid ( $R_f = 0.33$ );  $^1\text{H}$  NMR (600 MHz, DMSO- $d_6$ )  $\delta$  7.62 (d,  $J = 7.8$  Hz, 1H), 7.56 (t,  $J = 7.2$  Hz, 1H), 7.52 (s, 1H), 7.45 (d,  $J = 7.2$  Hz, 1H), 7.30 (t,  $J = 7.8$  Hz, 3H), 7.27 (s, 1H), 6.95 (s, 1H), 6.88 (t,  $J = 7.8$  Hz, 2H), 6.83 (d,  $J = 8.4$  Hz, 1H), 6.83 (d,  $J = 8.4$  Hz, 1H), 4.29 (s, 2H), 4.24 (s, 6H), 3.49–3.44 (m, 1H),

3.17–3.12 (m, 1H), 3.10–3.02 (m, 2H);  $^{13}\text{C}$  NMR (150 MHz, DMSO- $d_6$ )  $\delta$  194.3, 188.7, 169.8, 147.3, 143.6, 143.4, 142.6, 137.8, 133.3, 132.5, 130.6, 129.3, 128.7, 126.7, 124.1, 123.3, 118.7, 118.0, 117.3, 116.5, 114.6, 103.2, 90.2, 64.5, 64.1, 63.9, 37.0, 27.8; HRMS (ESI)  $m/z$ :  $[\text{M}+\text{H}]^+$  Calcd for  $\text{C}_{29}\text{H}_{24}\text{NO}_7^+$  498.15473; Found 498.15485.

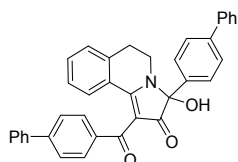

**3j**

1-([1,1'-biphenyl]-4-carbonyl)-3-([1,1'-biphenyl]-4-yl)-3-hydroxy-5,6-dihydropyrrolo[2,1-*a*]isoquinolin-2(3*H*)-one (**3j**)

Prepared according to the **1j** (1.0 equiv, 0.5 mmol, 98.0 mg),  $\text{I}_2$  (1.0 equiv, 0.5 mmol, 127.0 mg) at room temperature, and DMSO (2 mL) was added. The resulting mixture was stirred at 130 °C (heating block) for 1 h. Then **2a** (1.0 equiv, 0.5 mmol, 67.5 mg) was added at 130 °C (heating block) to react for 4 h. Purification by column chromatography on silica gel using petroleum ether/ethyl acetate (2:1 v/v) as eluent afforded **3j** (160.1 mg, yield 60%) as yellow solid ( $R_f$  = 0.3); mp 161–163 °C;  $^1\text{H}$  NMR (600 MHz, DMSO- $d_6$ )  $\delta$  7.87 (d,  $J$  = 7.2 Hz, 2H), 7.84–7.75 (m, 3H), 7.73 (d,  $J$  = 5.4 Hz, 5H), 7.67 (d,  $J$  = 6.6 Hz, 2H), 7.59 (t,  $J$  = 7.8 Hz, 3H), 7.48 (d,  $J$  = 6.6 Hz, 5H), 7.43–7.33 (m, 3H), 3.60–3.52 (m, 1H), 3.27–3.20 (m, 1H), 3.19–3.06 (m, 2H);  $^{13}\text{C}$  NMR (150 MHz, DMSO- $d_6$ )  $\delta$  194.3, 189.4, 170.6, 143.7, 140.4, 139.6, 139.3, 138.0, 138.0, 135.3, 133.6, 130.9, 130.2, 129.0, 129.0, 128.7, 128.1, 127.7, 127.1, 126.9, 126.7, 126.2, 124.1, 103.3, 90.8, 37.2, 27.8; HRMS (ESI)  $m/z$ :  $[\text{M}+\text{H}]^+$  Calcd for  $\text{C}_{37}\text{H}_{28}\text{NO}_3^+$  534.20637; Found 534.20660.

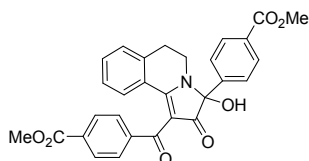

**3k**

methyl 14-(3-hydroxy-1-(4-(methoxycarbonyl)benzoyl)-2-oxo-2,3,5,6-tetrahydropyrrolo[2,1-*a*]isoquinolin-3-yl)benzoate (**3k**)

Prepared according to the **1k** (1.0 equiv, 0.5 mmol, 89.0 mg),  $\text{I}_2$  (1.0 equiv, 0.5 mmol, 127.0 mg) at room temperature, and DMSO (2 mL) was added. The resulting mixture was stirred at 130 °C (heating block) for 1 h. Then **2a** (1.0 equiv, 0.5 mmol, 67.5 mg) was added at 130 °C (heating block) to react for 4 h. Purification by column chromatography on silica gel using petroleum ether/ethyl acetate (1:1 v/v) as eluent afforded **3k** (129.4 mg, yield 52%) as yellow solid ( $R_f$  = 0.35); mp 223–225 °C;  $^1\text{H}$  NMR (600 MHz, DMSO- $d_6$ )  $\delta$  8.01 (d,  $J$  = 7.8 Hz, 2H), 7.97 (d,  $J$  = 7.8 Hz, 2H), 7.91 (s, 1H), 7.85 (d,  $J$  = 7.8 Hz, 1H), 7.78 (d,  $J$  = 7.8 Hz, 2H), 7.62 (d,  $J$  = 7.8 Hz, 3H), 7.49 (d,  $J$  = 7.2 Hz, 1H), 7.35 (t,  $J$  = 7.2 Hz, 1H), 3.87 (s, 3H), 3.86 (s, 3H), 3.57–3.48 (m, 1H), 3.25–3.18 (m, 1H), 3.18–3.13 (m, 1H), 3.11–3.02 (m, 1H);  $^{13}\text{C}$  NMR (150 MHz, DMSO- $d_6$ )  $\delta$  193.7, 188.7, 171.3, 165.8, 143.4, 141.1, 138.1, 133.9, 132.0, 131.2, 129.9, 129.7, 129.3, 128.7, 128.6, 126.7, 126.1, 123.9,

103.4, 102.9, 90.6, 52.4, 52.2, 37.3, 27.6; HRMS (ESI)  $m/z$ :  $[M+H]^+$  Calcd for  $C_{29}H_{24}NO_7^+$  498.15473; Found 498.15491.

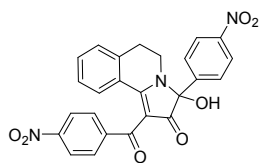

**3l**

3-hydroxy-1-(4-nitrobenzoyl)-3-(4-nitrophenyl)-5,6-dihydropyrrolo[2,1-*a*]isoquinolin-2(3*H*)-one (**3l**)

Prepared according to the **1l** (1.0 equiv, 0.5 mmol, 82.5 mg),  $I_2$  (1.0 equiv, 0.5 mmol, 127.0 mg) at room temperature, and DMSO (2 mL) was added. The resulting mixture was stirred at 130 °C (heating block) for 1 h. Then **2a** (1.0 equiv, 0.5 mmol, 67.5 mg) was added at 130 °C (heating block) to react for 4 h. Purification by column chromatography on silica gel using petroleum ether/ethyl acetate (1:1 v/v) as eluent afforded **3l** (134.4 mg, yield 57%) as yellow solid ( $R_f$  = 0.28); mp 205–207 °C;  $^1H$  NMR (600 MHz, DMSO- $d_6$ )  $\delta$  8.26 (t,  $J$  = 9.0 Hz, 4H), 8.11 (s, 1H), 7.95 (d,  $J$  = 7.8 Hz, 1H), 7.86 (d,  $J$  = 8.4 Hz, 2H), 7.76 (d,  $J$  = 9.0 Hz, 2H), 7.65 (t,  $J$  = 7.2 Hz, 1H), 7.51 (d,  $J$  = 7.8 Hz, 1H), 7.39 (t,  $J$  = 7.2 Hz, 1H), 3.58–3.53 (m, 1H), 3.27–3.22 (m, 1H), 3.21–3.16 (m, 1H), 3.11–3.05 (m, 1H);  $^{13}C$  NMR (150 MHz, DMSO- $d_6$ )  $\delta$  193.3, 187.6, 171.8, 149.0, 147.8, 145.0, 142.9, 138.2, 134.3, 131.5, 131.4, 130.2, 128.6, 127.3, 126.7, 124.0, 123.1, 102.7, 90.4, 37.4, 27.6; HRMS (ESI)  $m/z$ :  $[M+H]^+$  Calcd for  $C_{25}H_{18}N_3O_7^+$  472.11393; Found 472.11411.

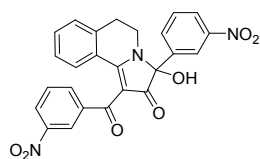

**3m**

3-hydroxy-1-(3-nitrobenzoyl)-3-(3-nitrophenyl)-5,6-dihydropyrrolo[2,1-*a*]isoquinolin-2(3*H*)-one (**3m**)

Prepared according to the **1m** (1.0 equiv, 0.5 mmol, 82.5 mg),  $I_2$  (1.0 equiv, 0.5 mmol, 127.0 mg) at room temperature, and DMSO (2 mL) was added. The resulting mixture was stirred at 130 °C (heating block) for 1 h. Then **2a** (1.0 equiv, 0.5 mmol, 67.5 mg) was added at 130 °C (heating block) to react for 4 h. Purification by column chromatography on silica gel using petroleum ether/ethyl acetate (1:1 v/v) as eluent afforded **3m** (127.3 mg, yield 54%) as yellow solid ( $R_f$  = 0.28); mp 191–193 °C;  $^1H$  NMR (600 MHz, DMSO- $d_6$ )  $\delta$  8.43 (s, 1H), 8.37 (d,  $J$  = 8.4 Hz, 1H), 8.31 (s, 1H), 8.27 (d,  $J$  = 8.4 Hz, 1H), 8.19 (s, 1H), 8.08 (d,  $J$  = 7.2 Hz, 1H), 7.95 (d,  $J$  = 8.4 Hz, 1H), 7.87 (d,  $J$  = 7.8 Hz, 1H), 7.72 (t,  $J$  = 7.8 Hz, 2H), 7.65 (t,  $J$  = 7.2 Hz, 1H), 7.51 (d,  $J$  = 7.2 Hz, 1H), 7.39 (t,  $J$  = 7.2 Hz, 1H), 3.59–3.54 (m, 1H), 3.31–3.26 (m, 1H), 3.22–3.17 (m, 1H), 3.12–3.06 (m, 1H);  $^{13}C$  NMR (150 MHz, DMSO- $d_6$ )  $\delta$  193.4, 186.9, 172.1, 148.2, 147.4, 140.7, 138.3, 138.2, 135.5, 134.3, 131.9, 131.4, 130.7, 129.6, 128.6, 126.7, 126.3, 123.9, 123.8, 120.8, 102.6, 90.1, 37.4, 27.6; HRMS (ESI)  $m/z$ :  $[M+H]^+$  Calcd for  $C_{25}H_{18}N_3O_7^+$  472.11393; Found 472.11404.

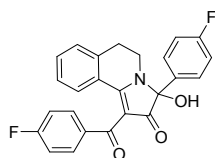

**3n**

**1-(4-fluorobenzoyl)-3-(4-fluorophenyl)-3-hydroxy-5,6-dihydropyrrolo[2,1-*a*]isoquinolin-2(3*H*)-one (**3n**)**

Prepared according to the **1n** (1.0 equiv, 0.5 mmol, 69.0 mg), I<sub>2</sub> (1.0 equiv, 0.5 mmol, 127.0 mg) at room temperature, and DMSO (2 mL) was added. The resulting mixture was stirred at 130 °C (heating block) for 1 h. Then **2a** (1.0 equiv, 0.5 mmol, 67.5 mg) was added at 130 °C (heating block) to react for 4 h. Purification by column chromatography on silica gel using petroleum ether/ethyl acetate (2:1 v/v) as eluent afforded **3n** (129.4 mg, yield 62%) as yellow solid (R<sub>f</sub> = 0.3); mp 219–220 °C; <sup>1</sup>H NMR (600 MHz, DMSO-*d*<sub>6</sub>) δ 7.81–7.76 (m, 2H), 7.74 (s, 1H), 7.73 (s, 1H), 7.60 (t, *J* = 7.2 Hz, 1H), 7.52–7.45 (m, 3H), 7.34 (t, *J* = 7.2 Hz, 1H), 7.28–7.21 (m, 4H), 3.53–3.47 (m, 1H), 3.21–3.16 (m, 1H), 3.16–3.11 (m, 1H), 3.09–3.03 (m, 1H); <sup>13</sup>C NMR (150 MHz, DMSO-*d*<sub>6</sub>) δ 194.0, 188.2, 170.8, 165.3, 163.7, 163.0, 161.4, 138.0, 135.8, 133.7, 132.4, 132.1, 131.0, 128.6, 127.8, 126.7, 124.0, 115.7, 115.5, 114.9, 114.8, 102.8, 90.3, 37.1, 27.7; HRMS (ESI) *m/z*: [M+H]<sup>+</sup> Calcd for C<sub>25</sub>H<sub>18</sub>F<sub>2</sub>NO<sub>3</sub><sup>+</sup> 418.12493; Found 418.12491.

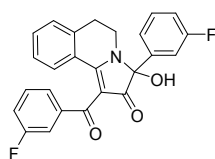

**3o**

**1-(3-fluorobenzoyl)-3-(3-fluorophenyl)-3-hydroxy-5,6-dihydropyrrolo[2,1-*a*]isoquinolin-2(3*H*)-one (**3o**)**

Prepared according to the **1o** (1.0 equiv, 0.5 mmol, 69.0 mg), I<sub>2</sub> (1.0 equiv, 0.5 mmol, 127.0 mg) at room temperature, and DMSO (2 mL) was added. The resulting mixture was stirred at 130 °C (heating block) for 1 h. Then **2a** (1.0 equiv, 0.5 mmol, 67.5 mg) was added at 130 °C (heating block) to react for 4 h. Purification by column chromatography on silica gel using petroleum ether/ethyl acetate (2:1 v/v) as eluent afforded **3o** (123.1 mg, yield 59%) as yellow solid (R<sub>f</sub> = 0.3); mp 192–194 °C; <sup>1</sup>H NMR (600 MHz, DMSO-*d*<sub>6</sub>) δ 7.89 (s, 1H), 7.83 (d, *J* = 7.2 Hz, 1H), 7.64–7.55 (m, 2H), 7.54–7.42 (m, 4H), 7.42–7.31 (m, 3H), 7.28 (d, *J* = 7.2 Hz, 1H), 7.25–7.19 (m, 1H), 3.60–3.49 (m, 1H), 3.28–3.20 (m, 1H), 3.20–3.12 (m, 1H), 3.12–3.03 (m, 1H); <sup>13</sup>C NMR (150 MHz, DMSO-*d*<sub>6</sub>) δ 193.7, 188.3, 171.2, 163.3, 162.6, 161.6, 161.0, 141.7, 139.1, 138.1, 133.8, 131.1, 130.9, 130.0, 128.6, 126.7, 125.3, 124.0, 121.4, 118.8, 115.7, 115.6, 113.0, 112.8, 102.9, 90.2, 37.2, 27.7; HRMS (ESI) *m/z*: [M+H]<sup>+</sup> Calcd for C<sub>25</sub>H<sub>18</sub>F<sub>2</sub>NO<sub>3</sub><sup>+</sup> 418.12493; Found 418.12460.

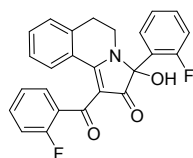

**3p**

1-(2-fluorobenzoyl)-3-(2-fluorophenyl)-3-hydroxy-5,6-dihydropyrrolo[2,1-*a*]isoquinolin-2(3*H*)-one (**3p**)

Prepared according to the **1p** (1.0 equiv, 0.5 mmol, 69.0 mg), **I<sub>2</sub>** (1.0 equiv, 0.5 mmol, 127.0 mg) at room temperature, and DMSO (2 mL) was added. The resulting mixture was stirred at 130 °C (heating block) for 1 h. Then **2a** (1.0 equiv, 0.5 mmol, 67.5 mg) was added at 130 °C (heating block) to react for 4 h. Purification by column chromatography on silica gel using petroleum ether/ethyl acetate (2:1 v/v) as eluent afforded **3p** (114.8 mg, yield 55%) as yellow solid (*R<sub>f</sub>* = 0.3); mp 236–238 °C; <sup>1</sup>H NMR (600 MHz, DMSO-*d*<sub>6</sub>) δ 8.09 (d, *J* = 7.8 Hz, 1H), 7.95 (s, 1H), 7.85 (t, *J* = 7.2 Hz, 1H), 7.61 (t, *J* = 7.2 Hz, 1H), 7.52–7.41 (m, 4H), 7.38 (t, *J* = 7.8 Hz, 1H), 7.31 (t, *J* = 7.2 Hz, 1H), 7.24–7.12 (m, 3H), 3.53–3.50 (m, 1H), 3.09–3.02 (m, 1H), 3.01–2.95 (m, 1H), 2.95–2.88 (m, 1H); <sup>13</sup>C NMR (150 MHz, DMSO-*d*<sub>6</sub>) δ 193.7, 184.3, 170.4, 160.8, 159.8, 159.2, 158.1, 138.0, 134.0, 132.3, 132.2, 131.4, 131.3, 130.1, 130.0, 129.9, 129.8, 128.4, 126.6, 124.6, 124.3, 123.9, 123.4, 123.3, 115.8, 115.7, 115.6, 115.5, 104.8, 87.4, 37.3, 27.8; HRMS (ESI) *m/z*: [M+H]<sup>+</sup> Calcd for C<sub>25</sub>H<sub>18</sub>F<sub>2</sub>NO<sub>3</sub><sup>+</sup> 418.12493; Found 418.12454.

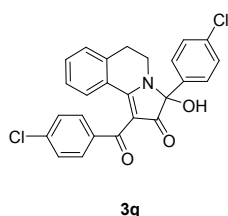

1-(4-chlorobenzoyl)-3-(4-chlorophenyl)-3-hydroxy-5,6-dihydropyrrolo[2,1-*a*]isoquinolin-2(3*H*)-one (**3q**)

Prepared according to the **1q** (1.0 equiv, 0.5 mmol, 77.0 mg), **I<sub>2</sub>** (1.0 equiv, 0.5 mmol, 127.0 mg) at room temperature, and DMSO (2 mL) was added. The resulting mixture was stirred at 130 °C (heating block) for 1 h. Then **2a** (1.0 equiv, 0.5 mmol, 67.5 mg) was added at 130 °C (heating block) to react for 4 h. Purification by column chromatography on silica gel using petroleum ether/ethyl acetate (2:1 v/v) as eluent afforded **3q** (153.1 mg, yield 68%) as yellow solid (*R<sub>f</sub>* = 0.3); mp 200–202 °C; <sup>1</sup>H NMR (600 MHz, DMSO-*d*<sub>6</sub>) δ 7.80 (s, 1H), 7.77 (d, *J* = 7.8 Hz, 1H), 7.70 (d, *J* = 8.4 Hz, 2H), 7.61 (t, *J* = 7.2 Hz, 1H), 7.49 (d, *J* = 7.8 Hz, 3H), 7.47 (s, 4H), 7.35 (t, *J* = 7.8 Hz, 1H), 3.53–3.47 (m, 1H), 3.22–3.17 (m, 1H), 3.17–3.12 (m, 1H), 3.08–3.03 (m, 1H); <sup>13</sup>C NMR (150 MHz, DMSO-*d*<sub>6</sub>) δ 193.8, 188.3, 171.0, 138.04, 137.96, 136.8, 135.1, 133.8, 133.4, 131.2, 131.1, 128.8, 128.6, 128.0, 127.6, 126.7, 123.9, 102.8, 90.3, 37.1, 27.6; HRMS (ESI) *m/z*: [M+H]<sup>+</sup> Calcd for C<sub>25</sub>H<sub>18</sub>Cl<sub>2</sub>NO<sub>3</sub><sup>+</sup> 450.06583; Found 450.06598.

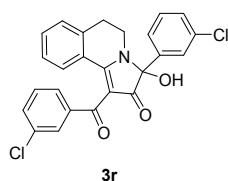

1-(3-chlorobenzoyl)-3-(3-chlorophenyl)-3-hydroxy-5,6-dihydropyrrolo[2,1-*a*]isoquinolin-2(3*H*)-one (**3r**)

Prepared according to the **1r** (1.0 equiv, 0.5 mmol, 77.0 mg), **I<sub>2</sub>** (1.0 equiv, 0.5 mmol, 127.0 mg) at room temperature, and DMSO (2 mL) was added. The resulting mixture was stirred at 130 °C

(heating block) for 1 h. Then **2a** (1.0 equiv, 0.5 mmol, 67.5 mg) was added at 130 °C (heating block) to react for 4 h. Purification by column chromatography on silica gel using petroleum ether/ethyl acetate (2:1 v/v) as eluent afforded **3r** (146.3 mg, yield 65%) as yellow solid (R<sub>f</sub> = 0.3); mp 192–194 °C; <sup>1</sup>H NMR (600 MHz, DMSO-*d*<sub>6</sub>) δ 7.92 (s, 1H), 7.85 (d, *J* = 7.8 Hz, 1H), 7.72 (s, 1H), 7.66 (d, *J* = 7.8 Hz, 1H), 7.62–7.58 (m, 2H), 7.56 (s, 1H), 7.49–7.42 (m, 4H), 7.39–7.33 (m, 2H), 3.57–3.50 (m, 1H), 3.26–3.20 (m, 1H), 3.18–3.12 (m, 1H), 3.11–3.04 (m, 1H); <sup>13</sup>C NMR (100 MHz, DMSO-*d*<sub>6</sub>) δ 193.7, 188.1, 171.3, 141.3, 138.6, 138.1, 133.9, 133.6, 132.7, 131.7, 131.1, 130.8, 129.8, 129.0, 128.8, 128.6, 127.8, 126.7, 125.8, 124.0, 123.9, 102.8, 90.2, 37.3, 27.7; HRMS (ESI) *m/z*: [M+H]<sup>+</sup> Calcd for C<sub>25</sub>H<sub>18</sub>Cl<sub>2</sub>NO<sub>3</sub><sup>+</sup> 450.06583; Found 450.06598.

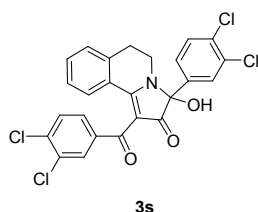

**1-(3,4-dichlorobenzoyl)-3-(3,4-dichlorophenyl)-3-hydroxy-5,6-dihydropyrrolo[2,1-*a*]isoquinolin-2(3*H*)-one (**3s**)**

Prepared according to the **1s** (1.0 equiv, 0.5 mmol, 95.0 mg), I<sub>2</sub> (1.0 equiv, 0.5 mmol, 127.0 mg) at room temperature, and DMSO (2 mL) was added. The resulting mixture was stirred at 130 °C (heating block) for 1 h. Then **2a** (1.0 equiv, 0.5 mmol, 67.5 mg) was added at 130 °C (heating block) to react for 4 h. Purification by column chromatography on silica gel using petroleum ether/ethyl acetate (2:1 v/v) as eluent afforded **3s** (161.0 mg, yield 62%) as yellow solid (R<sub>f</sub> = 0.3); mp 138–140 °C; <sup>1</sup>H NMR (600 MHz, DMSO-*d*<sub>6</sub>) δ 8.02 (s, 1H), 7.89 (d, *J* = 7.2 Hz, 2H), 7.75–7.68 (m, 2H), 7.69–7.60 (m, 3H), 7.49 (d, *J* = 7.2 Hz, 1H), 7.41 (d, *J* = 8.4 Hz, 1H), 7.37 (t, *J* = 7.2 Hz, 1H), 3.58–3.49 (m, 1H), 3.31–3.24 (m, 1H), 3.22–3.14 (m, 1H), 3.11–3.03 (m, 1H); <sup>13</sup>C NMR (150 MHz, DMSO-*d*<sub>6</sub>) δ 193.4, 186.9, 171.6, 139.6, 138.2, 137.1, 134.5, 134.1, 131.64, 131.62, 131.3, 131.10, 131.06, 130.7, 130.2, 129.2, 128.6, 128.0, 126.6, 125.8, 123.8, 102.6, 89.8, 37.3, 27.6; HRMS (ESI) *m/z*: [M+H]<sup>+</sup> Calcd for C<sub>25</sub>H<sub>16</sub>Cl<sub>4</sub>NO<sub>3</sub><sup>+</sup> 517.98788; Found 517.98798.

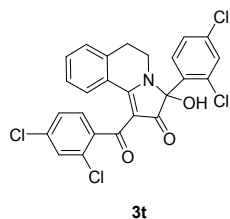

**1-(2,4-dichlorobenzoyl)-3-(2,4-dichlorophenyl)-3-hydroxy-5,6-dihydropyrrolo[2,1-*a*]isoquinolin-2(3*H*)-one (**3t**)**

Prepared according to the **1t** (1.0 equiv, 0.5 mmol, 95.0 mg), I<sub>2</sub> (1.0 equiv, 0.5 mmol, 127.0 mg) at room temperature, and DMSO (2 mL) was added. The resulting mixture was stirred at 130 °C (heating block) for 1 h. Then **2a** (1.0 equiv, 0.5 mmol, 67.5 mg) was added at 130 °C (heating block) to react for 4 h. Purification by column chromatography on silica gel using petroleum ether/ethyl acetate (2:1 v/v) as eluent afforded **3t** (168.7 mg, yield 65%) as yellow solid (R<sub>f</sub> = 0.3); mp 253–254 °C; <sup>1</sup>H NMR (600 MHz, DMSO-*d*<sub>6</sub>) δ 8.30 (d, *J* = 8.4 Hz, 1H), 8.17 (s, 1H), 8.01 (d, *J* = 9.0

Hz, 1H), 7.65 (t,  $J = 7.2$  Hz, 1H), 7.63–7.58 (m, 3H), 7.58–7.53 (m, 1H), 7.49–7.40 (m, 3H), 7.35 (d,  $J = 8.4$  Hz, 1H), 3.51–3.45 (m, 1H), 3.13–3.06 (m, 1H), 3.04–2.97 (m, 1H), 2.96–2.89 (m, 1H);  $^{13}\text{C}$  NMR (150 MHz, DMSO- $d_6$ )  $\delta$  193.2, 185.1, 171.8, 140.6, 138.0, 134.8, 134.4, 133.7, 132.3, 131.62, 131.60, 131.2, 129.9, 129.8, 128.6, 128.2, 127.4, 126.9, 126.6, 124.3, 105.0, 87.8, 37.4, 27.7; HRMS (ESI)  $m/z$ :  $[\text{M}+\text{H}]^+$  Calcd for  $\text{C}_{25}\text{H}_{16}\text{Cl}_4\text{NO}_3^+$  517.98788; Found 517.98724.

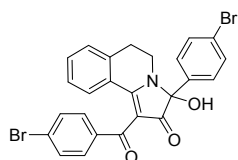

**3u**

1-(4-bromobenzoyl)-3-(4-bromophenyl)-3-hydroxy-5,6-dihydropyrrolo[2,1-*a*]isoquinolin-2(3*H*)-one (**3u**)

Prepared according to the **1u** (1.0 equiv, 0.5 mmol, 99.5 mg),  $\text{I}_2$  (1.0 equiv, 0.5 mmol, 127.0 mg) at room temperature, and DMSO (2 mL) was added. The resulting mixture was stirred at 130 °C (heating block) for 1 h. Then **2a** (1.0 equiv, 0.5 mmol, 67.5 mg) was added at 130 °C (heating block) to react for 4 h. Purification by column chromatography on silica gel using petroleum ether/ethyl acetate (2:1 v/v) as eluent afforded **3u** (175.2 mg, yield 65%) as yellow solid ( $R_f = 0.3$ ); mp 210–212 °C;  $^1\text{H}$  NMR (600 MHz, DMSO- $d_6$ )  $\delta$  7.80 (s, 1H), 7.77 (d,  $J = 7.8$  Hz, 1H), 7.64–7.61 (m, 4H), 7.61–7.59 (m, 2H), 7.48 (d,  $J = 7.8$  Hz, 1H), 7.40 (d,  $J = 8.4$  Hz, 2H), 7.35 (t,  $J = 7.2$  Hz, 1H), 3.52–3.47 (m, 1H), 3.21–3.17 (m, 1H), 3.15–3.11 (m, 1H), 3.08–3.03 (m, 1H);  $^{13}\text{C}$  NMR (150 MHz, DMSO- $d_6$ )  $\delta$  193.8, 188.4, 171.1, 138.3, 138.0, 135.5, 133.8, 131.7, 131.3, 131.1, 130.9, 128.6, 127.9, 126.7, 125.9, 123.9, 122.0, 102.7, 90.4, 37.1, 27.6; HRMS (ESI)  $m/z$ :  $[\text{M}+\text{H}]^+$  Calcd for  $\text{C}_{25}\text{H}_{18}\text{Br}_2\text{NO}_3^+$  537.96480; Found 537.96533.

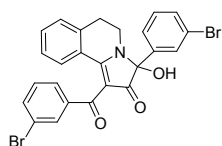

**3v**

1-(3-bromobenzoyl)-3-(3-bromophenyl)-3-hydroxy-5,6-dihydropyrrolo[2,1-*a*]isoquinolin-2(3*H*)-one (**3v**)

Prepared according to the **1v** (1.0 equiv, 0.5 mmol, 99.5 mg),  $\text{I}_2$  (1.0 equiv, 0.5 mmol, 127.0 mg) at room temperature, and DMSO (2 mL) was added. The resulting mixture was stirred at 130 °C (heating block) for 1 h. Then **2a** (1.0 equiv, 0.5 mmol, 67.5 mg) was added at 130 °C (heating block) to react for 4 h. Purification by column chromatography on silica gel using petroleum ether/ethyl acetate (2:1 v/v) as eluent afforded **3v** (167.2 mg, yield 62%) as yellow solid ( $R_f = 0.3$ ); mp 212–214 °C;  $^1\text{H}$  NMR (600 MHz, DMSO- $d_6$ )  $\delta$  7.92 (s, 1H), 7.85–7.80 (d,  $J = 8.4$  Hz, 2H), 7.72 (d,  $J = 8.4$  Hz, 1H), 7.69–7.66 (m, 2H), 7.64–7.58 (m, 2H), 7.48 (d,  $J = 7.8$  Hz, 1H), 7.39 (t,  $J = 7.2$  Hz, 3H), 7.35 (t,  $J = 7.8$  Hz, 1H), 3.55–3.49 (m, 1H), 3.26–3.20 (m, 1H), 3.18–3.13 (m, 1H), 3.10–3.04 (m, 1H);  $^{13}\text{C}$  NMR (150 MHz, DMSO- $d_6$ )  $\delta$  193.7, 188.0, 171.3, 141.5, 138.7, 138.1, 134.6, 133.9, 131.8, 131.7, 131.14, 131.05, 130.1, 128.7, 128.6, 128.2, 126.7, 124.3, 123.9, 122.1, 121.2, 102.7, 90.1, 37.3, 27.7; HRMS (ESI)  $m/z$ :  $[\text{M}+\text{H}]^+$  Calcd for  $\text{C}_{25}\text{H}_{18}\text{Br}_2\text{NO}_3^+$  537.96480; Found 537.96497.

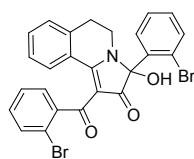

**3w**

1-(2-bromobenzoyl)-3-(2-bromophenyl)-3-hydroxy-5,6-dihydropyrrolo[2,1-*a*]isoquinolin-2(3*H*)-one (**3w**)

Prepared according to the **1w** (1.0 equiv, 0.5 mmol, 95.0 mg),  $I_2$  (1.0 equiv, 0.5 mmol, 127.0 mg) at room temperature, and DMSO (2 mL) was added. The resulting mixture was stirred at 130 °C (heating block) for 1 h. Then **2a** (1.0 equiv, 0.5 mmol, 67.5 mg) was added at 130 °C (heating block) to react for 4 h. Purification by column chromatography on silica gel using petroleum ether/ethyl acetate (2:1 v/v) as eluent afforded **3w** (153.7 mg, yield 57%) as yellow solid ( $R_f$  = 0.3); mp 226–228 °C;  $^1H$  NMR (600 MHz, DMSO- $d_6$ )  $\delta$  8.30 (d,  $J$  = 7.8 Hz, 1H), 8.01 (t,  $J$  = 7.8 Hz, 2H), 7.63 (t,  $J$  = 7.2 Hz, 1H), 7.58 (t,  $J$  = 8.4 Hz, 2H), 7.49 (t,  $J$  = 7.2 Hz, 1H), 7.44 (d,  $J$  = 6.0 Hz, 2H), 7.39–7.30 (m, 3H), 7.29–7.24 (m, 1H), 3.49–3.42 (m, 1H), 3.14–3.06 (m, 1H), 3.04–2.98 (m, 1H), 2.93–2.86 (m, 1H);  $^{13}C$  NMR (150 MHz, DMSO- $d_6$ )  $\delta$  193.2, 187.0, 172.2, 143.6, 137.8, 134.7, 134.1, 133.8, 132.2, 131.6, 131.0, 130.0, 128.6, 128.1, 127.6, 127.0, 126.5, 124.6, 119.8, 118.9, 105.3, 88.6, 37.5, 27.8; HRMS (ESI)  $m/z$ :  $[M+H]^+$  Calcd for  $C_{25}H_{18}Br_2NO_3^+$  537.96480; Found 537.96454.

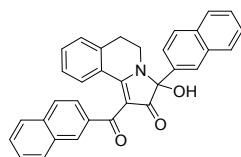

**3x**

1-(2-naphthoyl)-3-hydroxy-3-(naphthalen-2-yl)-5,6-dihydropyrrolo[2,1-*a*]isoquinolin-2(3*H*)-one (**3x**)

Prepared according to the **1x** (1.0 equiv, 0.5 mmol, 85.0 mg),  $I_2$  (1.0 equiv, 0.5 mmol, 127.0 mg) at room temperature, and DMSO (2 mL) was added. The resulting mixture was stirred at 130 °C (heating block) for 1 h. Then **2a** (1.0 equiv, 0.5 mmol, 67.5 mg) was added at 130 °C (heating block) to react for 4 h. Purification by column chromatography on silica gel using petroleum ether/ethyl acetate (2:1 v/v) as eluent afforded **3x** (139.6 mg, yield 58%) as yellow solid ( $R_f$  = 0.3); mp 224–226 °C;  $^1H$  NMR (600 MHz, DMSO- $d_6$ )  $\delta$  8.39 (s, 1H), 8.17 (s, 1H), 8.07–8.04 (m, 1H), 7.98 (d,  $J$  = 8.4 Hz, 1H), 7.96–7.92 (m, 3H), 7.92 (s, 1H), 7.89–7.83 (m, 3H), 7.64–7.56 (m, 3H), 7.55 (d,  $J$  = 7.8 Hz, 3H), 7.48 (d,  $J$  = 7.8 Hz, 1H), 7.34 (t,  $J$  = 7.2 Hz, 1H), 3.61–3.55 (m, 1H), 3.28–3.23 (m, 1H), 3.22–3.17 (m, 1H), 3.13–3.07 (m, 1H);  $^{13}C$  NMR (150 MHz, DMSO- $d_6$ )  $\delta$  194.4, 190.0, 170.6, 138.1, 136.7, 134.8, 133.8, 133.6, 132.9, 132.8, 132.0, 130.9, 130.7, 129.2, 128.7, 128.5, 128.3, 128.0, 127.6, 127.4, 126.7, 126.6, 126.50, 126.46, 125.6, 125.2, 124.2, 123.0, 103.6, 90.8, 37.3, 27.8; HRMS (ESI)  $m/z$ :  $[M+H]^+$  Calcd for  $C_{33}H_{24}NO_3^+$  482.17507; Found 482.17542.

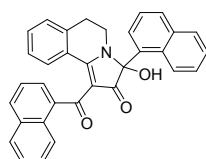

**3y**



1-(1-naphthoyl)-3-hydroxy-3-(naphthalen-1-yl)-5,6-dihydropyrrolo[2,1-*a*]isoquinolin-2(3*H*)-one (**3y**)

Prepared according to the **1y** (1.0 equiv, 0.5 mmol, 85 mg), **I<sub>2</sub>** (1.0 equiv, 0.5 mmol, 127.0 mg) at room temperature, and DMSO (2 mL) was added. The resulting mixture was stirred at 130 °C (heating block) for 1 h. Then **2a** (1.0 equiv, 0.5 mmol, 67.5 mg) was added at 130 °C (heating block) to react for 4 h. Purification by column chromatography on silica gel using petroleum ether/ethyl acetate (2:1 v/v) as eluent afforded **3y** (132.4 mg, yield 55%) as yellow solid (*R<sub>f</sub>* = 0.3); mp 230–232 °C; <sup>1</sup>H NMR (600 MHz, DMSO-*d*<sub>6</sub>) δ 8.37 (s, 1H), 8.26 (s, 1H), 8.04–7.83 (m, 6H), 7.77 (s, 1H), 7.62–7.52 (m, 3H), 7.51–7.44 (m, 7.2 Hz, 4H), 7.43–7.28 (m, 3H), 3.52 (s, 1H), 3.05 (s, 1H), 2.86 (s, 2H); <sup>13</sup>C NMR (150 MHz, DMSO-*d*<sub>6</sub>) δ 190.3, 170.8, 138.8, 138.0, 134.0, 133.2, 131.3, 131.2, 130.3, 130.0, 128.4, 128.2, 127.1, 126.7, 126.6, 125.83, 125.75, 124.8, 124.5, 103.4, 86.0, 37.4, 27.8; HRMS (ESI) *m/z*: [M+H]<sup>+</sup> Calcd for C<sub>33</sub>H<sub>24</sub>NO<sub>3</sub><sup>+</sup> 482.17507; Found 482.17545.

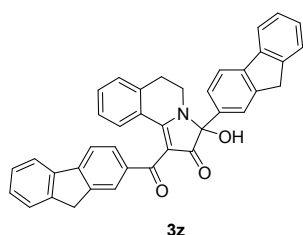

3-(9*H*-fluoren-2-yl)-1-(9*H*-fluorene-2-carbonyl)-3-hydroxy-5,6-dihydropyrrolo[2,1-*a*]isoquinolin-2(3*H*)-one (**3z**)

Prepared according to the **1z** (1.0 equiv, 0.5 mmol, 104.0 mg), **I<sub>2</sub>** (1.0 equiv, 0.5 mmol, 127.0 mg) at room temperature, and DMSO (2 mL) was added. The resulting mixture was stirred at 130 °C (heating block) for 1 h. Then **2a** (1.0 equiv, 0.5 mmol, 67.5 mg) was added at 130 °C (heating block) to react for 4 h. Purification by column chromatography on silica gel using petroleum ether/ethyl acetate (2:1 v/v) as eluent afforded **3z** (161.3 mg, yield 58%) as yellow solid (*R<sub>f</sub>* = 0.3); mp 235–237 °C; <sup>1</sup>H NMR (400 MHz, DMSO-*d*<sub>6</sub>) δ 8.00 (s, 1H), 7.97–7.88 (m, 4H), 7.85–7.75 (m, 2H), 7.72 (d, *J* = 4.0 Hz, 2H), 7.63–7.55 (m, 3H), 7.49 (t, *J* = 7.6 Hz, 2H), 7.43–7.30 (m, 5H), 3.95 (d, *J* = 5.2 Hz, 4H), 3.60–3.49 (m, 1H), 3.30–3.04 (m, 3H); <sup>13</sup>C NMR (100 MHz, DMSO-*d*<sub>6</sub>) δ 194.5, 189.9, 170.2, 144.9, 144.3, 143.5, 143.4, 142.4, 141.5, 140.5, 140.3, 138.0, 137.8, 135.0, 133.5, 130.8, 129.1, 128.7, 127.7, 127.1, 127.0, 126.8, 126.7, 126.0, 125.3, 125.2, 124.2, 122.4, 120.9, 120.2, 120.1, 119.3, 103.6, 90.9, 37.2, 36.5, 36.4, 27.8; HRMS (ESI) *m/z*: [M+H]<sup>+</sup> Calcd for C<sub>39</sub>H<sub>28</sub>NO<sub>3</sub><sup>+</sup> 558.20637; Found 558.20667.

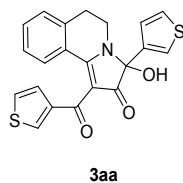

3-hydroxy-3-(thiophen-3-yl)-1-(thiophene-3-carbonyl)-5,6-dihydropyrrolo[2,1-*a*]isoquinolin-2(3*H*)-one (**3aa**)

Prepared according to the **1aa** (1.0 equiv, 0.5 mmol, 63.0 mg), **I<sub>2</sub>** (1.0 equiv, 0.5 mmol, 127.0 mg) at room temperature, and DMSO (2 mL) was added. The resulting mixture was stirred at 130 °C (heating block) for 1 h. Then **2a** (1.0 equiv, 0.5 mmol, 67.5 mg) was added at 130 °C (heating block)

to react for 4 h. Purification by column chromatography on silica gel using petroleum ether/ethyl acetate (2:1 v/v) as eluent afforded **3aa** (98.3 mg, yield 50%) as yellow solid ( $R_f = 0.3$ ); mp 266–268 °C;  $^1\text{H}$  NMR (400 MHz,  $\text{DMSO}-d_6$ )  $\delta$  8.09 (d,  $J = 2.0$  Hz, 1H), 7.64 (d,  $J = 7.6$  Hz, 2H), 7.59–7.52 (m, 3H), 7.52–7.48 (m, 1H), 7.45 (d,  $J = 7.6$  Hz, 1H), 7.38 (d,  $J = 5.2$  Hz, 1H), 7.30 (t,  $J = 7.6$  Hz, 1H), 7.06 (d,  $J = 5.2$  Hz, 1H), 3.54–3.46 (m, 1H), 3.24–3.10 (m, 2H), 3.10–2.98 (m, 1H);  $^{13}\text{C}$  NMR (100 MHz,  $\text{DMSO}-d_6$ )  $\delta$  193.6, 183.4, 168.9, 143.4, 138.1, 138.0, 133.9, 133.3, 130.7, 128.6, 127.8, 127.3, 126.6, 126.0, 125.3, 124.2, 123.9, 104.1, 89.4, 37.1, 27.7; HRMS (ESI)  $m/z$ :  $[\text{M}+\text{H}]^+$  Calcd for  $\text{C}_{21}\text{H}_{16}\text{NO}_3\text{S}_2^+$  394.05661; Found 394.05658.

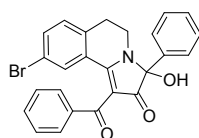

**4a**

1-benzoyl-9-bromo-3-hydroxy-3-phenyl-5,6-dihydropyrrolo[2,1-*a*]isoquinolin-2(3*H*)-one (**4a**)  
Prepared according to the **1a** (1.0 equiv, 0.5 mmol, 60.0 mg),  $\text{I}_2$  (1.0 equiv, 0.5 mmol, 127.0 mg) at room temperature, and DMSO (2 mL) was added. The resulting mixture was stirred at 130 °C (heating block) for 1 h. Then **2b** (1.0 equiv, 0.5 mmol, 106.0 mg) was added at 130 °C (heating block) to react for 4 h. Purification by column chromatography on silica gel using petroleum ether/ethyl acetate (2:1 v/v) as eluent afforded **4a** (154.2 mg, yield 67%) as yellow solid ( $R_f = 0.3$ ); mp 216–218 °C;  $^1\text{H}$  NMR (600 MHz,  $\text{DMSO}-d_6$ )  $\delta$  7.94 (s, 1H), 7.80 (d,  $J = 7.8$  Hz, 1H), 7.73 (s, 1H), 7.68 (d,  $J = 6.0$  Hz, 2H), 7.54–7.51 (m, 1H), 7.49–7.44 (m, 3H), 7.43–7.36 (m, 5H), 3.53–3.49 (m, 1H), 3.16–3.08 (m, 2H), 3.05–3.00 (m, 1H);  $^{13}\text{C}$  NMR (150 MHz,  $\text{DMSO}-d_6$ )  $\delta$  194.6, 189.8, 169.5, 139.3, 137.4, 136.0, 135.9, 133.1, 132.2, 130.8, 129.3, 128.8, 128.0, 126.2, 125.6, 119.2, 103.3, 90.8, 37.0, 27.4; HRMS (ESI)  $m/z$ :  $[\text{M}+\text{H}]^+$  Calcd for  $\text{C}_{25}\text{H}_{19}\text{BrNO}_3^+$  460.05428; Found 460.05466.

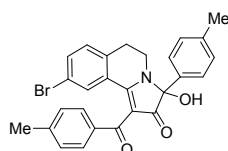

**4b**

9-bromo-3-hydroxy-1-(4-methylbenzoyl)-3-(*p*-tolyl)-5,6-dihydropyrrolo[2,1-*a*]isoquinolin-2(3*H*)-one (**4b**)

Prepared according to the **1b** (1.0 equiv, 0.5 mmol, 67.0 mg),  $\text{I}_2$  (1.0 equiv, 0.5 mmol, 127.0 mg) at room temperature, and DMSO (2 mL) was added. The resulting mixture was stirred at 130 °C (heating block) for 1 h. Then **2b** (1.0 equiv, 0.5 mmol, 106.0 mg) was added at 130 °C (heating block) to react for 4 h. Purification by column chromatography on silica gel using petroleum ether/ethyl acetate (2:1 v/v) as eluent afforded **4b** (149.0 mg, yield 61%) as yellow solid ( $R_f = 0.3$ ); mp 212–214 °C;  $^1\text{H}$  NMR (600 MHz,  $\text{DMSO}-d_6$ )  $\delta$  7.90 (s, 1H), 7.80 (d,  $J = 7.8$  Hz, 1H), 7.63 (s, 1H), 7.60 (d,  $J = 6.0$  Hz, 2H), 7.45 (d,  $J = 7.2$  Hz, 1H), 7.34 (d,  $J = 6.6$  Hz, 2H), 7.22 (d,  $J = 7.2$  Hz, 4H), 3.51–3.46 (m, 1H), 3.14–3.06 (m, 2H), 3.04–2.99 (m, 1H), 2.35 (s, 3H), 2.30 (s, 3H);  $^{13}\text{C}$  NMR (150 MHz,  $\text{CDCl}_3$ )  $\delta$  194.7, 189.5, 169.0, 142.5, 138.1, 137.3, 136.7, 133.0, 129.5, 128.6, 126.2,

125.5, 119.1, 103.5, 36.9, 27.4, 21.2, 20.8; HRMS (ESI)  $m/z$ :  $[M+H]^+$  Calcd for  $C_{27}H_{23}BrNO_3^+$  488.08558; Found 488.08551.

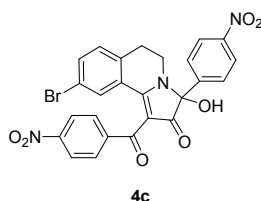

9-bromo-3-hydroxy-1-(4-nitrobenzoyl)-3-(4-nitrophenyl)-5,6-dihydropyrrolo [2,1-*a*]isoquinolin-2(3*H*)-one (**4c**)

Prepared according to the **11** (1.0 equiv, 0.5 mmol, 82.5 mg),  $I_2$  (1.0 equiv, 0.5 mmol, 127.0 mg) at room temperature, and DMSO (2 mL) was added. The resulting mixture was stirred at 130 °C (heating block) for 1 h. Then **2b** (1.0 equiv, 0.5 mmol, 106.0 mg) was added at 130 °C (heating block) to react for 4 h. Purification by column chromatography on silica gel using petroleum ether/ethyl acetate (1:1 v/v) as eluent afforded **4c** (132.1 mg, yield 48%) as yellow solid ( $R_f$  = 0.28); mp 226–228 °C;  $^1H$  NMR (600 MHz, DMSO- $d_6$ )  $\delta$  8.25 (s, 4H), 8.19 (s, 2H), 7.86 (d,  $J$  = 8.4 Hz, 1H), 7.82 (d,  $J$  = 7.2 Hz, 2H), 7.77 (d,  $J$  = 7.2 Hz, 2H), 7.49 (d,  $J$  = 7.2 Hz, 1H), 3.60–3.55 (m, 1H), 3.25–3.20 (m, 1H), 3.17–3.12 (m, 1H), 3.07–3.02 (m, 1H);  $^{13}C$  NMR (150 MHz, DMSO- $d_6$ )  $\delta$  193.6, 187.6, 170.7, 149.0, 147.9, 145.1, 142.5, 137.6, 136.7, 133.7, 130.7, 130.3, 127.3, 125.9, 124.1, 123.1, 119.2, 103.0, 90.5, 37.2, 27.3; HRMS (ESI)  $m/z$ :  $[M+H]^+$  Calcd for  $C_{25}H_{17}BrN_3O_7^+$  550.02444; Found 550.02472.

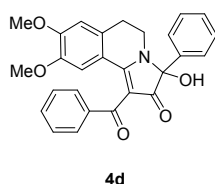

1-benzoyl-3-hydroxy-8,9-dimethoxy-3-phenyl-5,6-dihydropyrrolo[2,1-*a*]isoquinolin-2(3*H*)-one (**4d**)

Prepared according to the **1a** (1.0 equiv, 0.5 mmol, 60.0 mg),  $I_2$  (1.0 equiv, 0.5 mmol, 127.0 mg) at room temperature, and DMSO (2 mL) was added. The resulting mixture was stirred at 130 °C (heating block) for 1 h. Then **2c** (1.0 equiv, 0.5 mmol, 96.5 mg) was added at 130 °C (heating block) to react for 4 h. Purification by column chromatography on silica gel using petroleum ether/ethyl acetate (1:2 v/v) as eluent afforded **4d** (116.9 mg, yield 53%) as yellow solid ( $R_f$  = 0.34); mp 236–238 °C;  $^1H$  NMR (600 MHz, DMSO- $d_6$ )  $\delta$  7.69 (s, 2H), 7.58 (s, 1H), 7.44 (s, 5H), 7.36 (d,  $J$  = 15.0 Hz, 4H), 7.08 (s, 1H), 3.86 (s, 3H), 3.53 (s, 3H), 3.16–2.96 (m, 4H);  $^{13}C$  NMR (150 MHz,  $CDCl_3$ )  $\delta$  194.4, 189.8, 169.8, 153.2, 146.5, 139.8, 136.5, 132.9, 131.9, 129.3, 129.2, 128.7, 127.9, 125.6, 116.1, 114.1, 111.4, 102.6, 90.5, 55.9, 55.5, 37.4, 27.4; HRMS (ESI)  $m/z$ :  $[M+H]^+$  Calcd for  $C_{27}H_{24}NO_5^+$  442.16490; Found 442.16452.

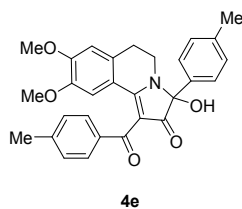

3-hydroxy-8,9-dimethoxy-1-(4-methylbenzoyl)-3-(*p*-tolyl)-5,6-dihydropyrrolo[2,1-*a*]isoquinolin-2(3*H*)-one (**4e**)

Prepared according to the **1b** (1.0 equiv, 0.5 mmol, 67.0 mg), I<sub>2</sub> (1.0 equiv, 0.5 mmol, 127.0 mg) at room temperature, and DMSO (2 mL) was added. The resulting mixture was stirred at 130 °C (heating block) for 1 h. Then **2c** (1.0 equiv, 0.5 mmol, 96.5 mg) was added at 130 °C (heating block) to react for 4 h. Purification by column chromatography on silica gel using petroleum ether/ethyl acetate (1:2 v/v) as eluent afforded **4e** (117.2 mg, yield 50%) as yellow solid (R<sub>f</sub> = 0.32); mp 221–223 °C; <sup>1</sup>H NMR (600 MHz, DMSO-*d*<sub>6</sub>) δ 7.61 (d, *J* = 7.2 Hz, 2H), 7.48 (s, 1H), 7.32 (d, *J* = 8.4 Hz, 3H), 7.22 (d, *J* = 6.0 Hz, 2H), 7.18 (d, *J* = 6.0 Hz, 2H), 7.07 (s, 1H), 3.86 (s, 3H), 3.52 (s, 3H), 3.44 (s, 1H), 3.13–3.07 (m, 1H), 3.04–2.96 (m, 2H), 2.31 (d, *J* = 14.4 Hz, 6H); <sup>13</sup>C NMR (150 MHz, CDCl<sub>3</sub>) δ 194.5, 189.7, 169.5, 153.1, 146.5, 142.1, 137.8, 137.2, 133.7, 132.8, 129.5, 129.4, 128.6, 125.6, 116.2, 113.9, 111.4, 102.7, 90.4, 55.9, 55.4, 37.3, 27.4, 21.2, 20.8; HRMS (ESI) *m/z*: [M+H]<sup>+</sup> Calcd for C<sub>29</sub>H<sub>28</sub>NO<sub>5</sub><sup>+</sup> 470.19620; Found 470.19601.

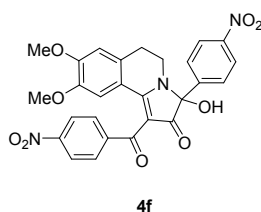

3-hydroxy-8,9-dimethoxy-1-(4-nitrobenzoyl)-3-(4-nitrophenyl)-5,6-dihydropyrrolo[2,1-*a*]isoquinolin-2(3*H*)-one (**4f**)

Prepared according to the **1l** (1.0 equiv, 0.5 mmol, 82.5 mg), I<sub>2</sub> (1.0 equiv, 0.5 mmol, 127.0 mg) at room temperature, and DMSO (2 mL) was added. The resulting mixture was stirred at 130 °C (heating block) for 1 h. Then **2c** (1.0 equiv, 0.5 mmol, 96.5 mg) was added at 130 °C (heating block) to react for 4 h. Purification by column chromatography on silica gel using petroleum ether/ethyl acetate (1:2 v/v) as eluent afforded **4f** (119.7 mg, yield 45%) as yellow solid (R<sub>f</sub> = 0.27); mp 220–222 °C; <sup>1</sup>H NMR (600 MHz, DMSO-*d*<sub>6</sub>) δ 8.26 (d, *J* = 8.4 Hz, 2H), 8.22 (d, *J* = 8.4 Hz, 2H), 8.01 (s, 1H), 7.82 (d, *J* = 8.4 Hz, 2H), 7.73 (d, *J* = 9.0 Hz, 3H), 7.13 (s, 1H), 3.90 (s, 3H), 3.65 (s, 3H), 3.54–3.50 (m, 1H), 3.24–3.18 (m, 1H), 3.13–3.08 (m, 1H), 3.05–3.00 (m, 1H); <sup>13</sup>C NMR (150 MHz, DMSO-*d*<sub>6</sub>) δ 193.4, 187.7, 170.9, 153.9, 148.8, 147.7, 146.6, 145.8, 143.3, 133.5, 130.1, 130.0, 127.3, 127.2, 123.0, 115.8, 114.6, 102.3, 90.1, 56.0, 55.7, 37.6, 27.3; HRMS (ESI) *m/z*: [M+H]<sup>+</sup> Calcd for C<sub>27</sub>H<sub>22</sub>N<sub>3</sub>O<sub>9</sub><sup>+</sup> 532.13506; Found 532.13544.

## 5. Copies of $^1\text{H}$ NMR, $^{13}\text{C}$ NMR spectra

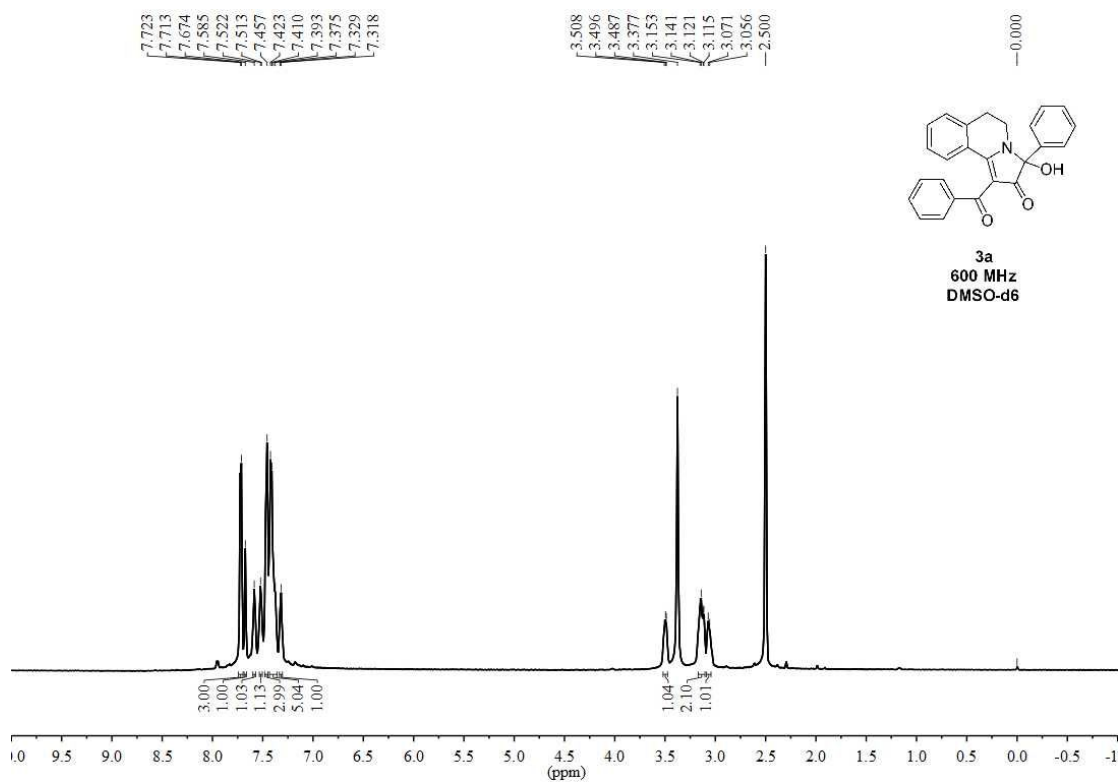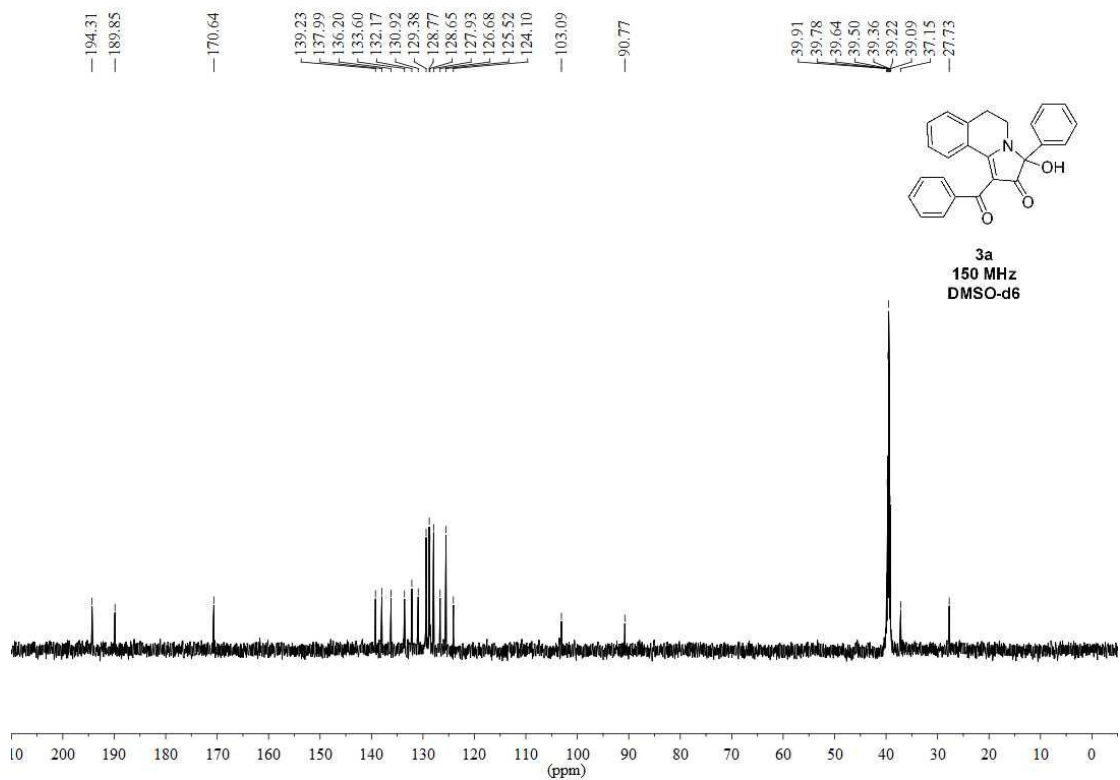

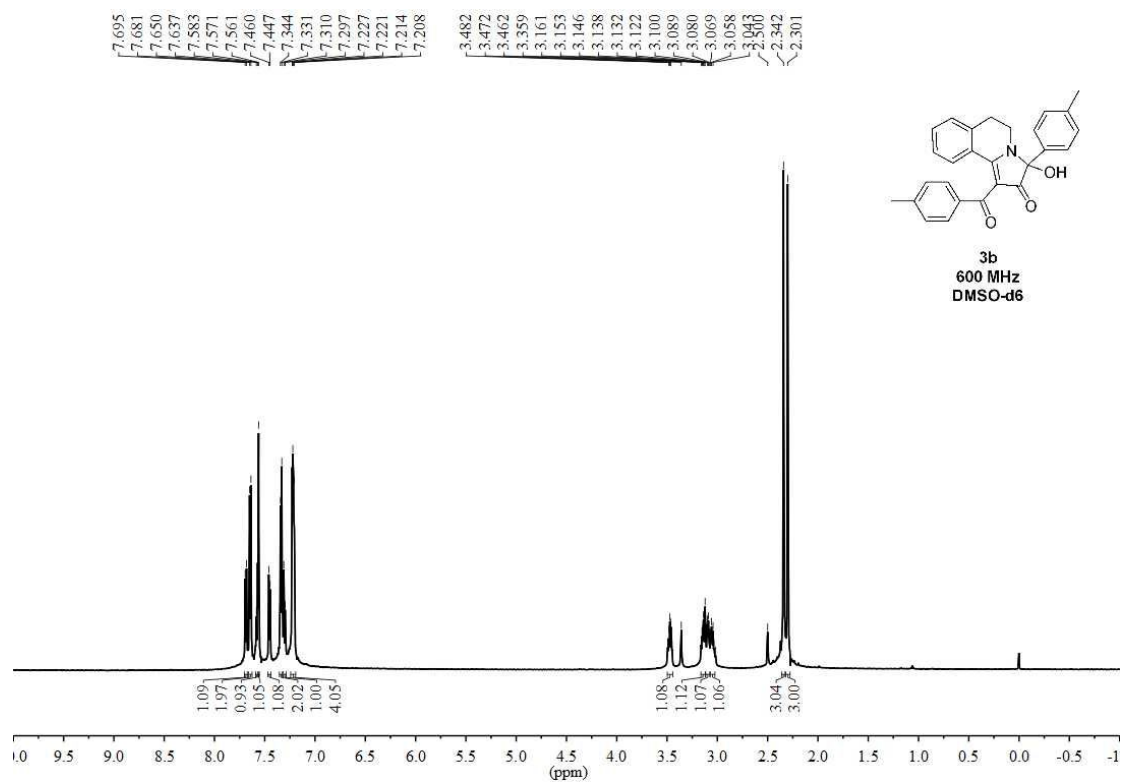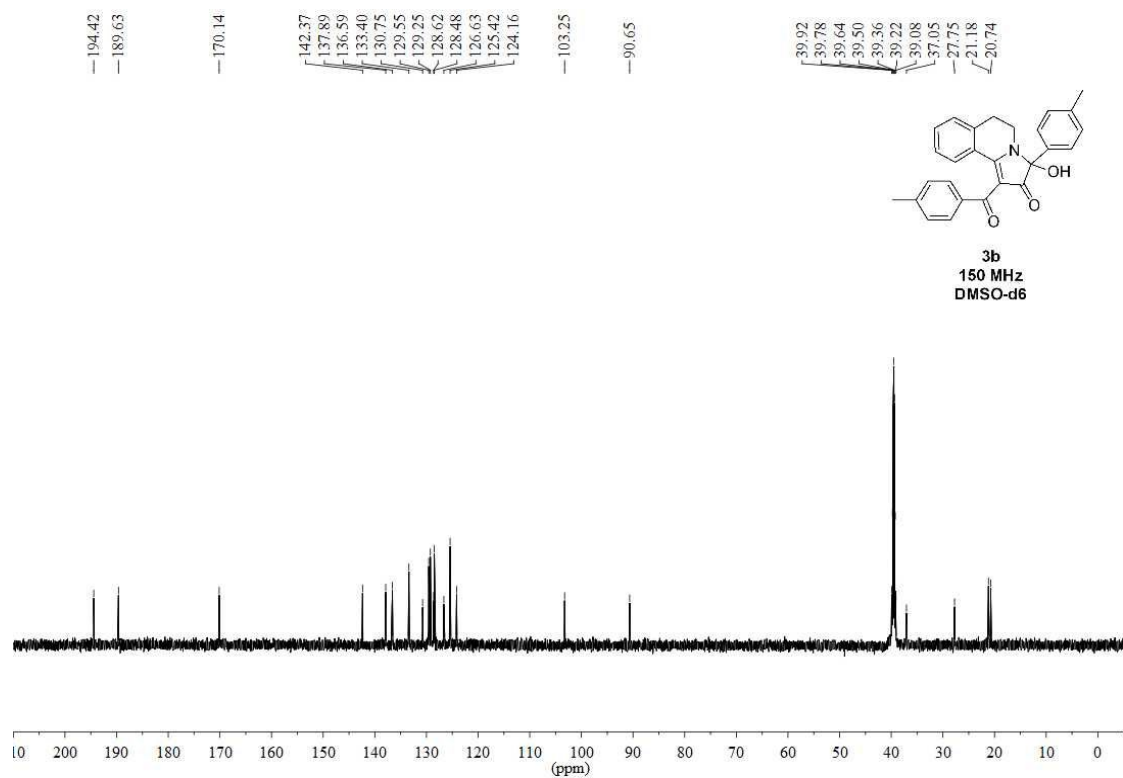

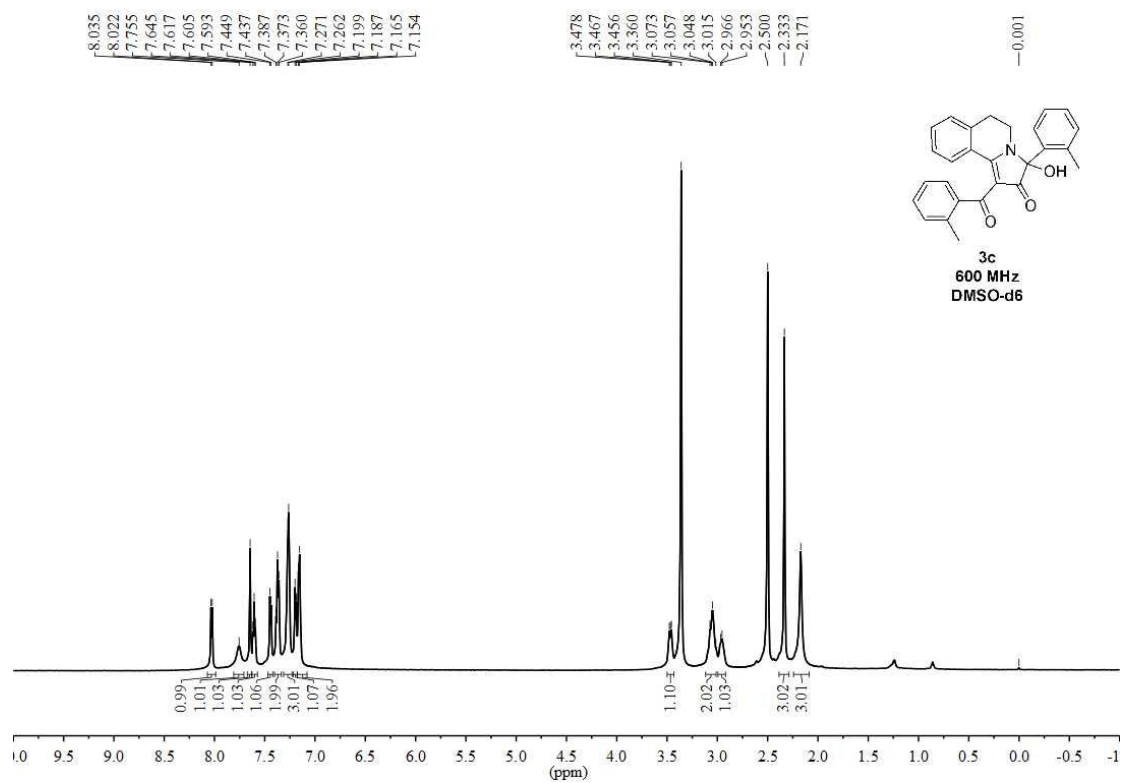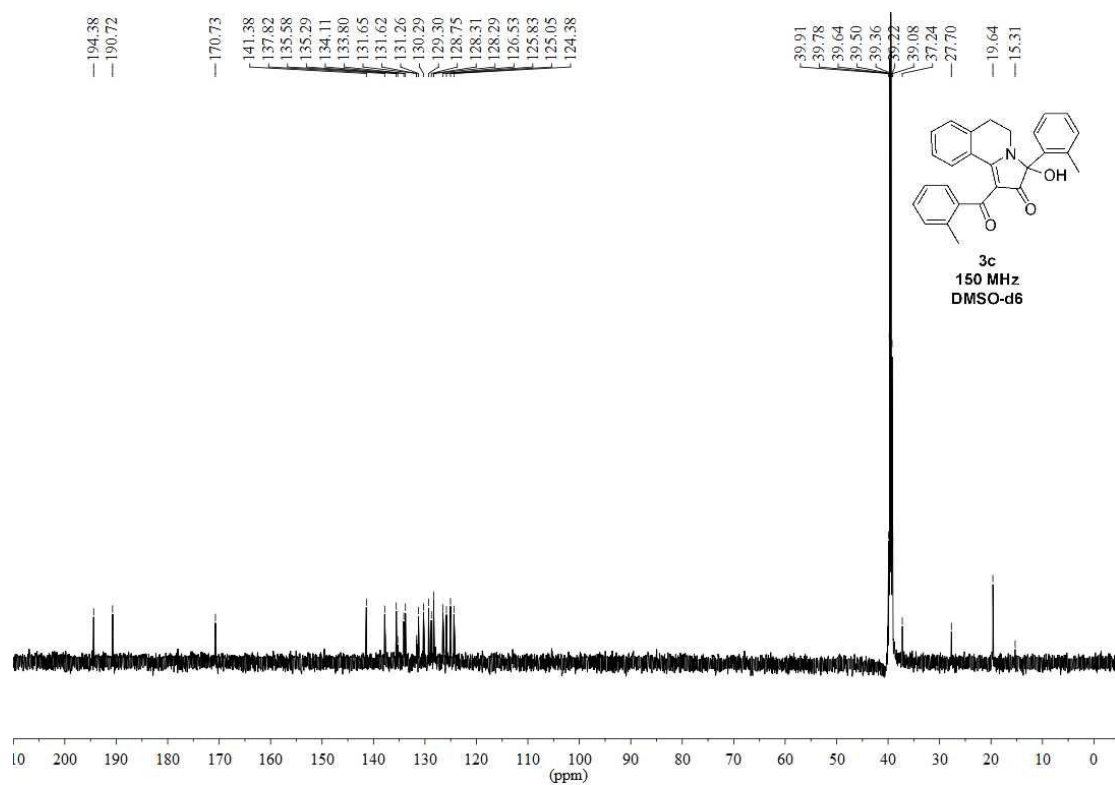

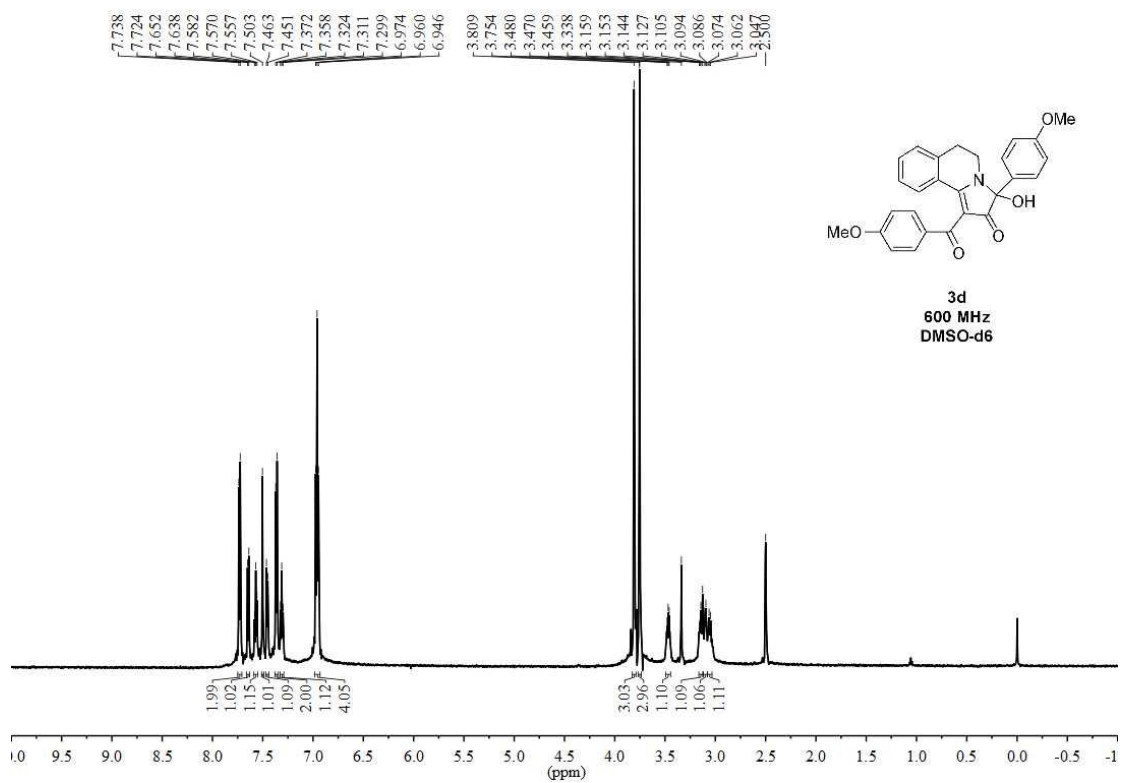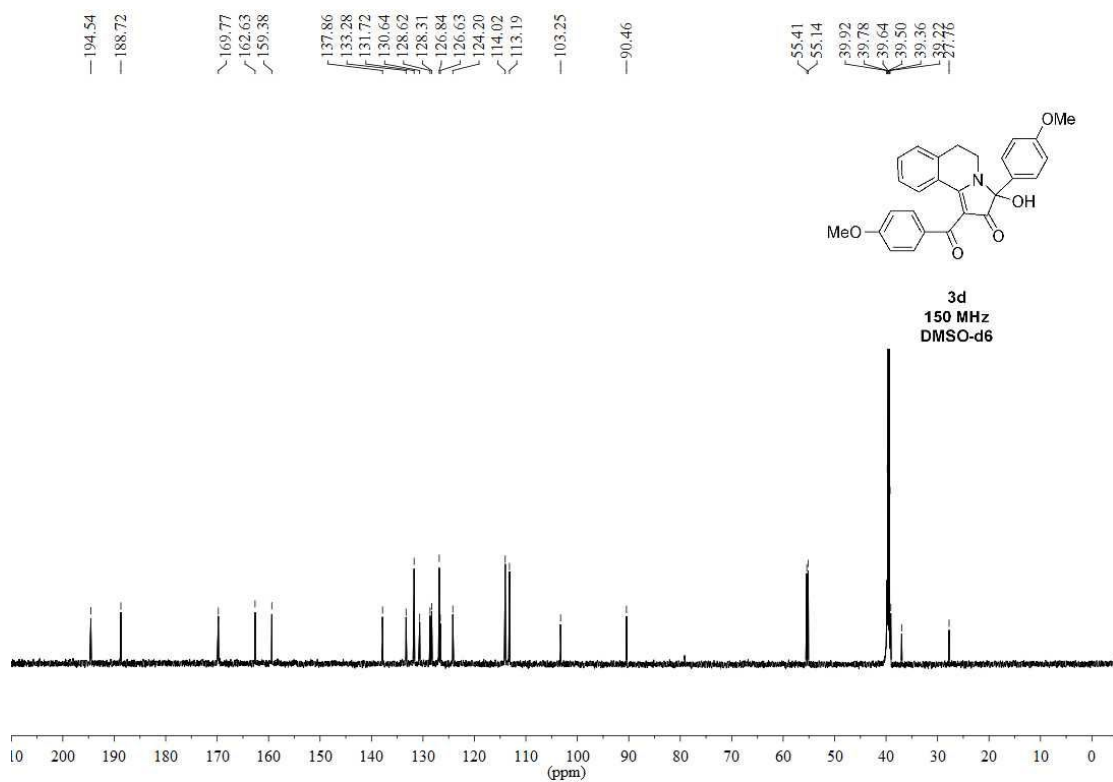



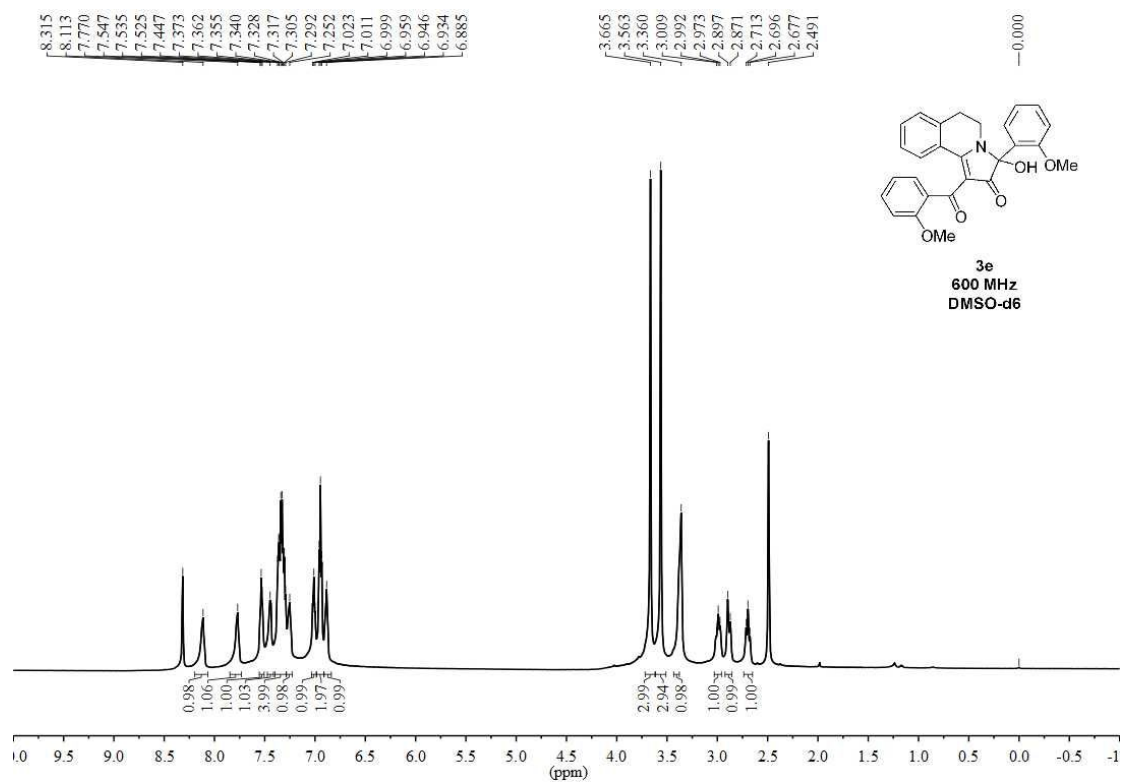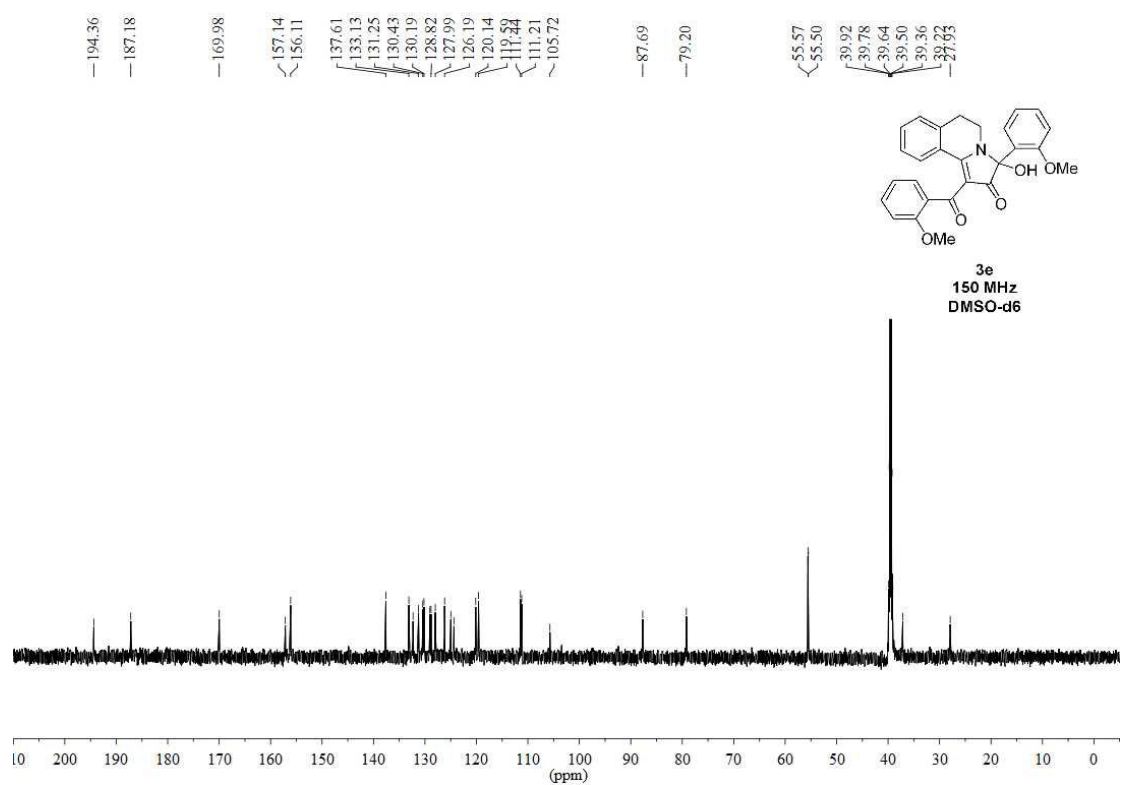

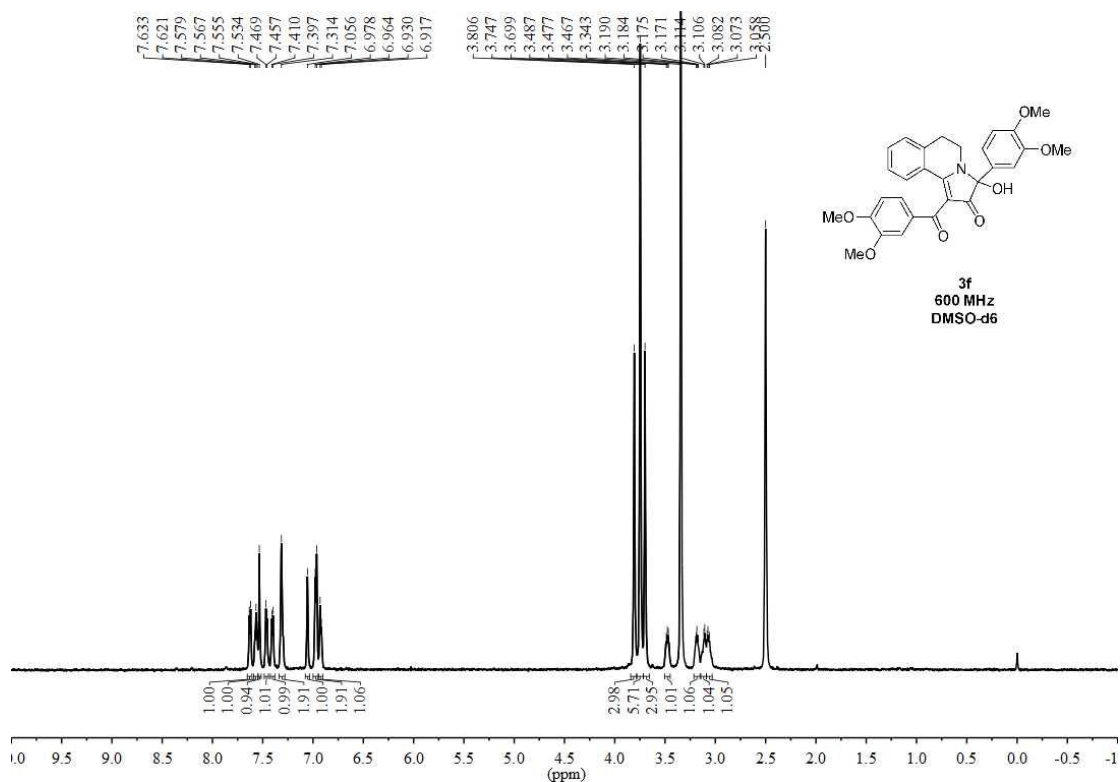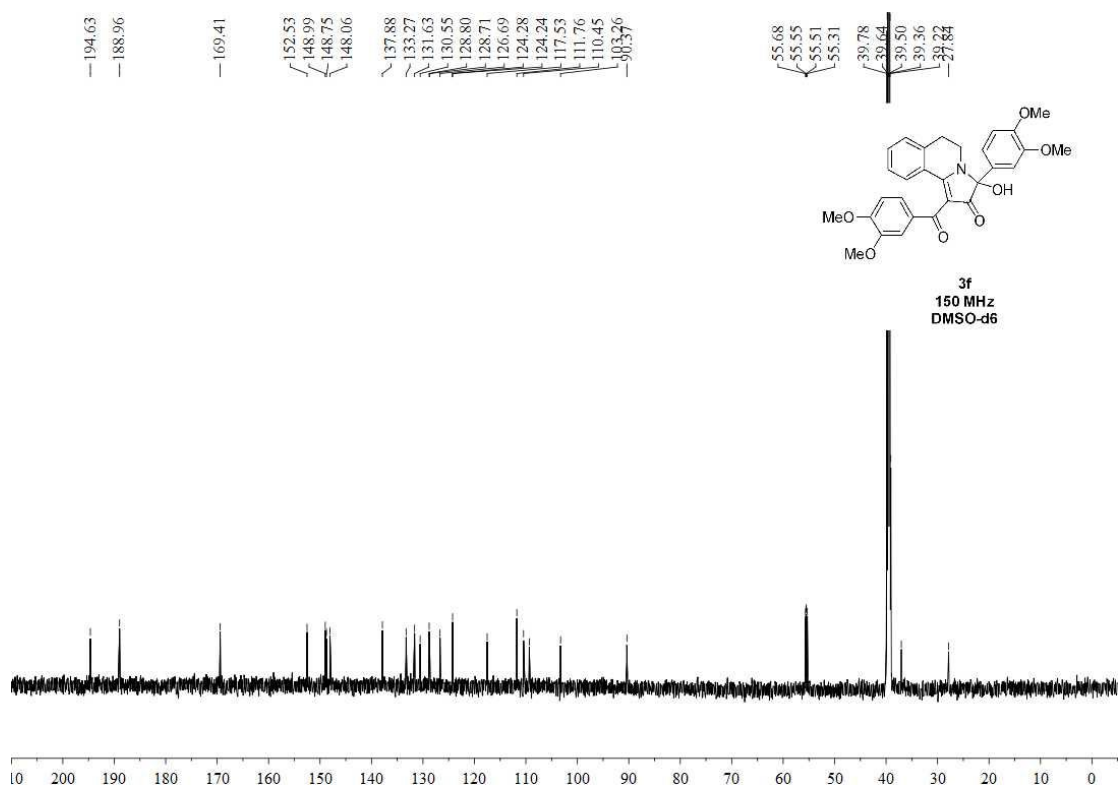

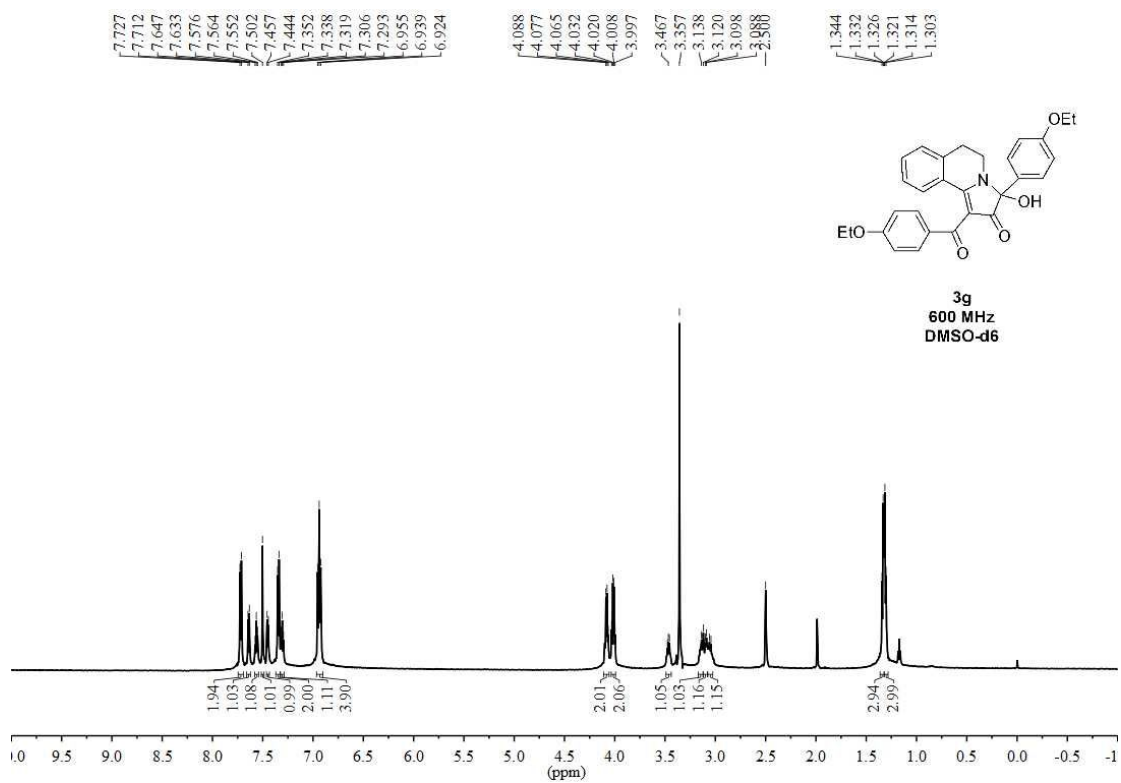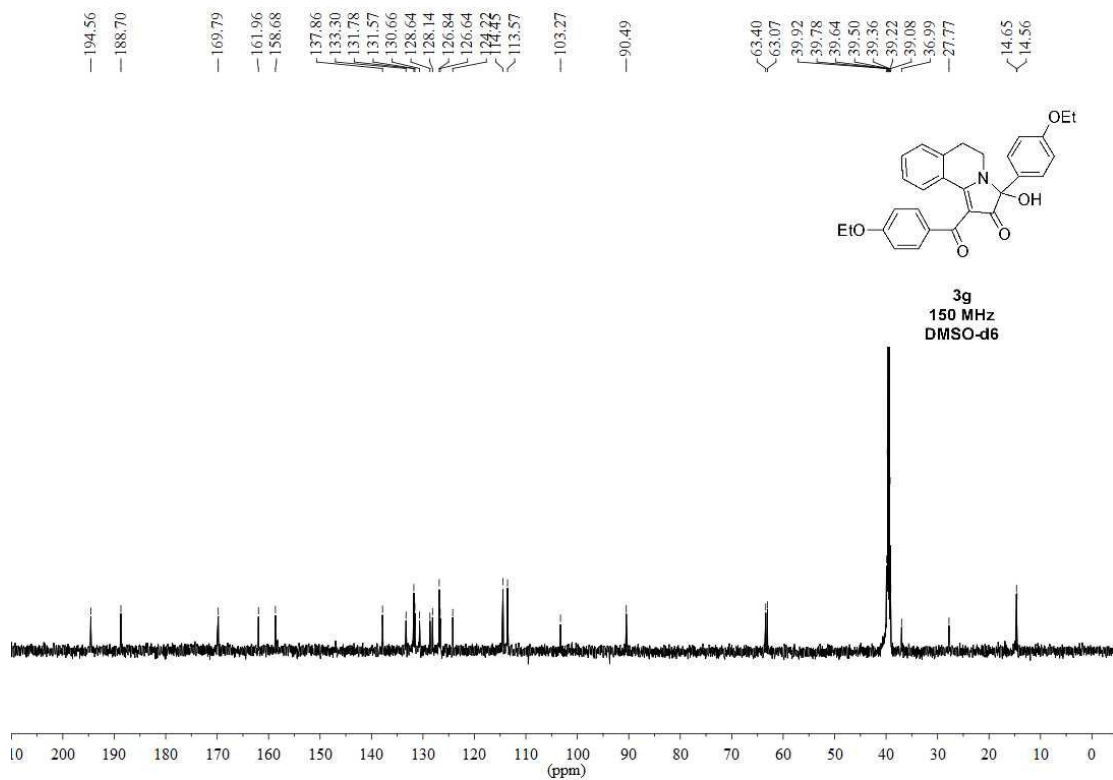

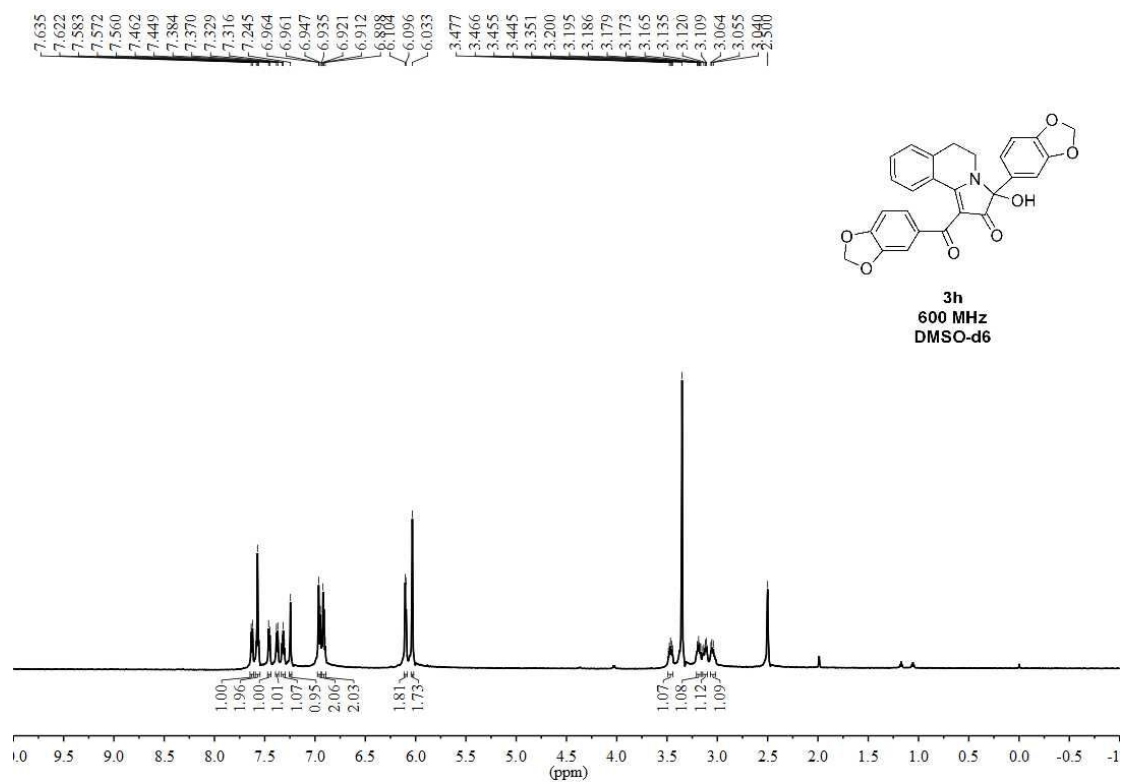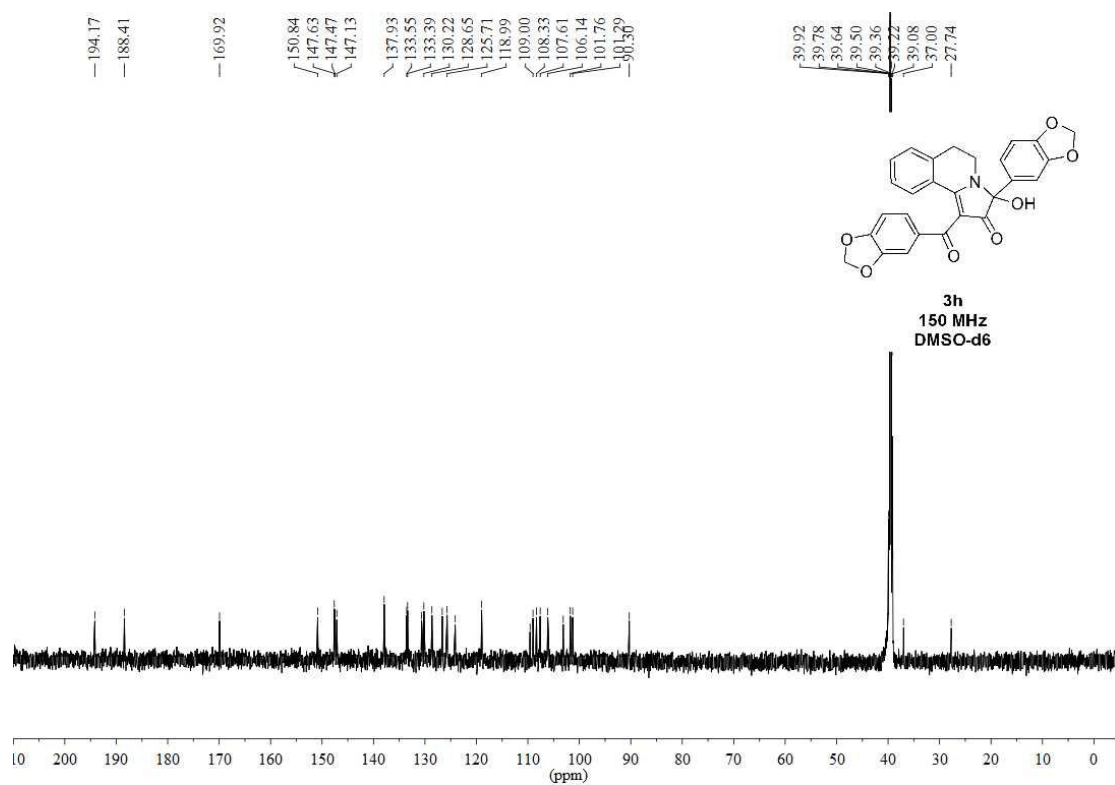

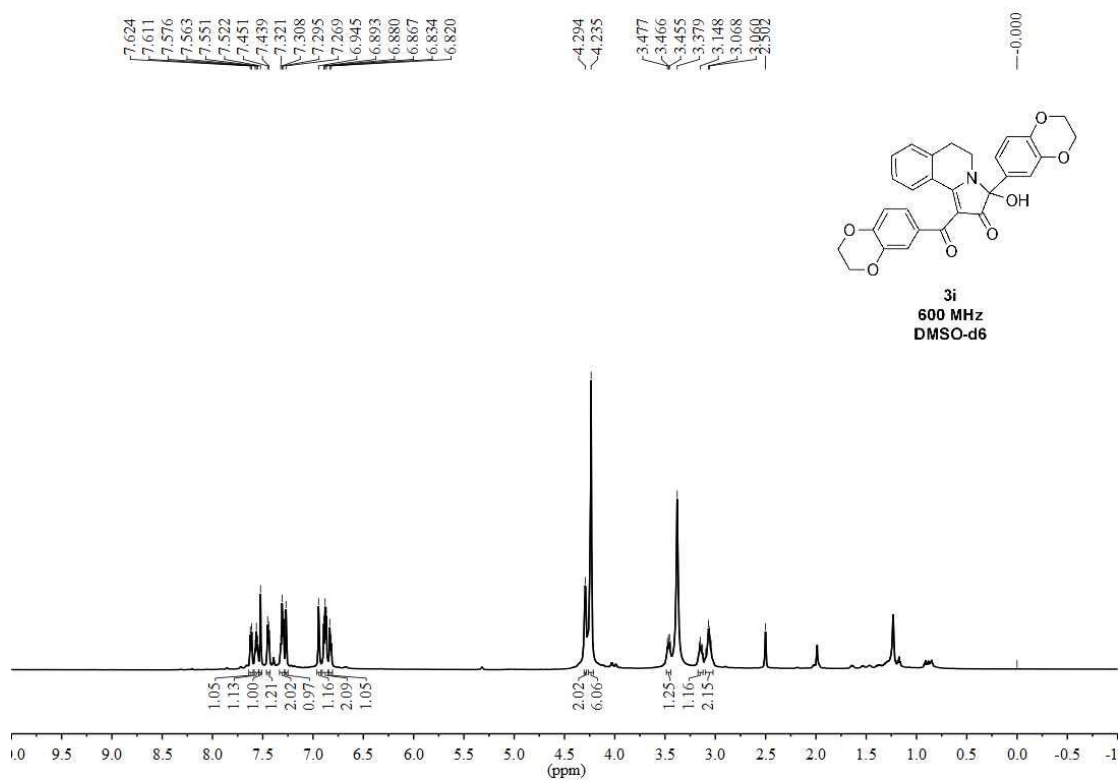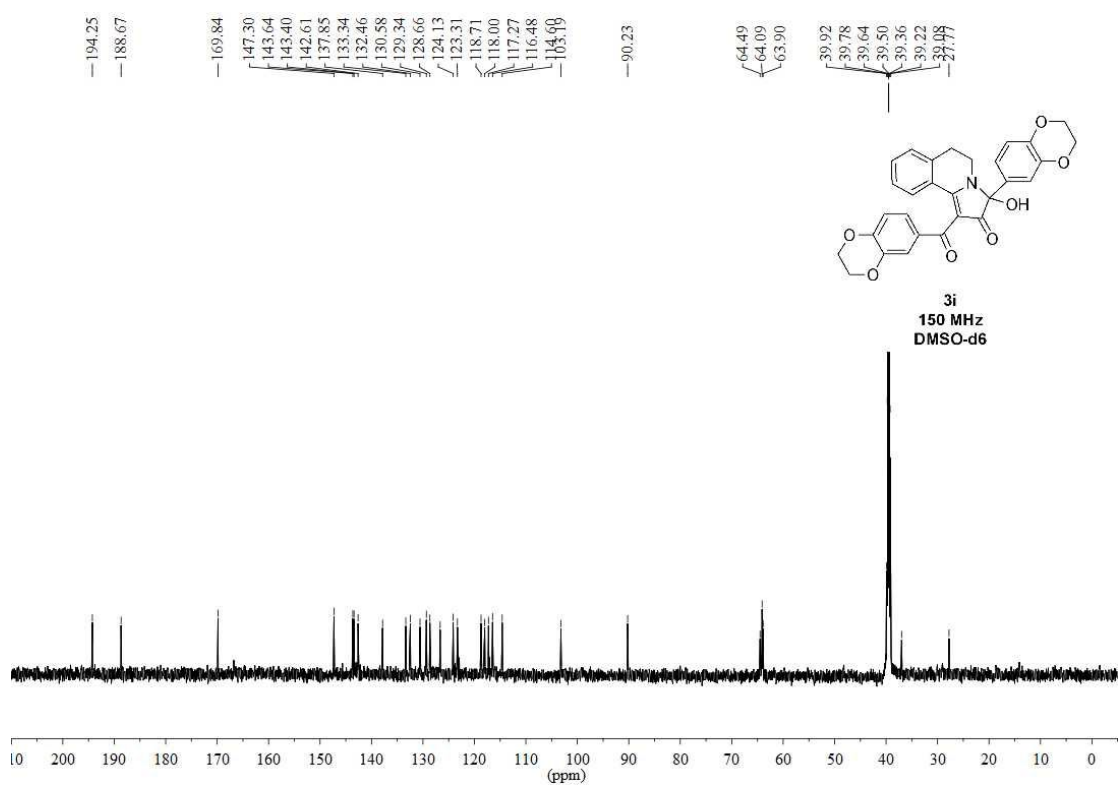

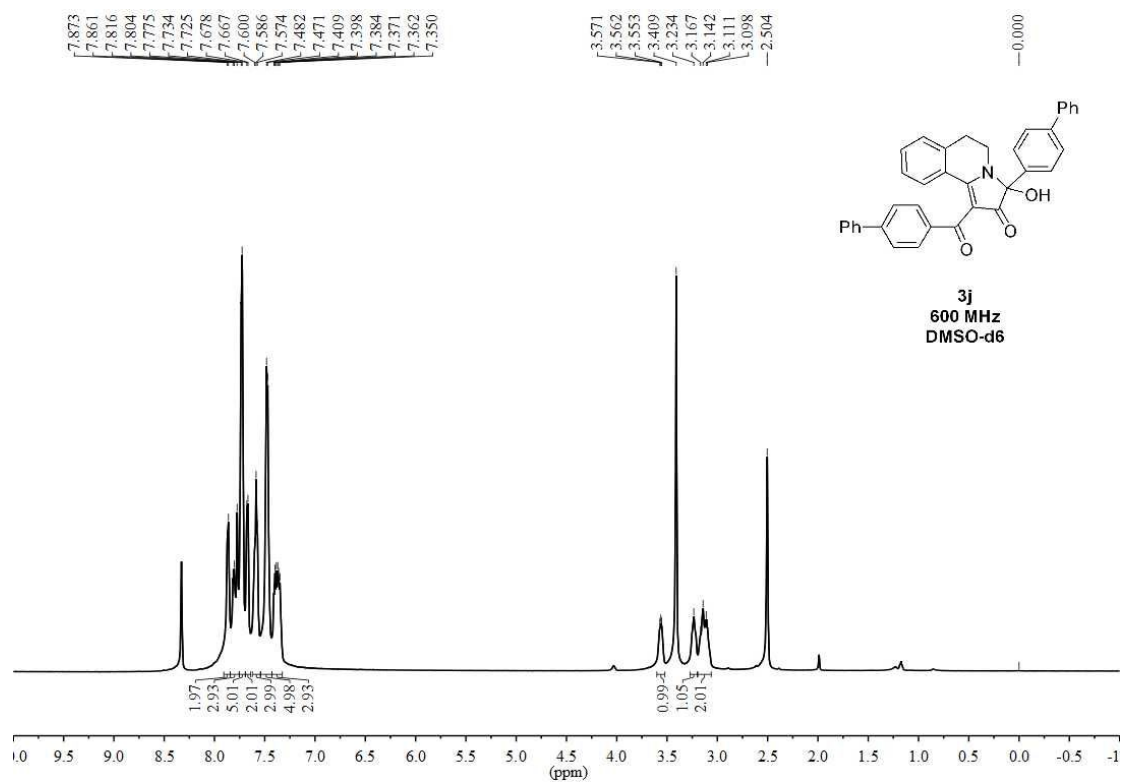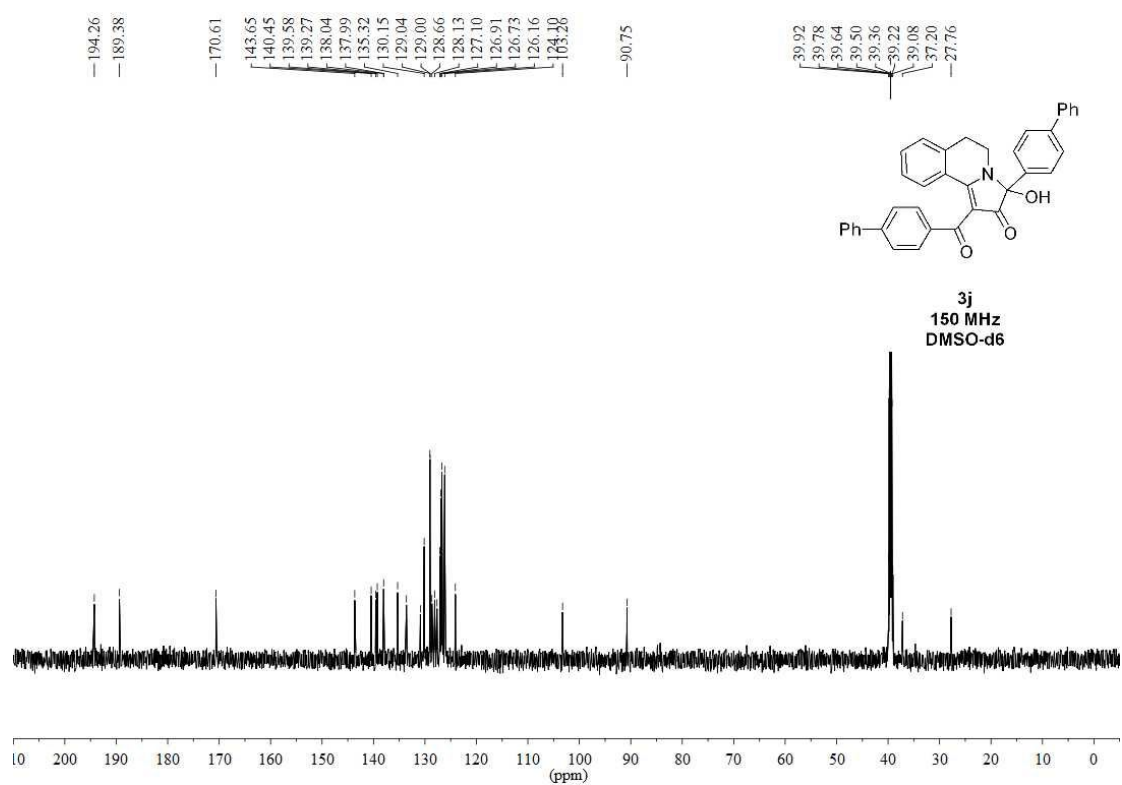

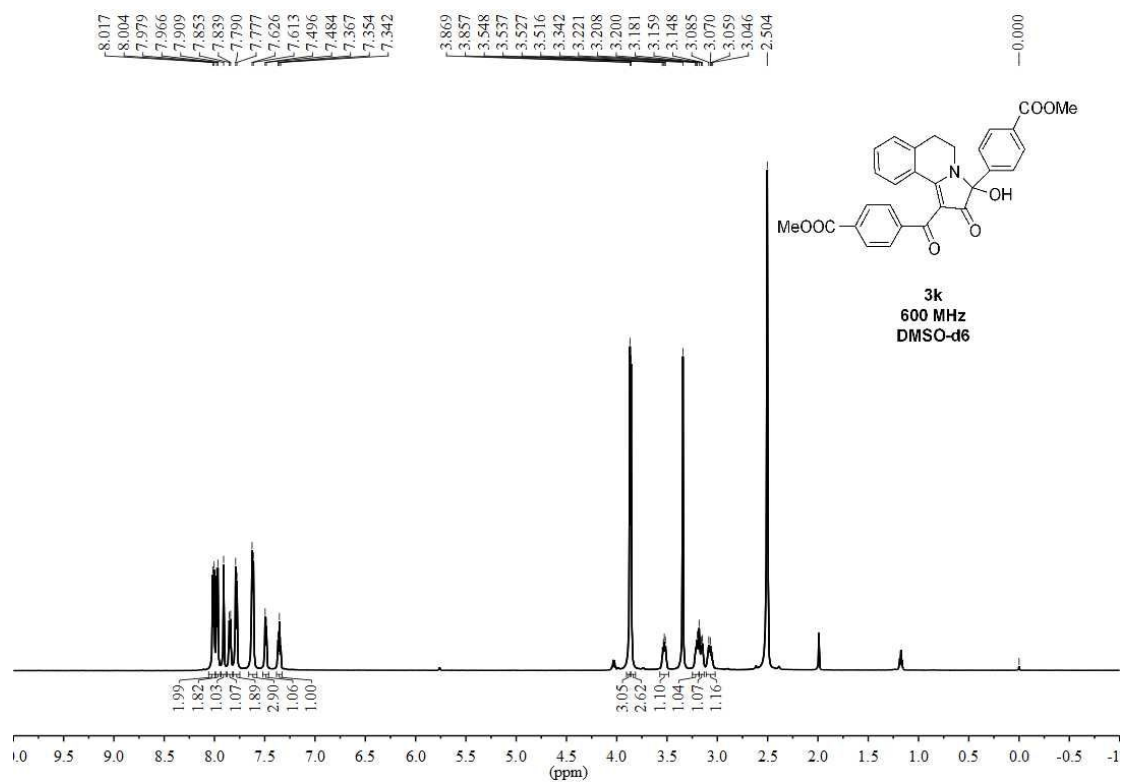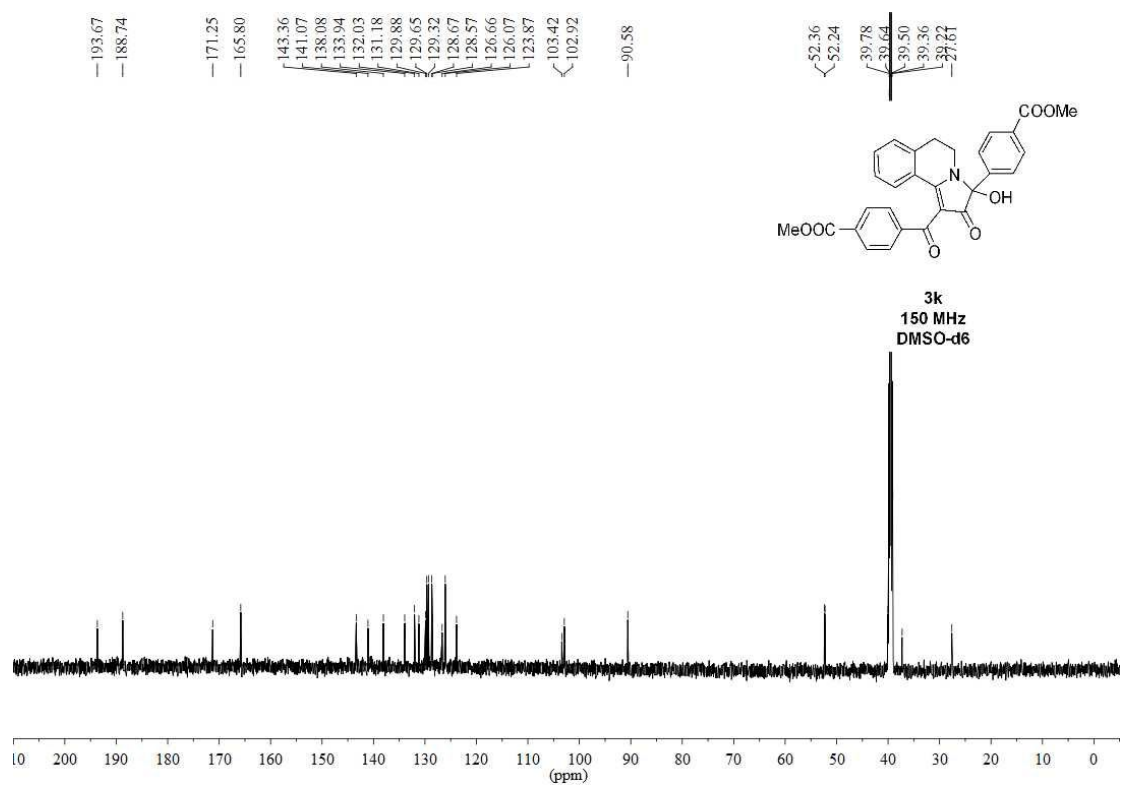

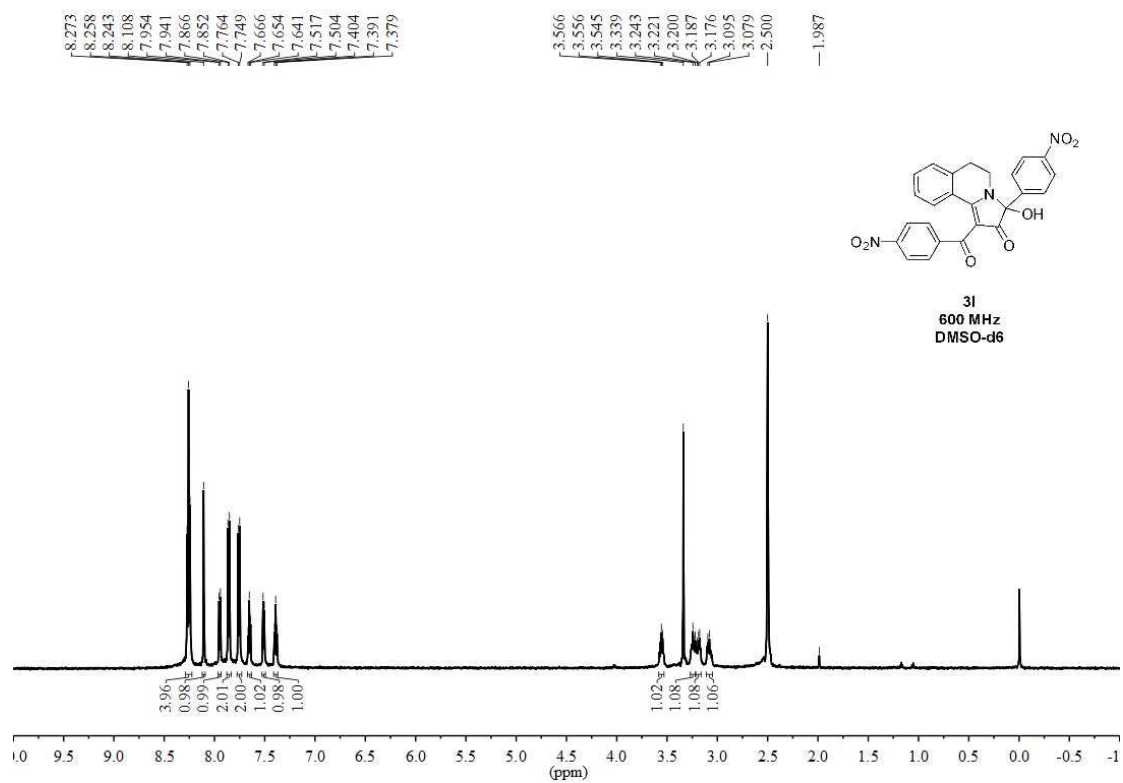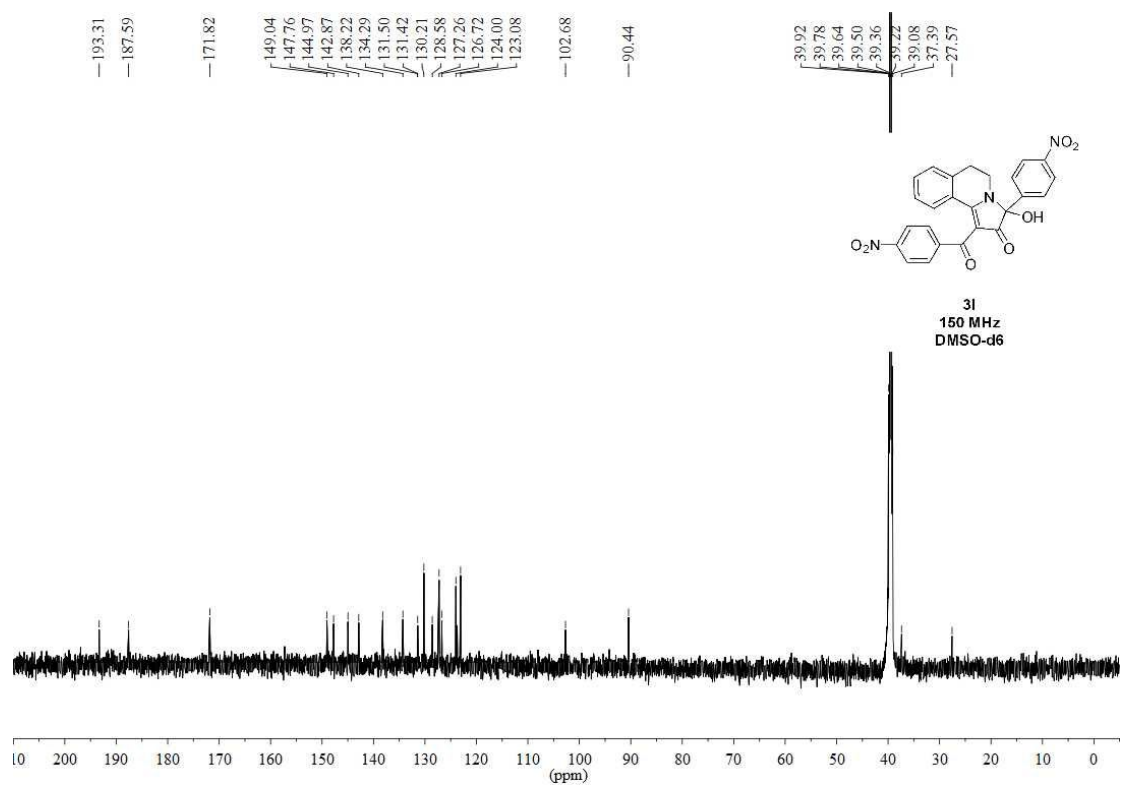



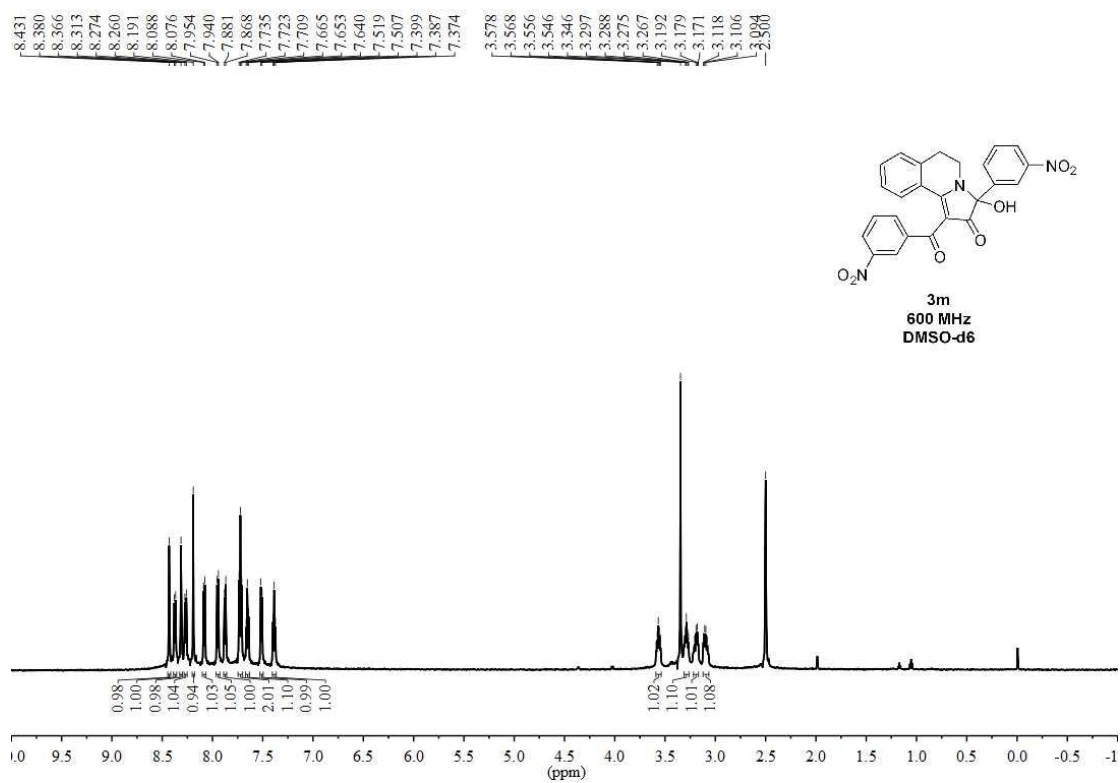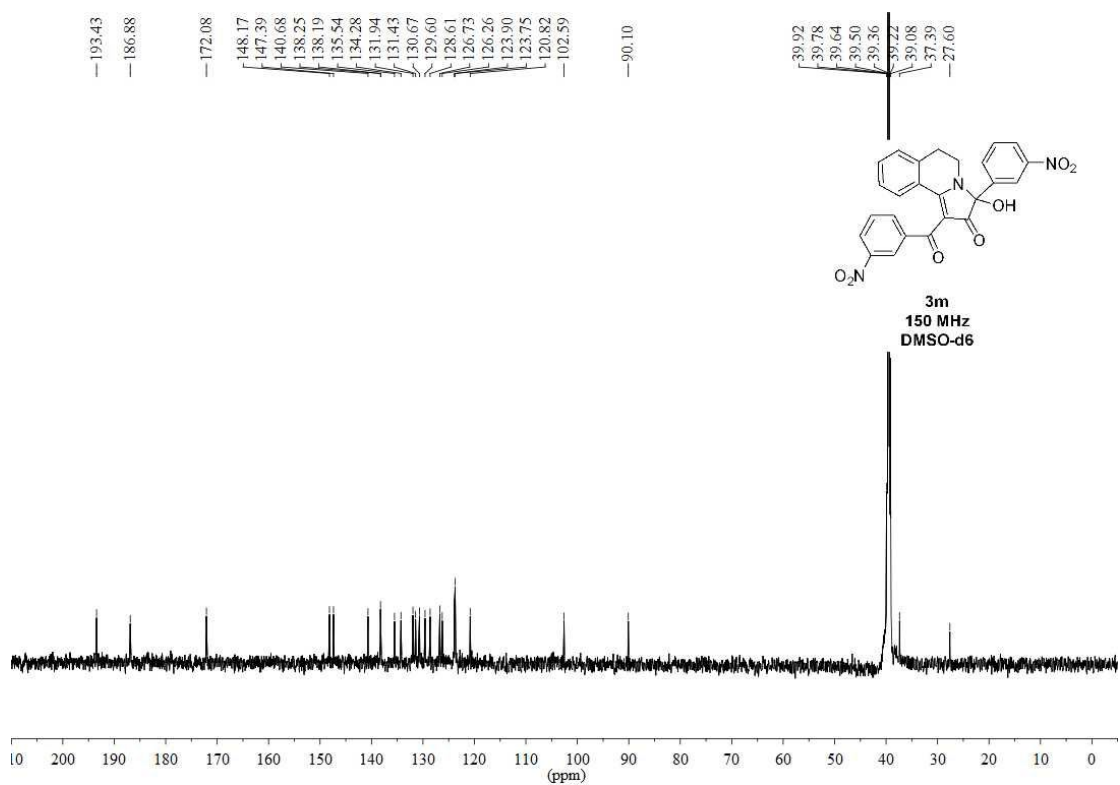

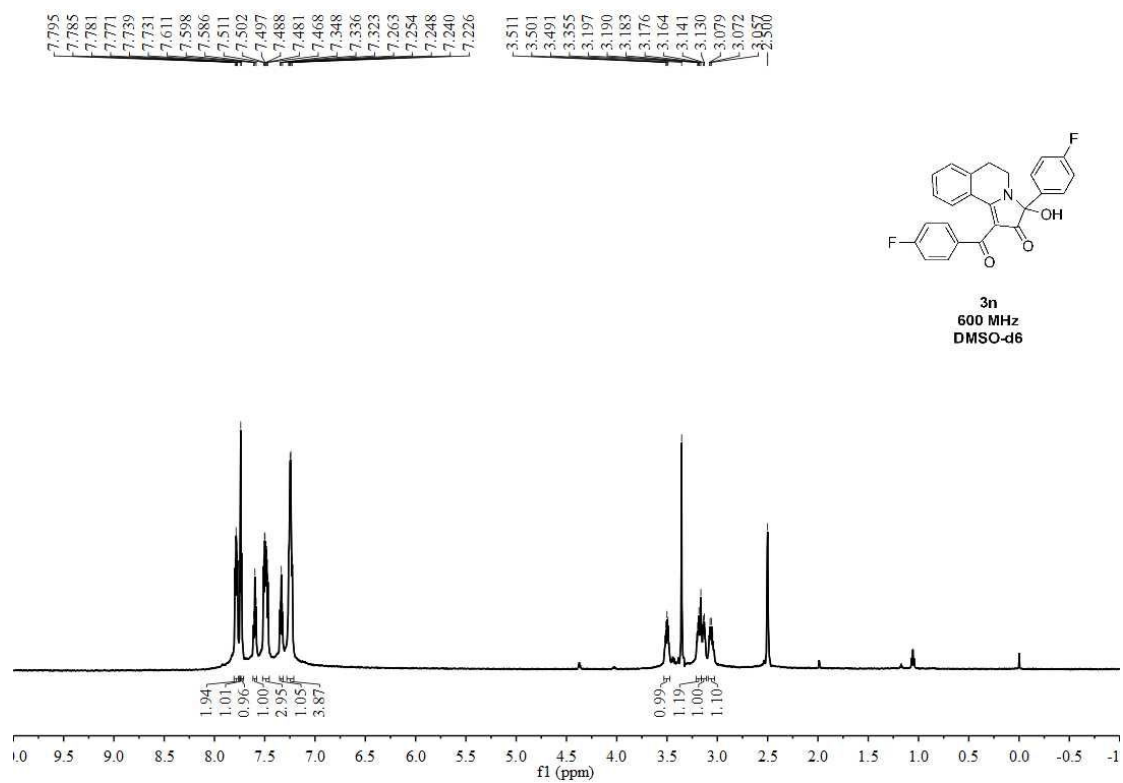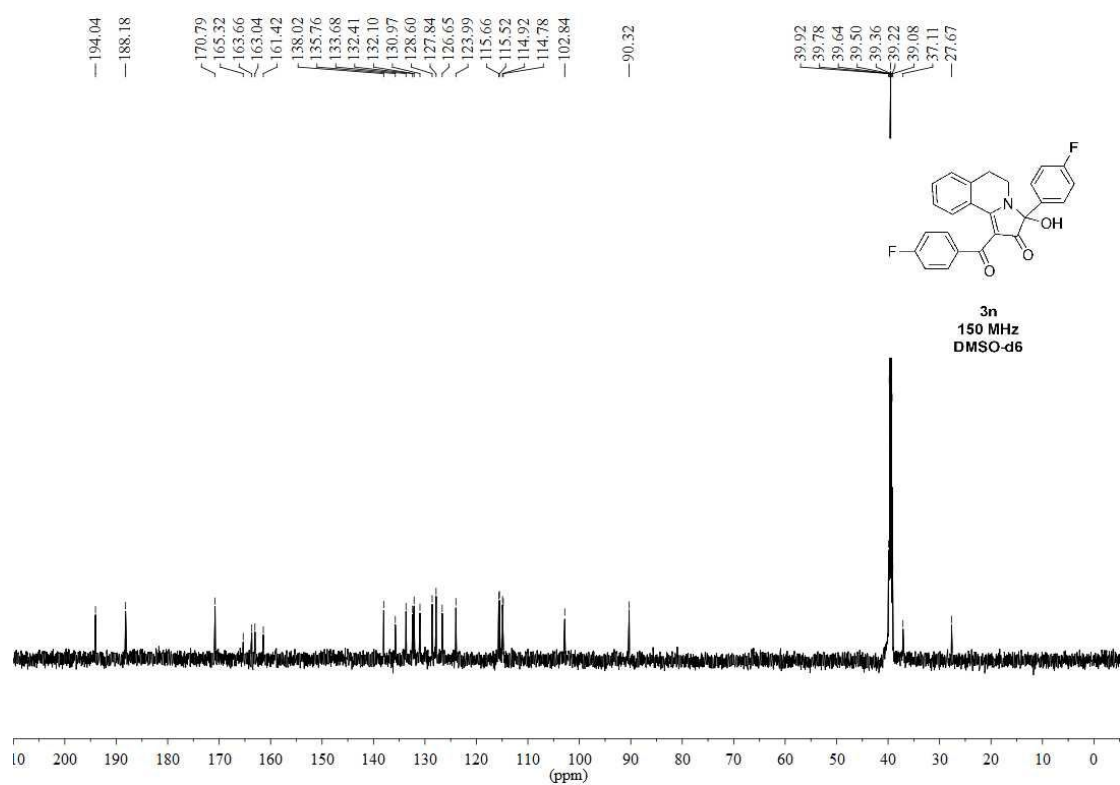

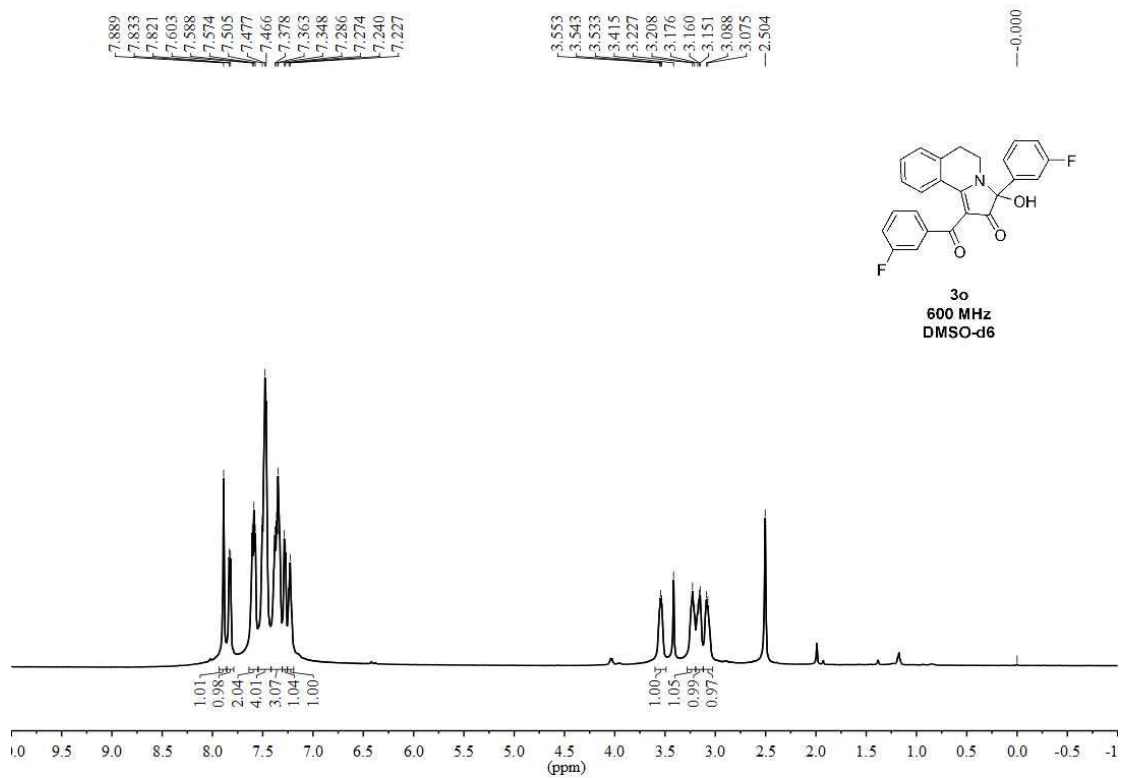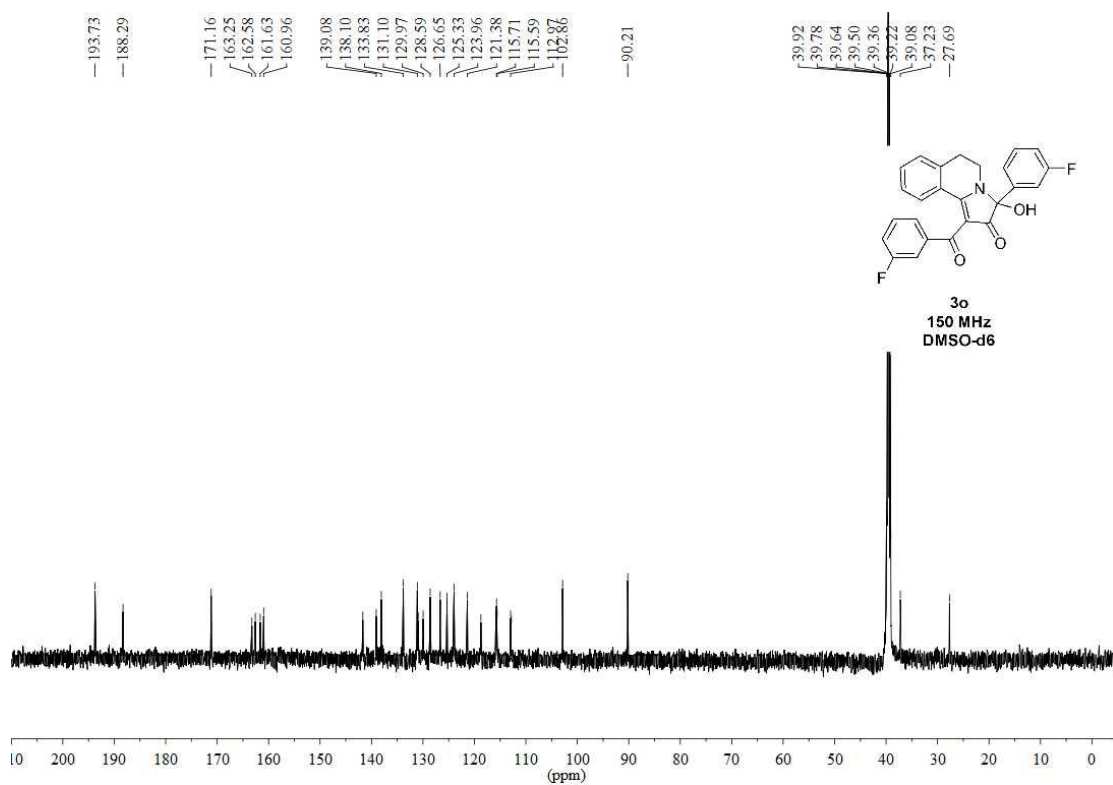

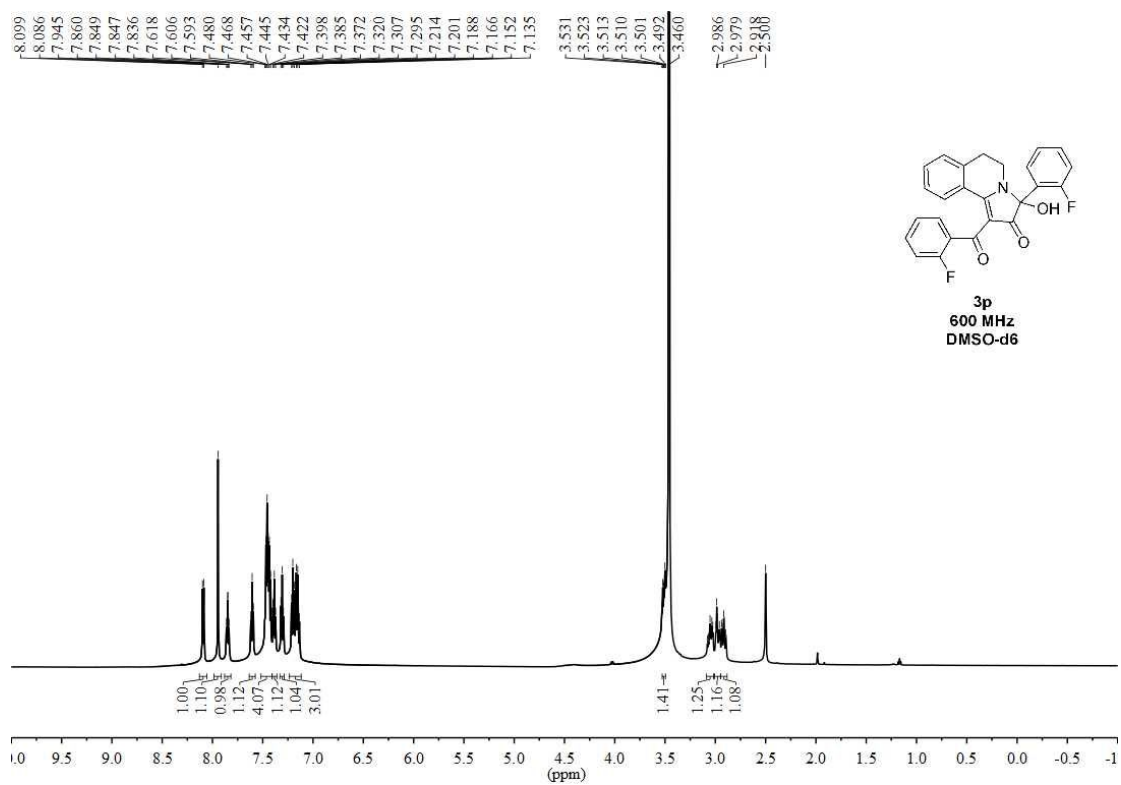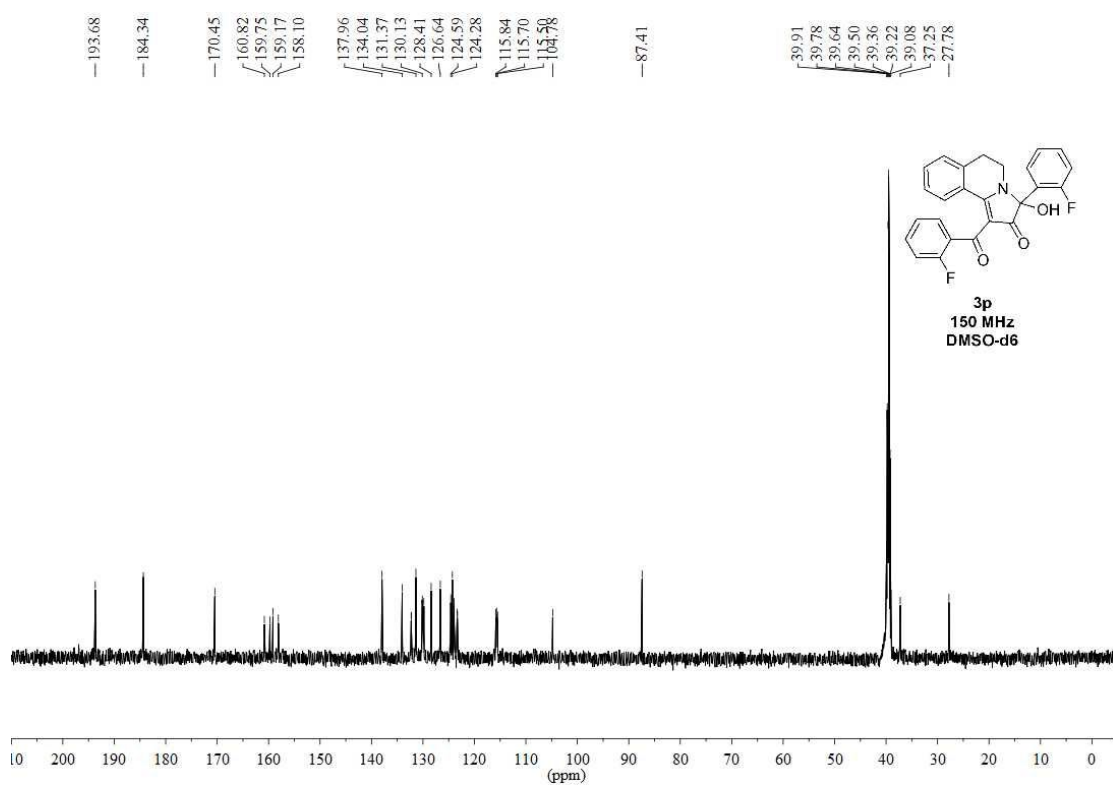

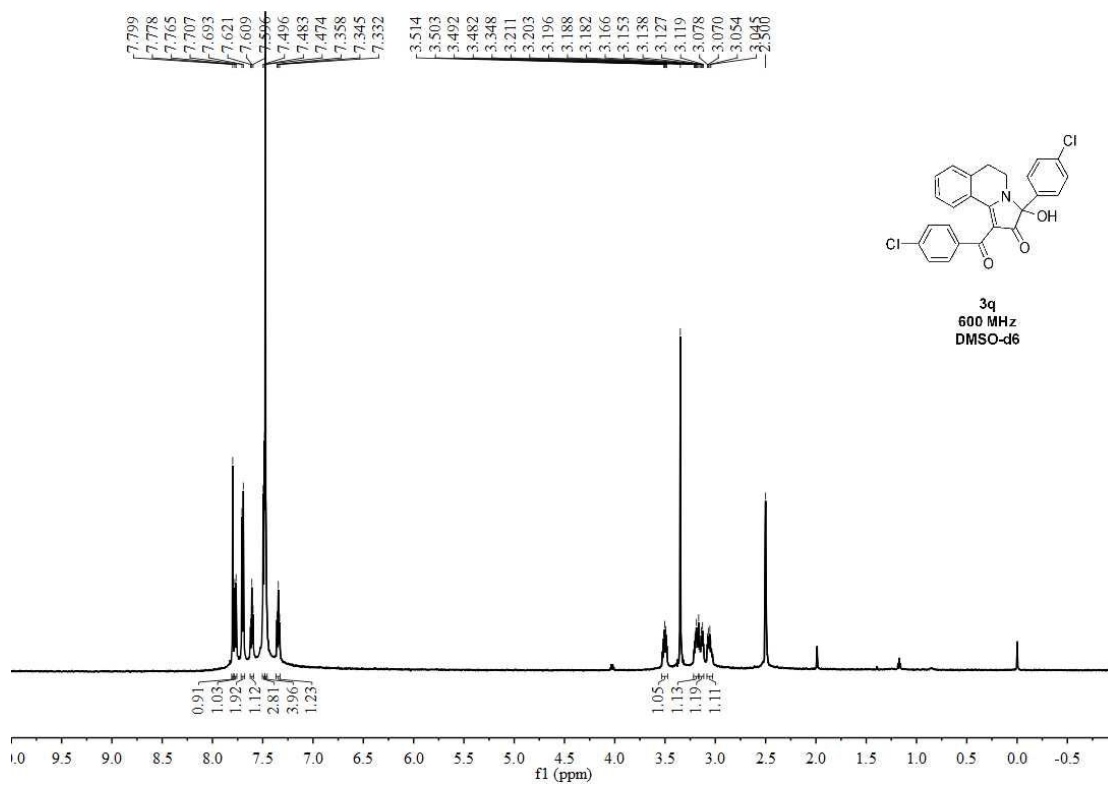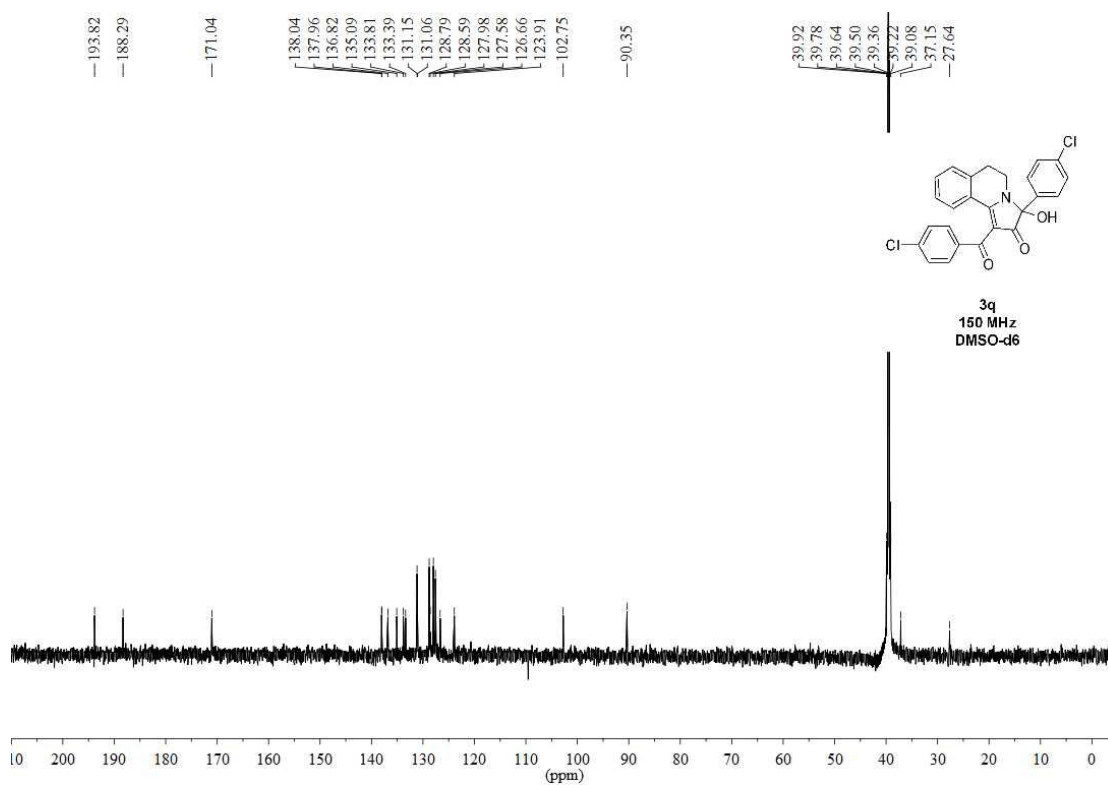

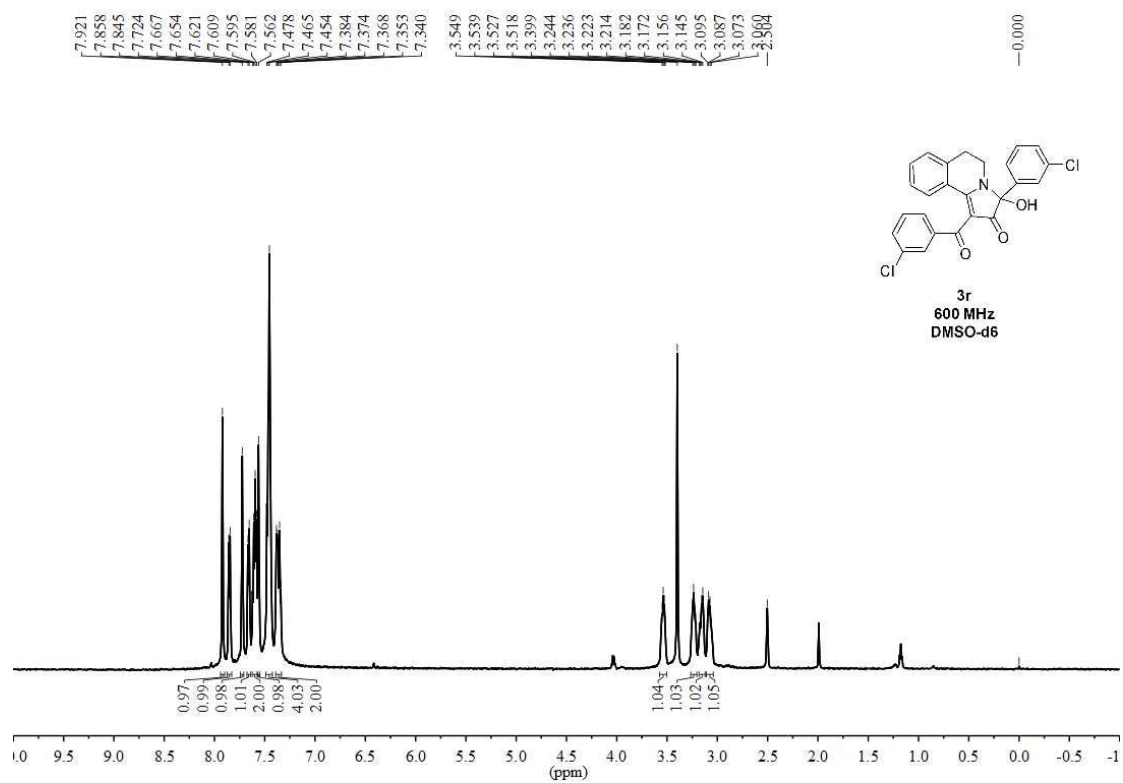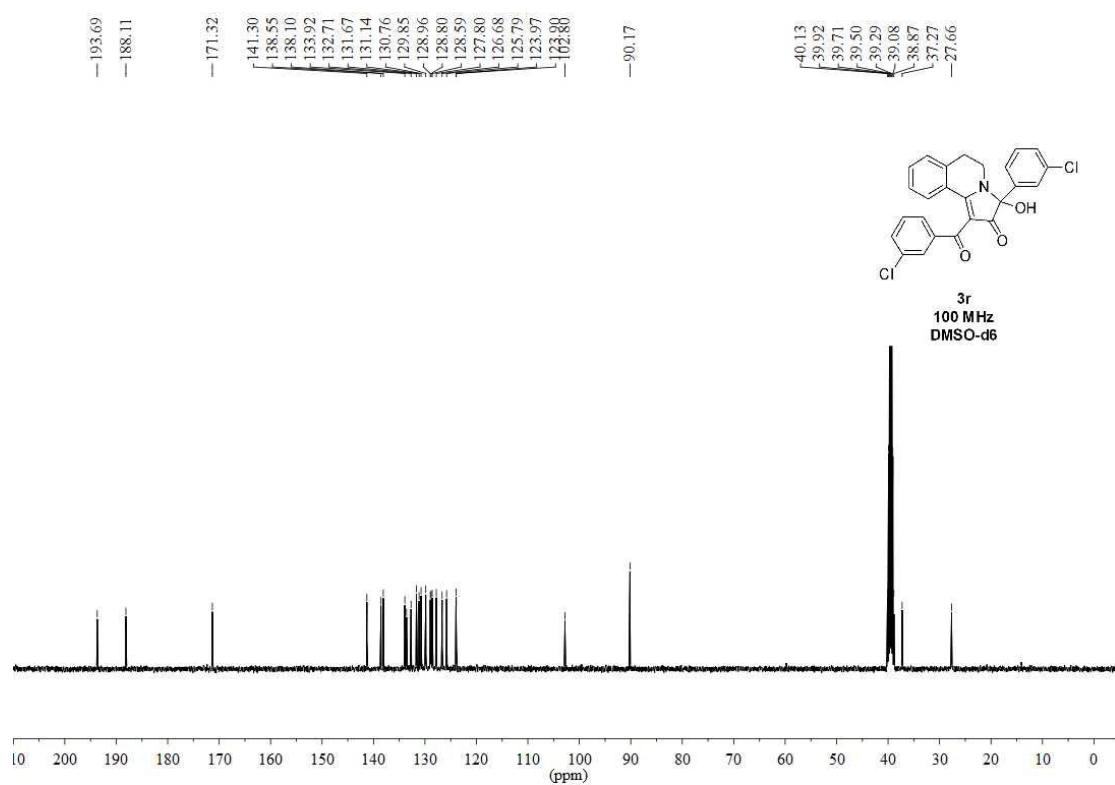

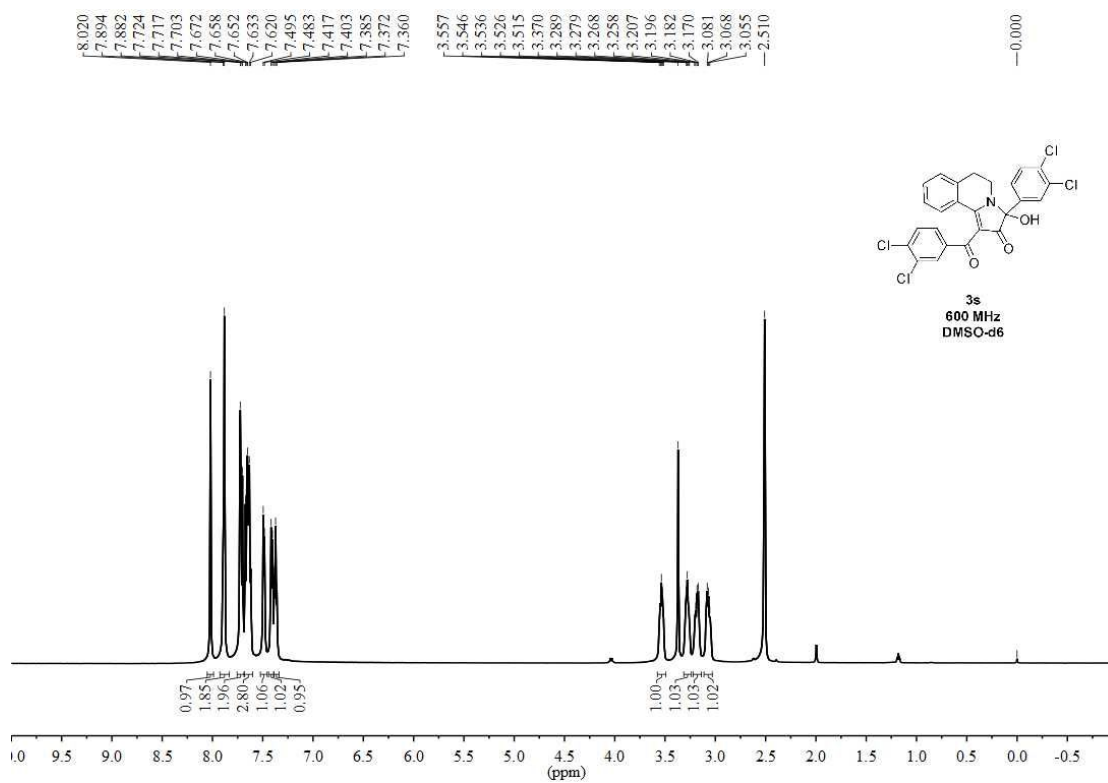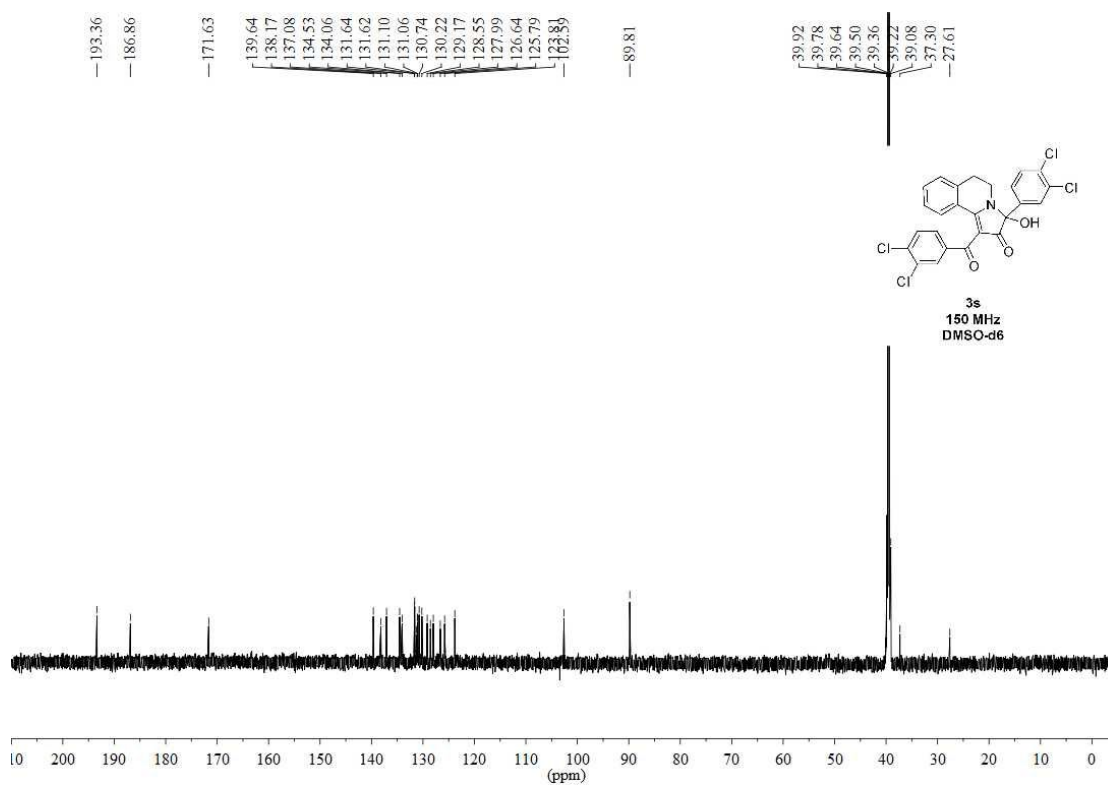

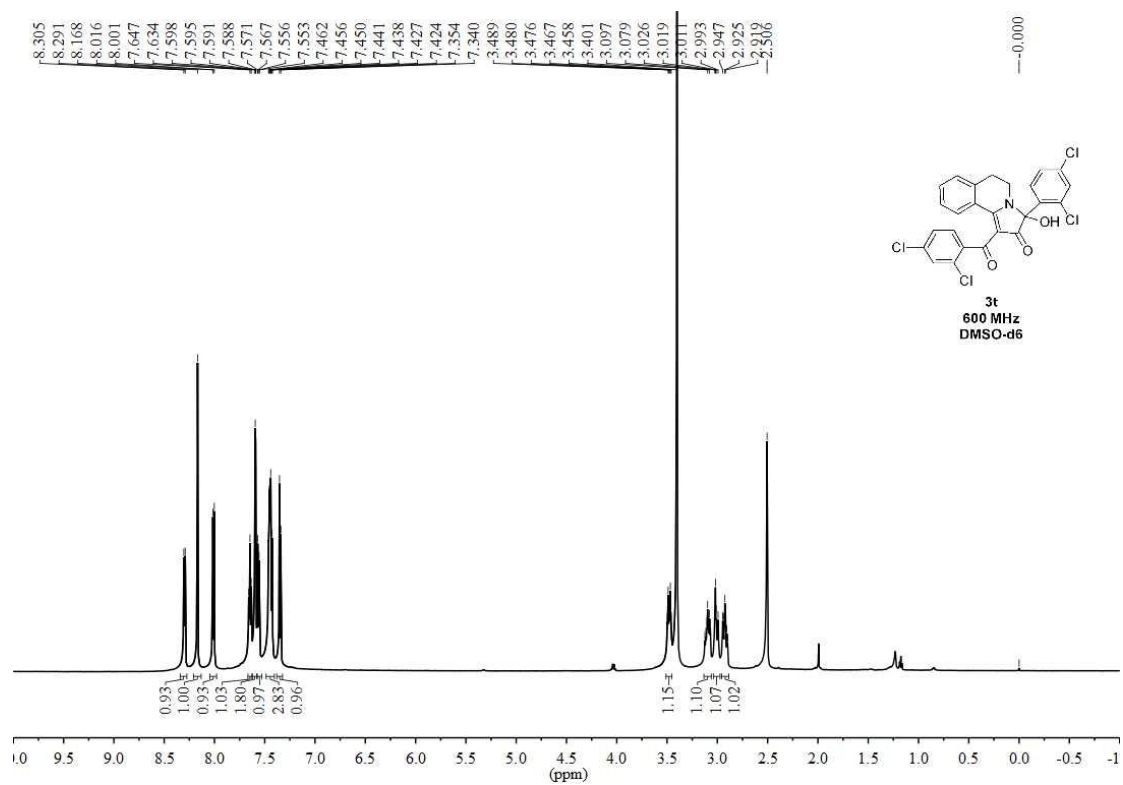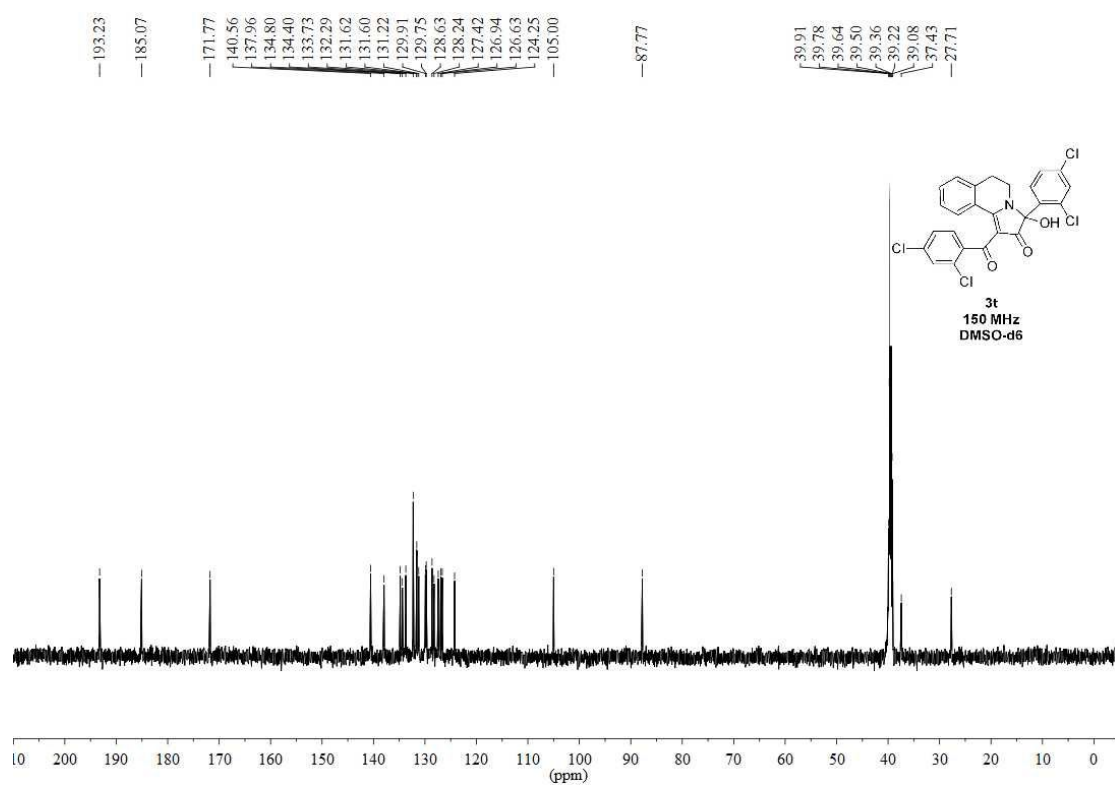



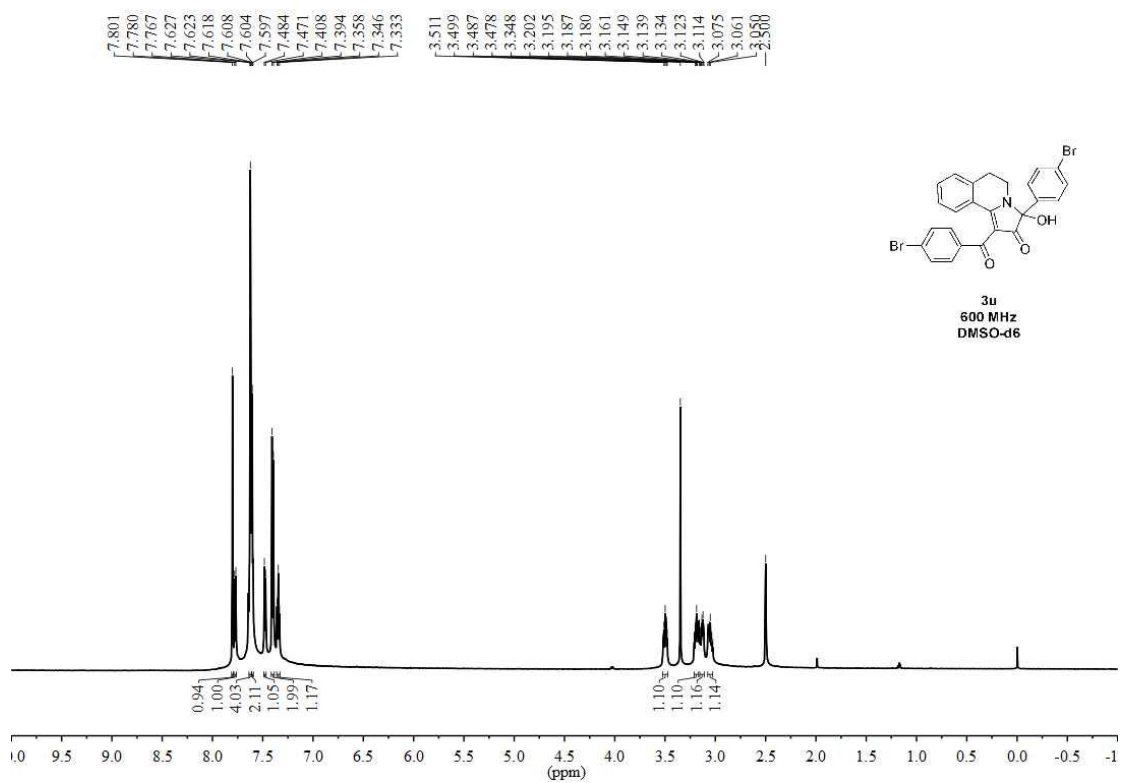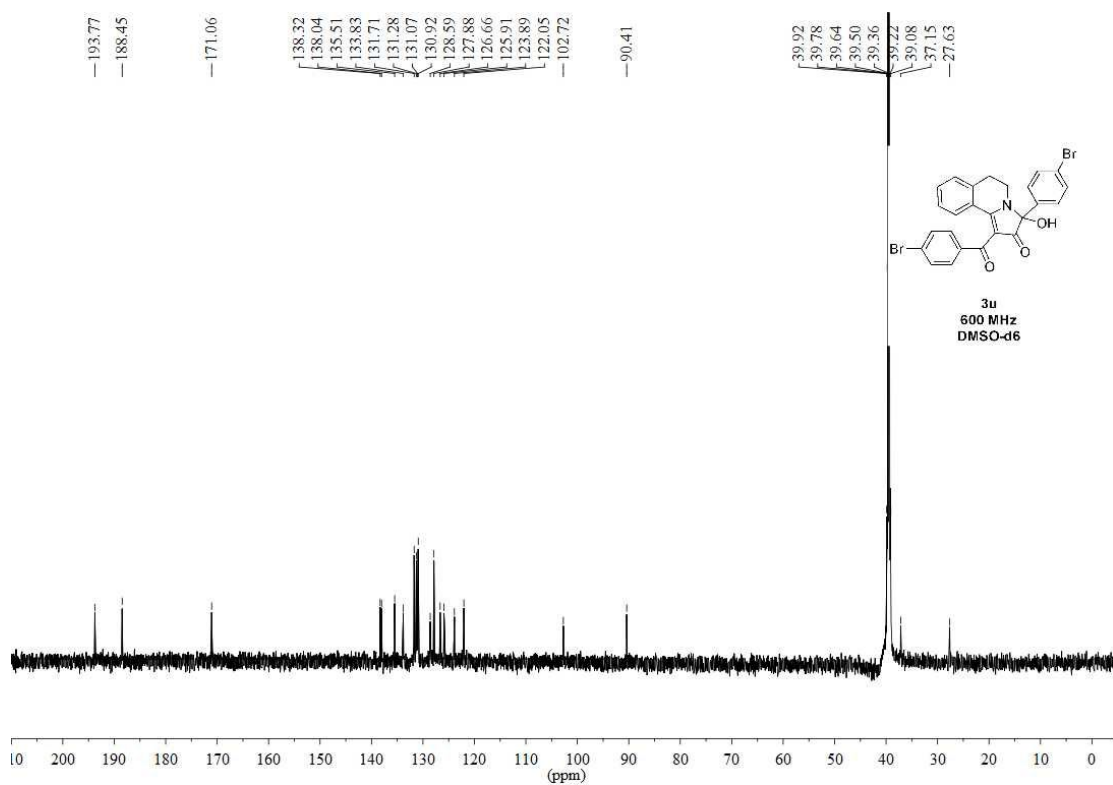

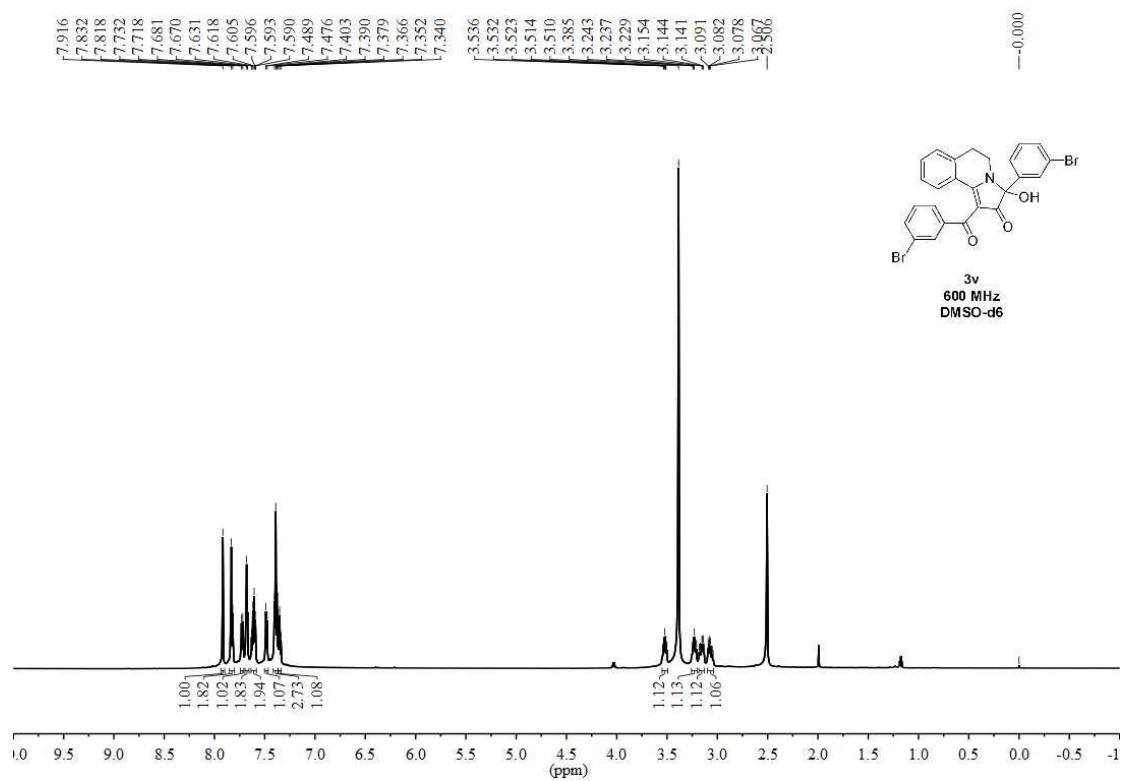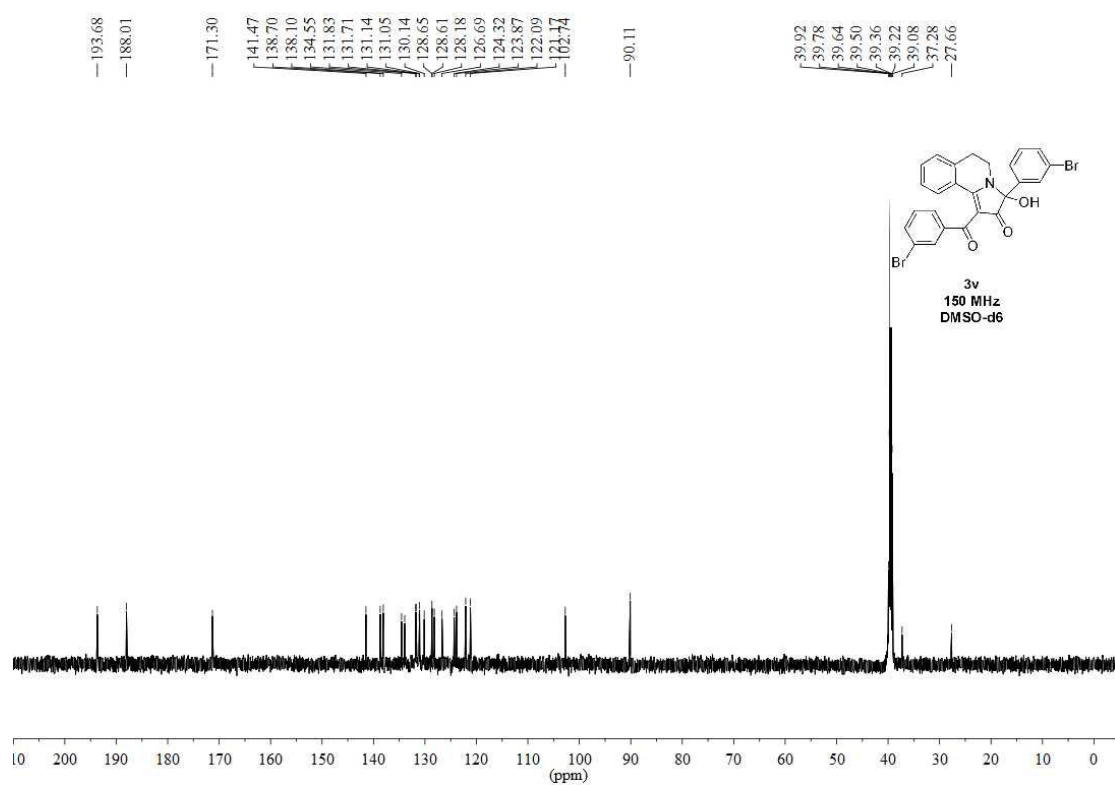

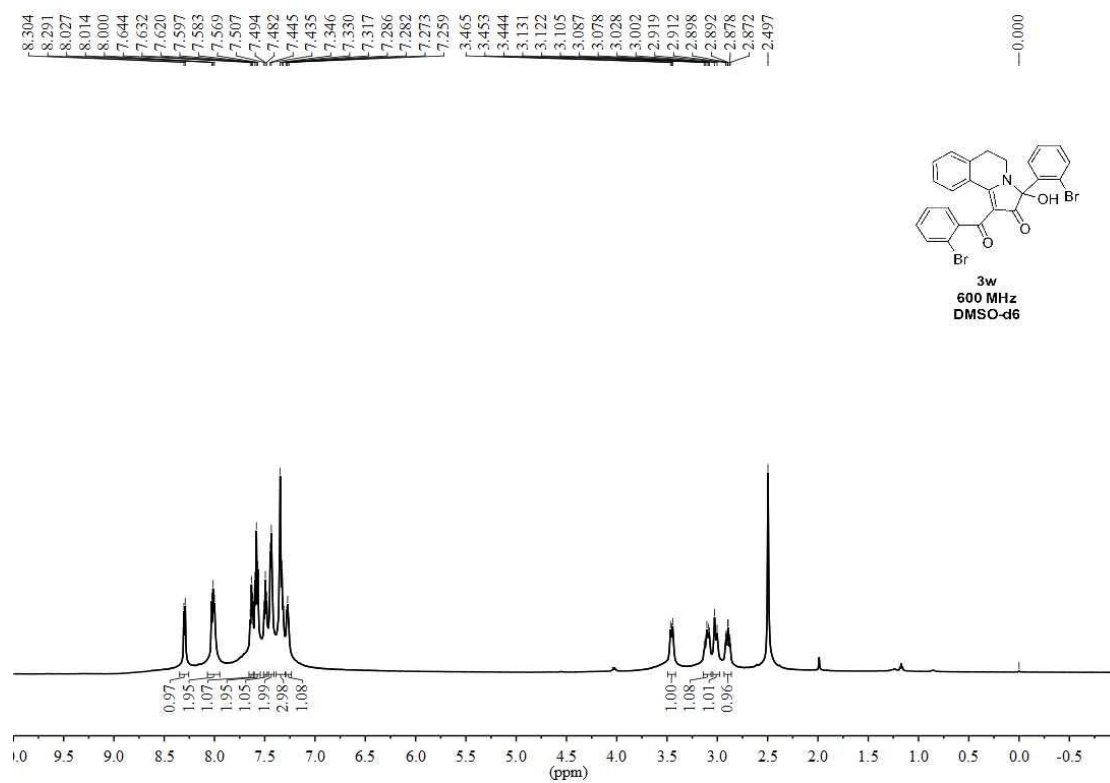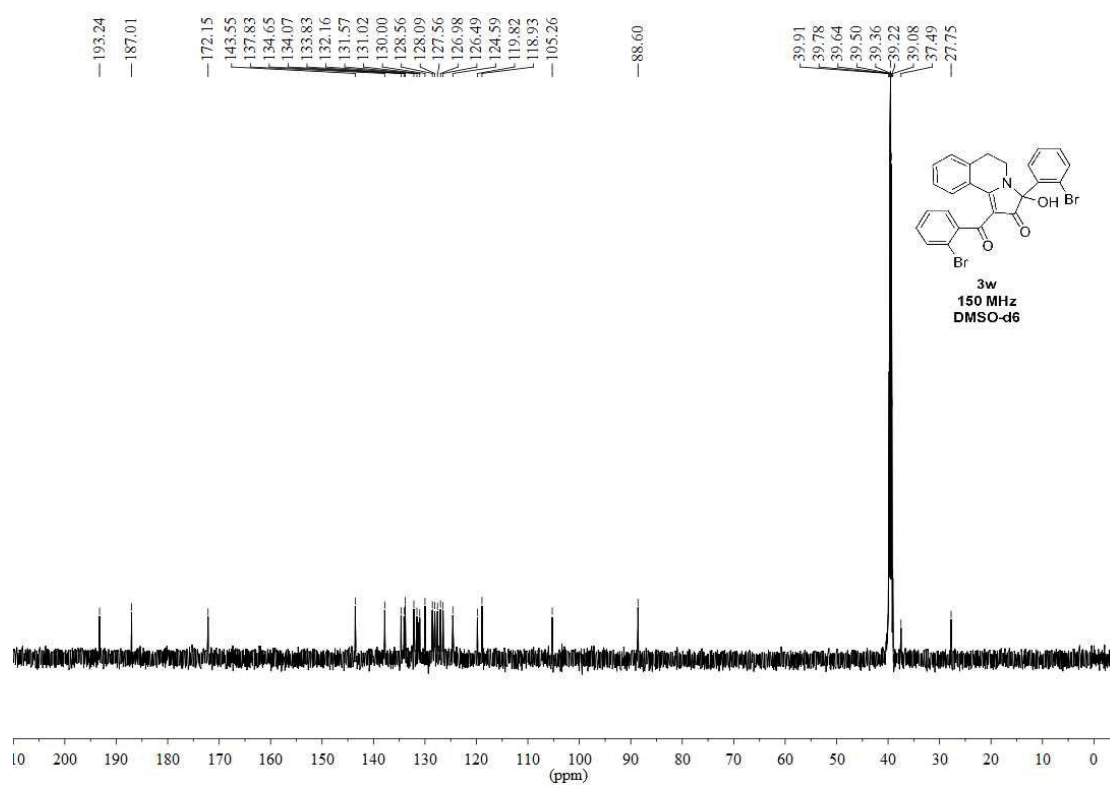

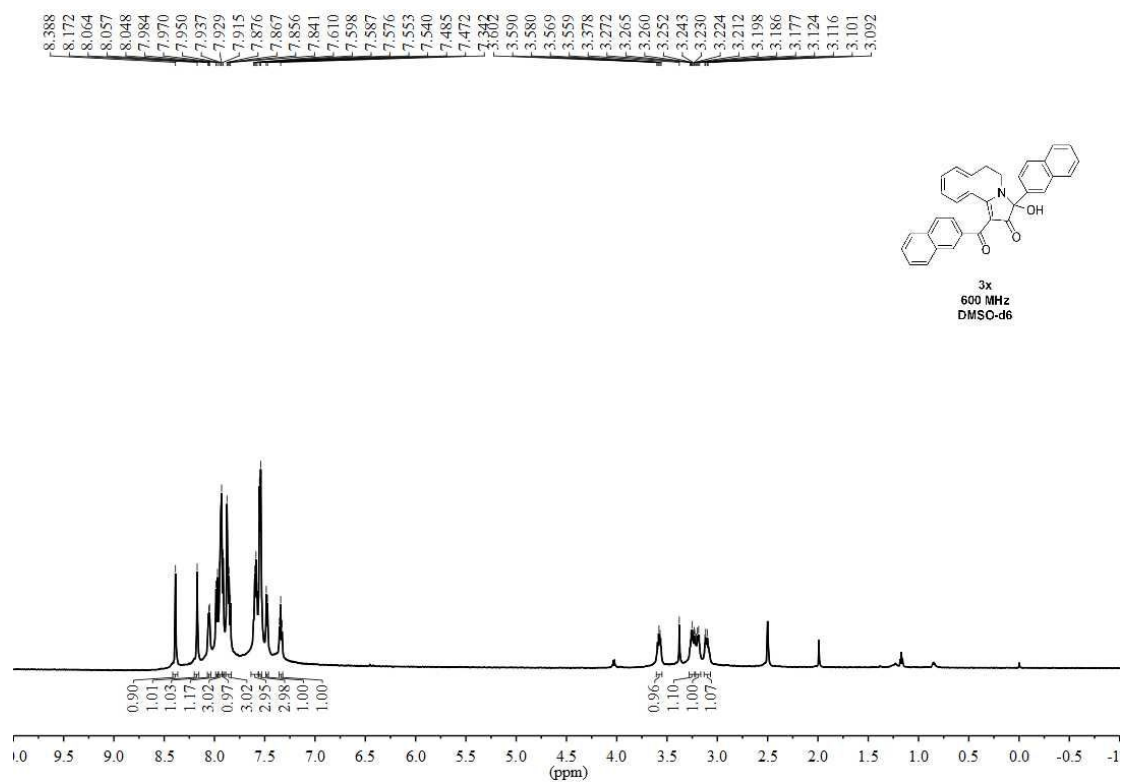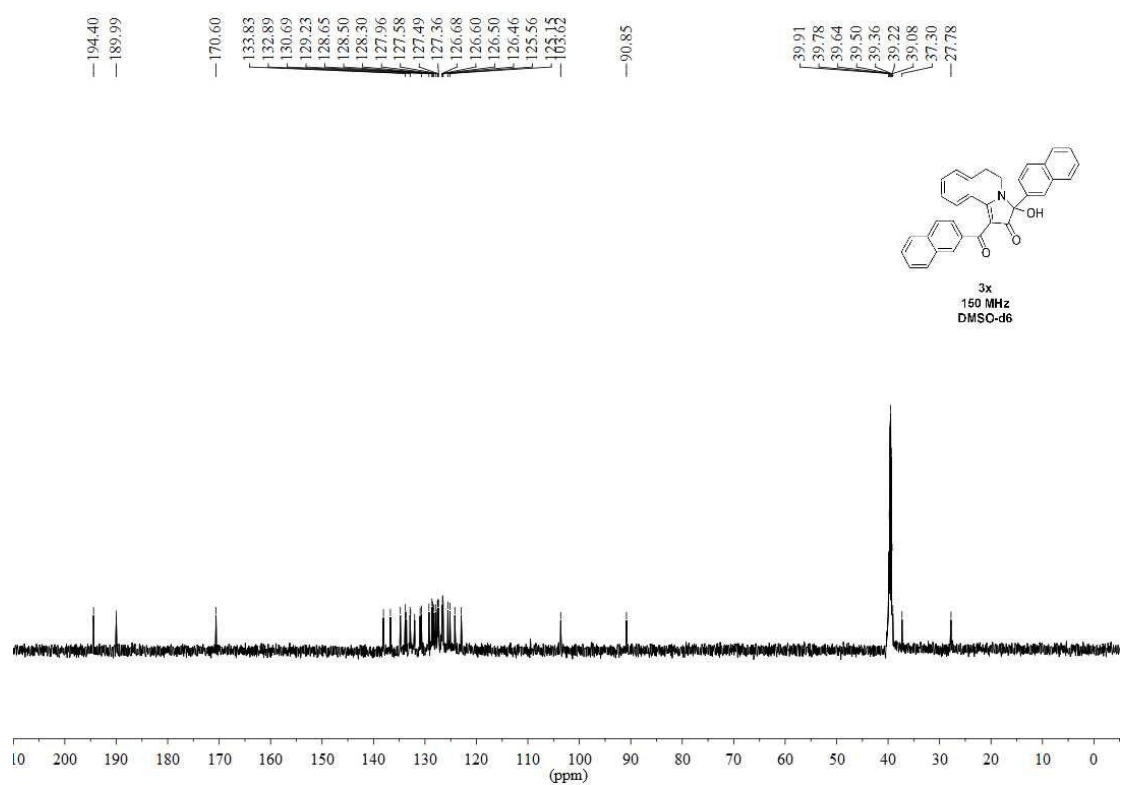

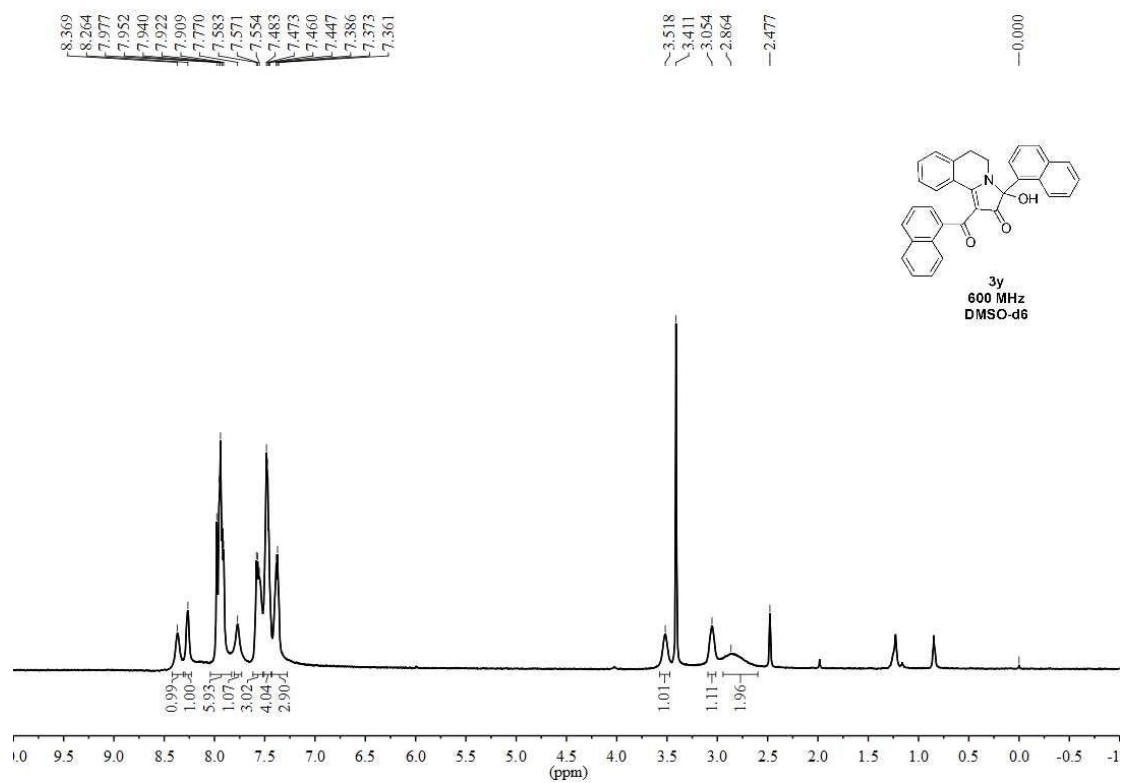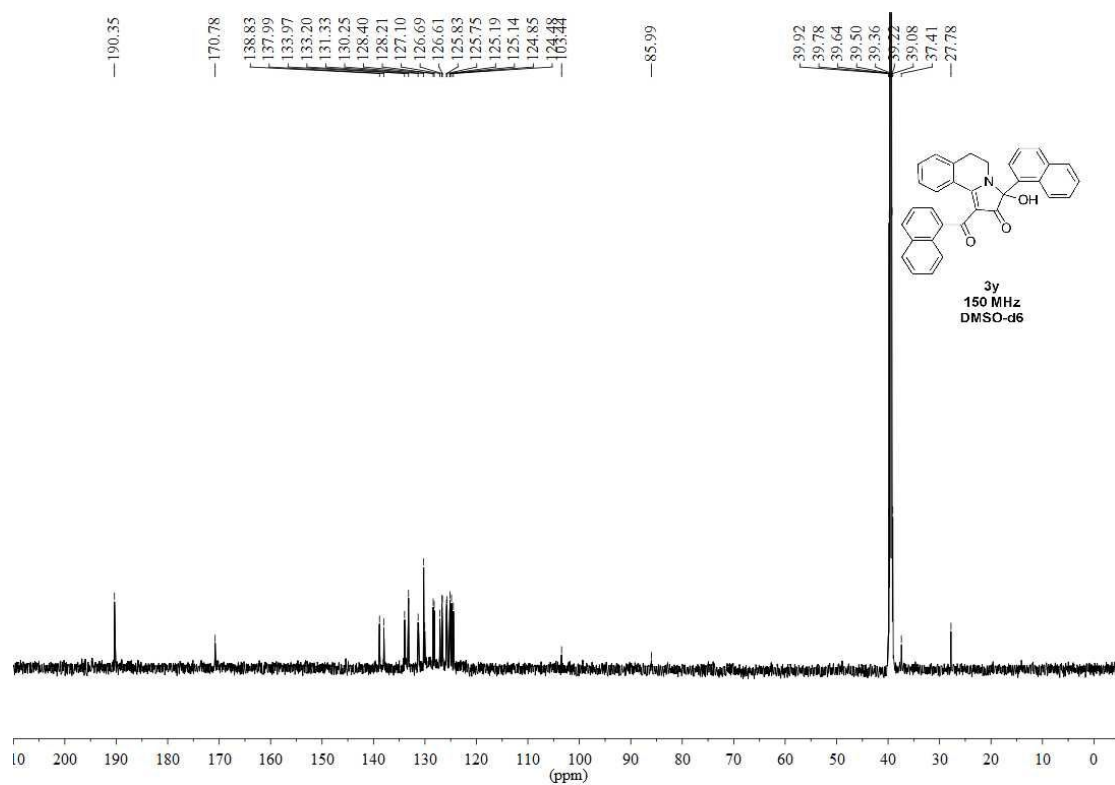

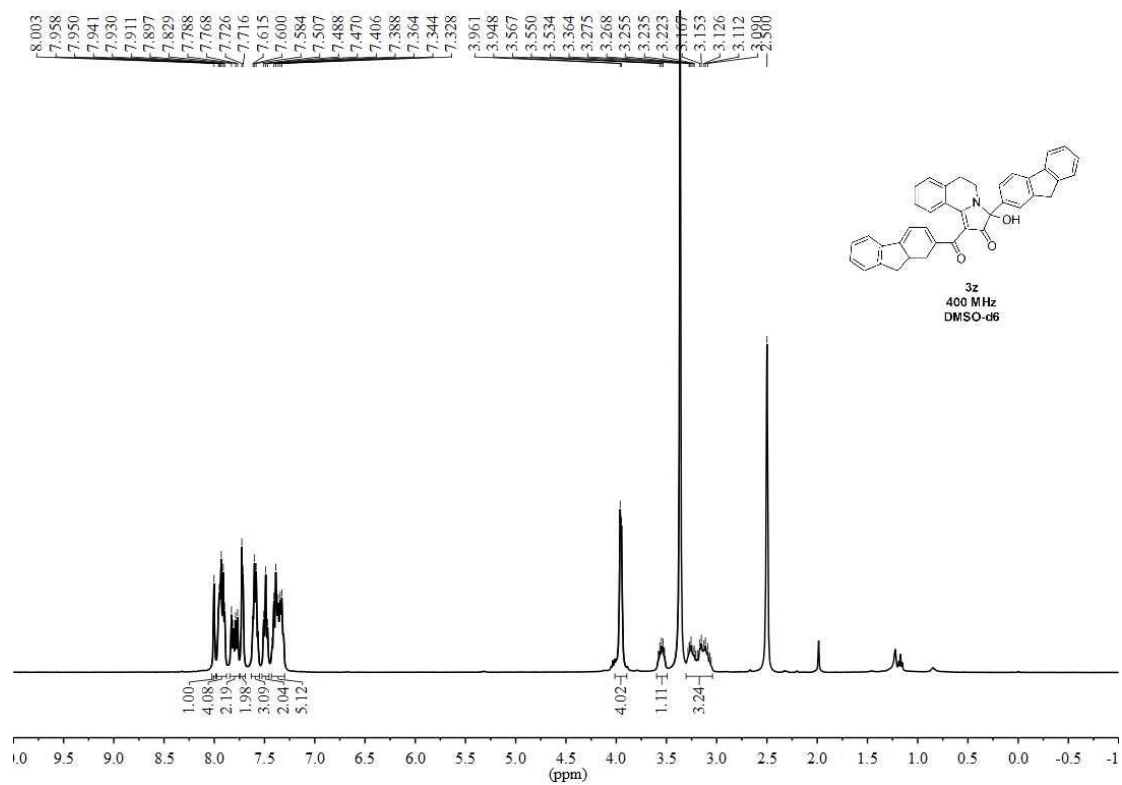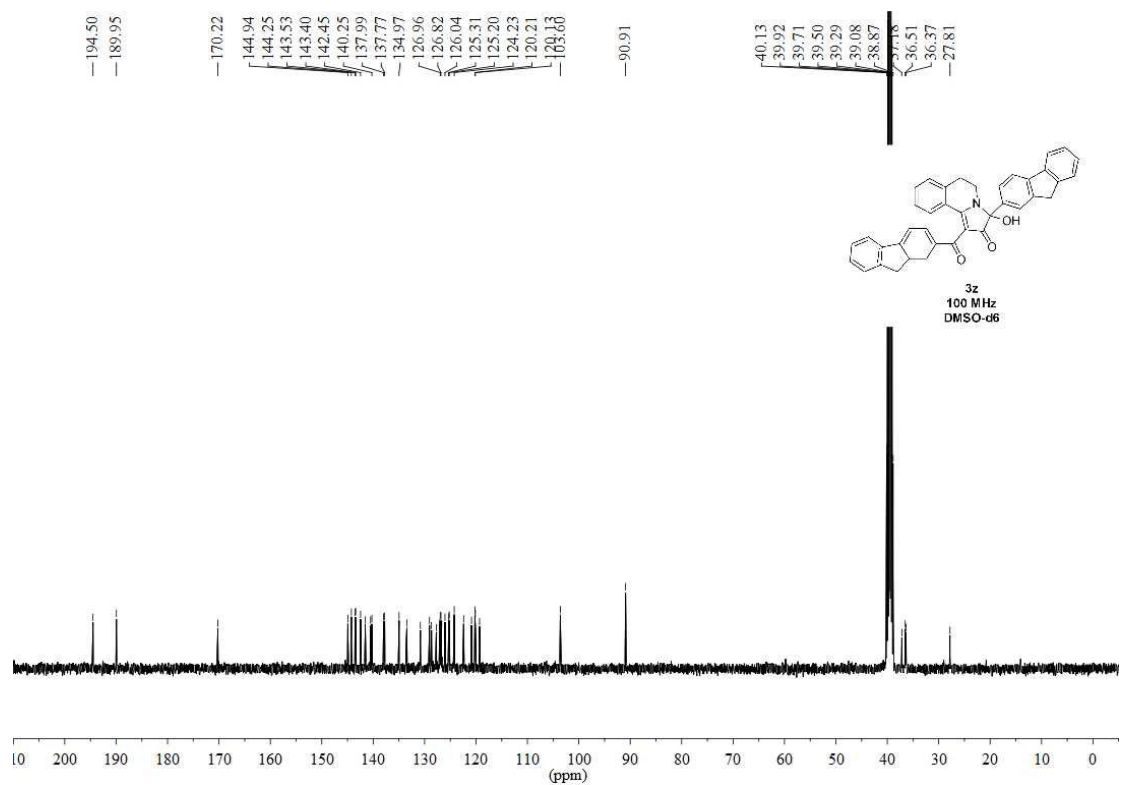

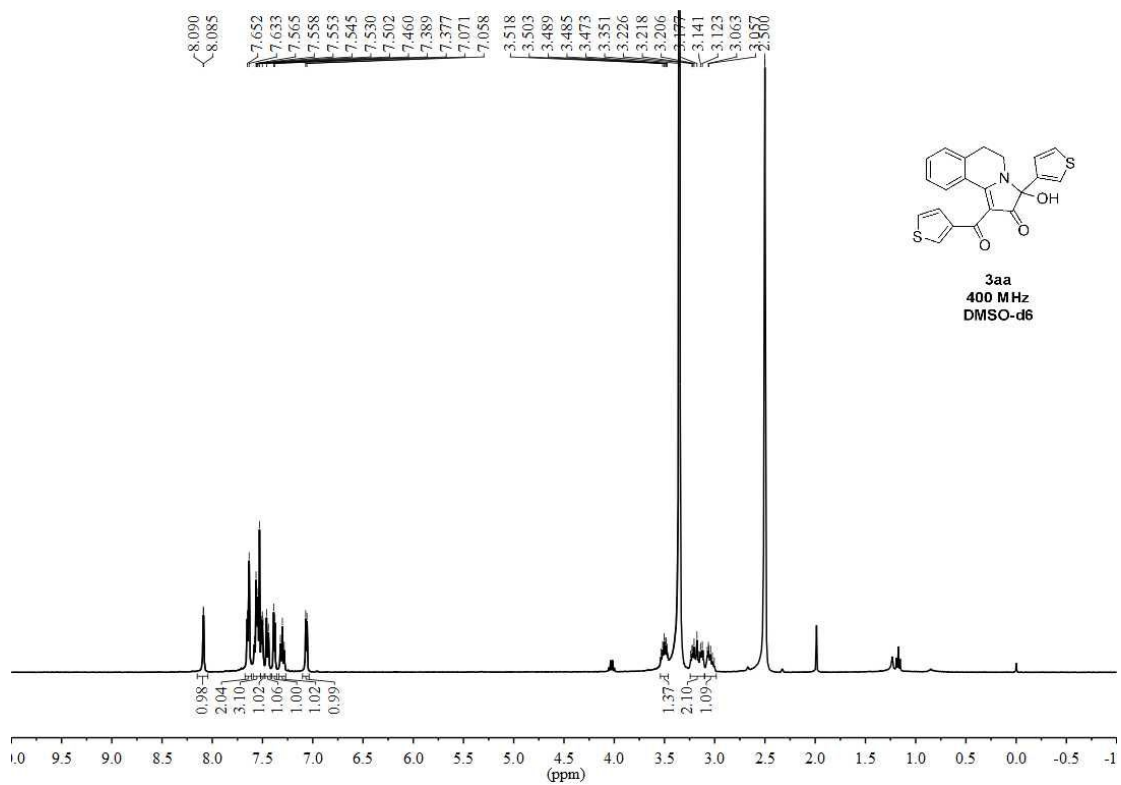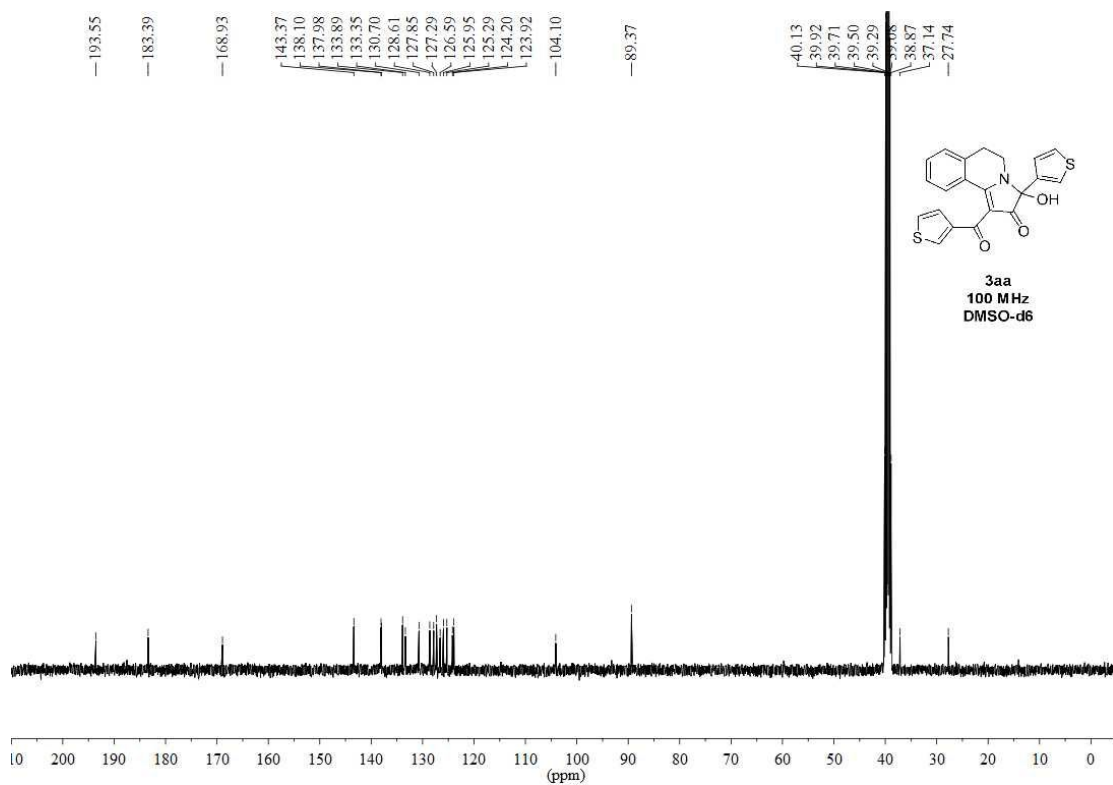

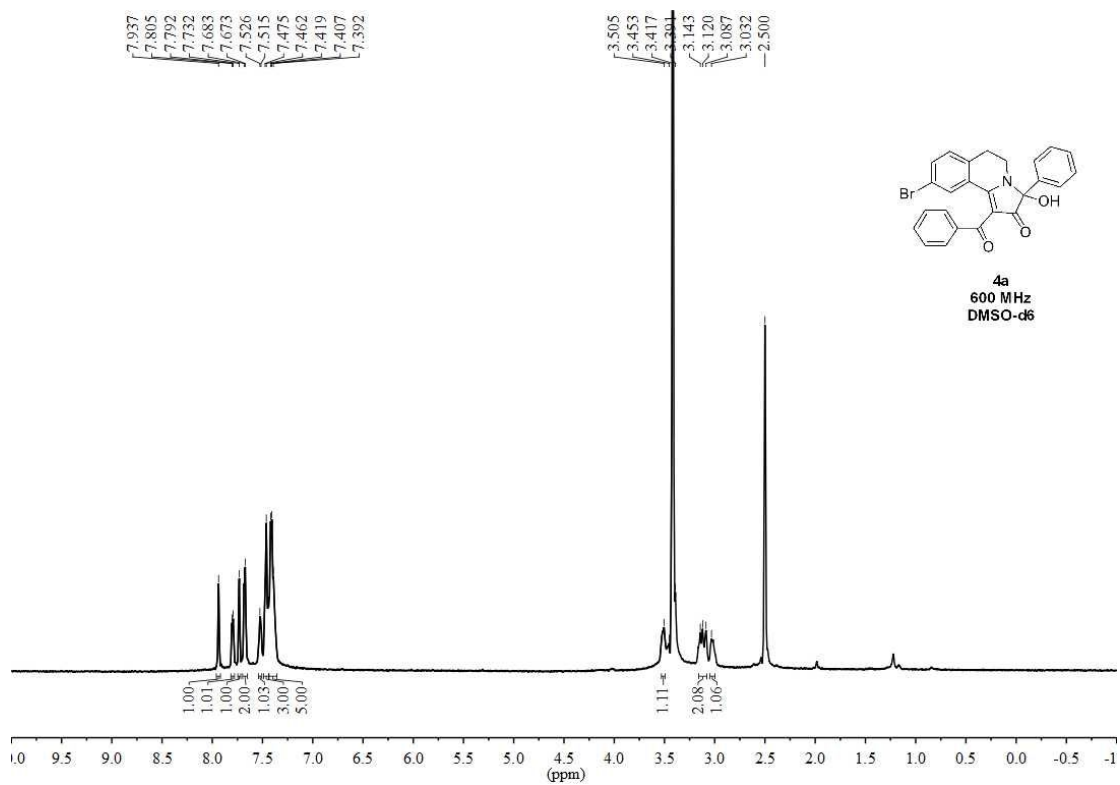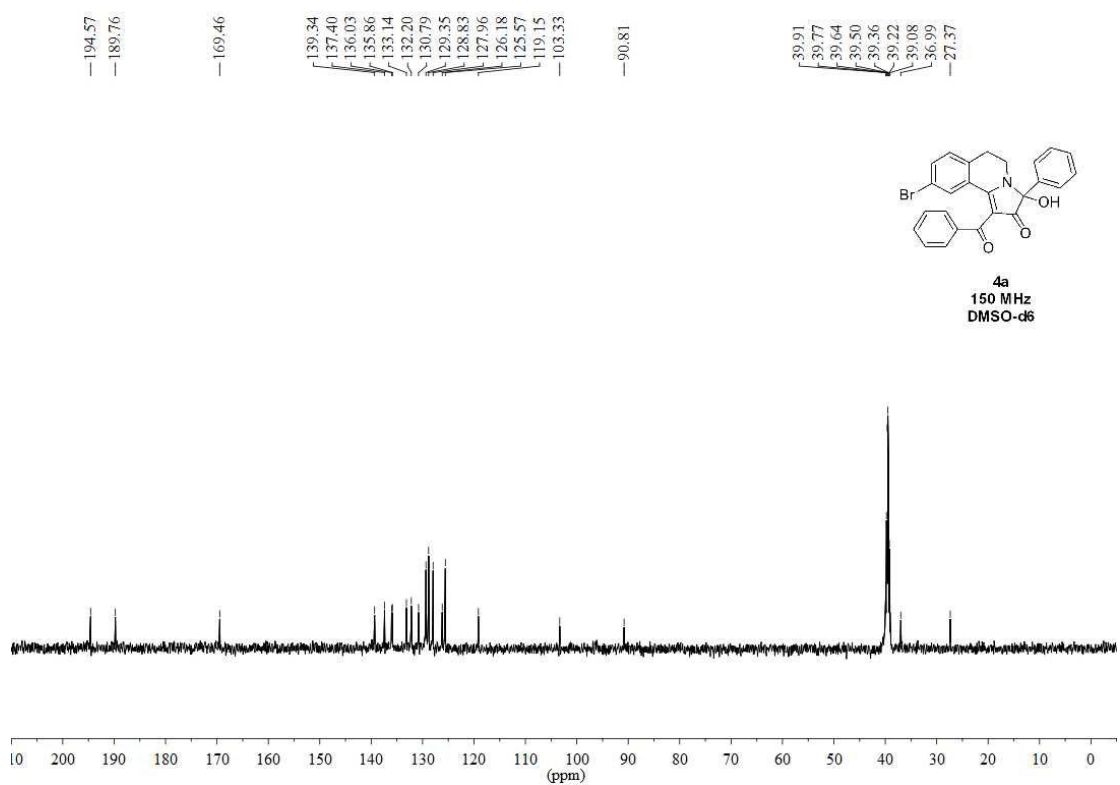



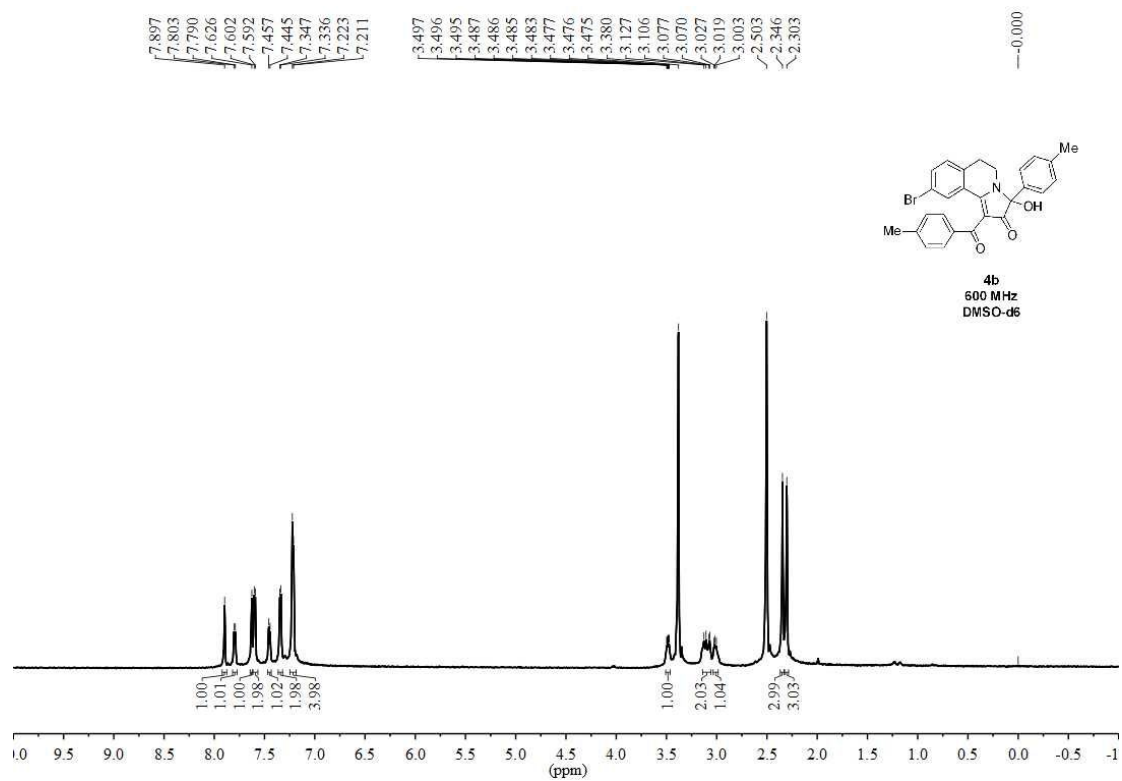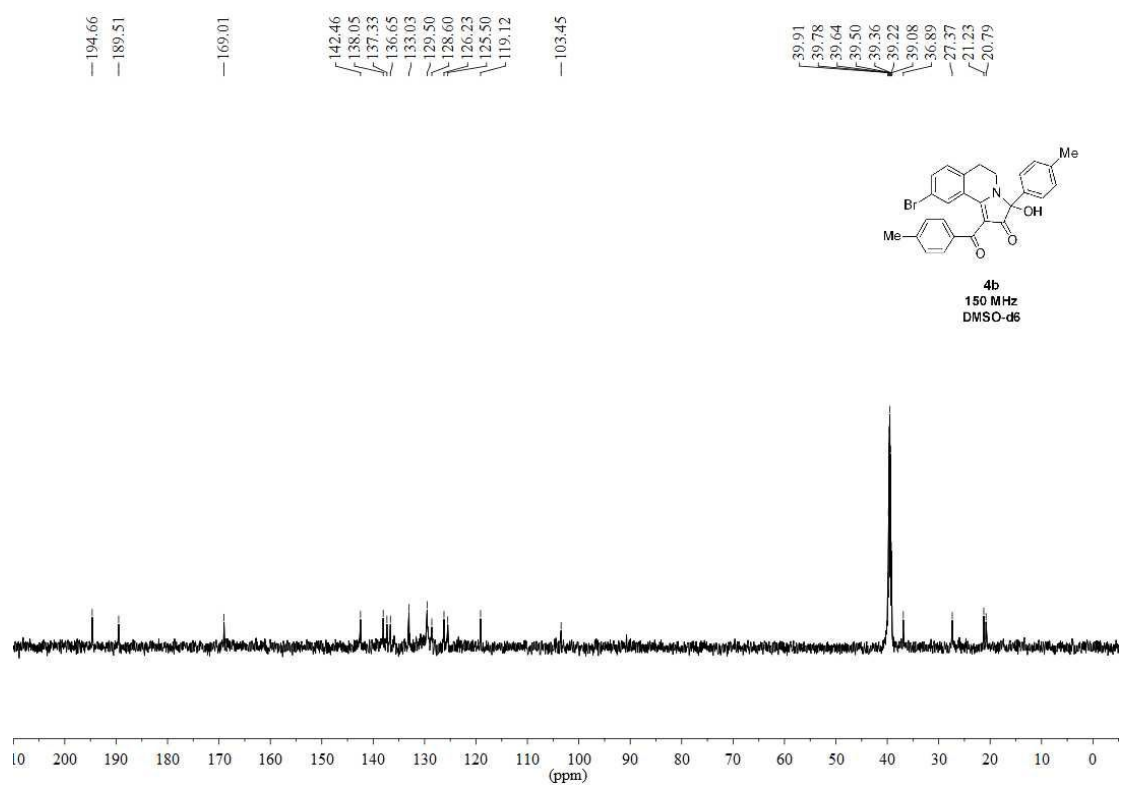

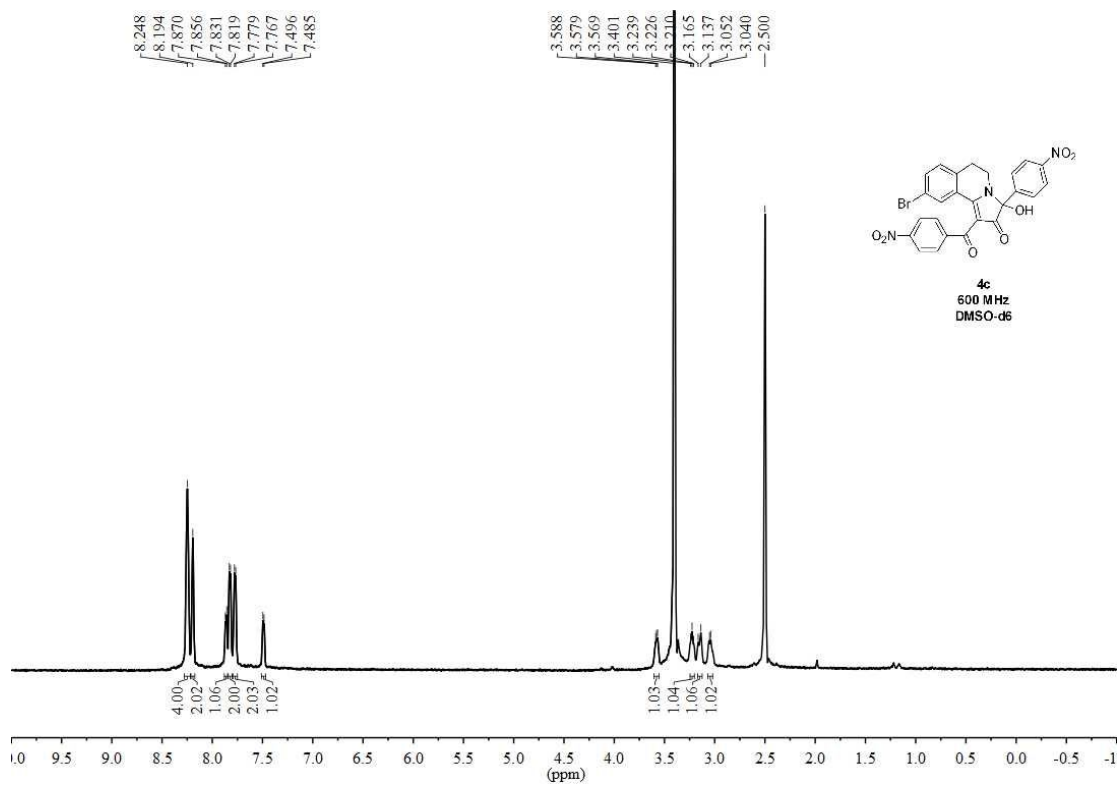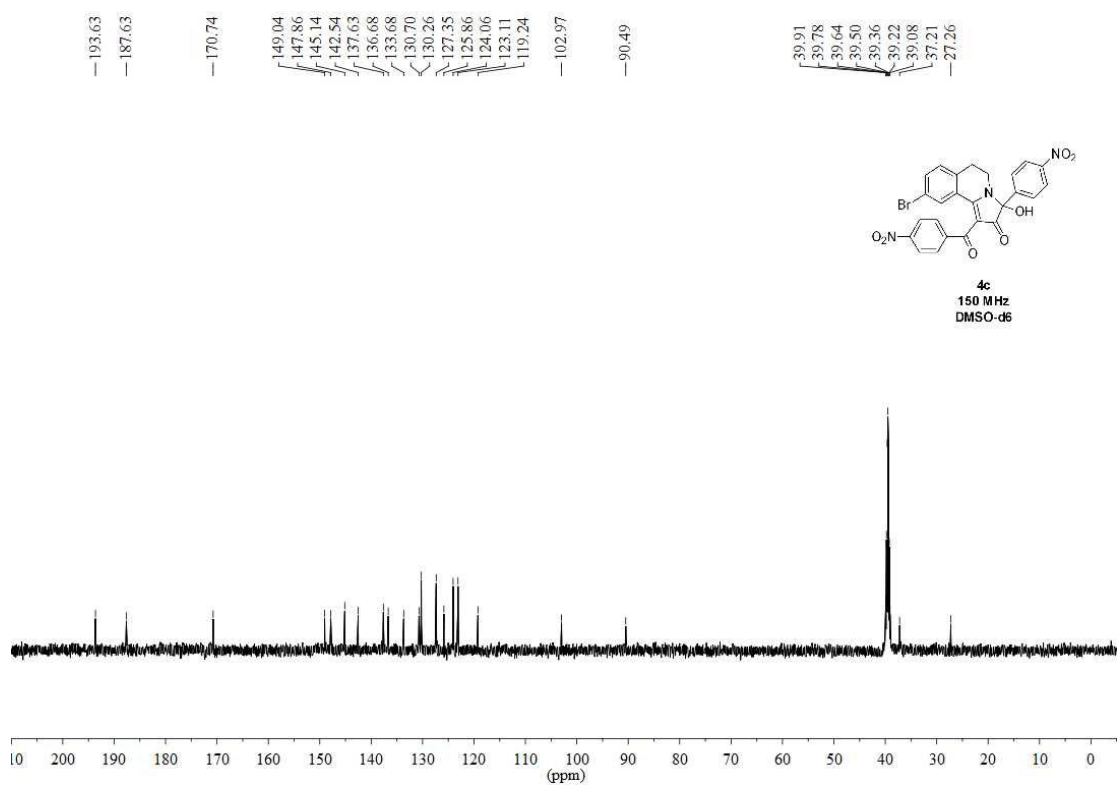

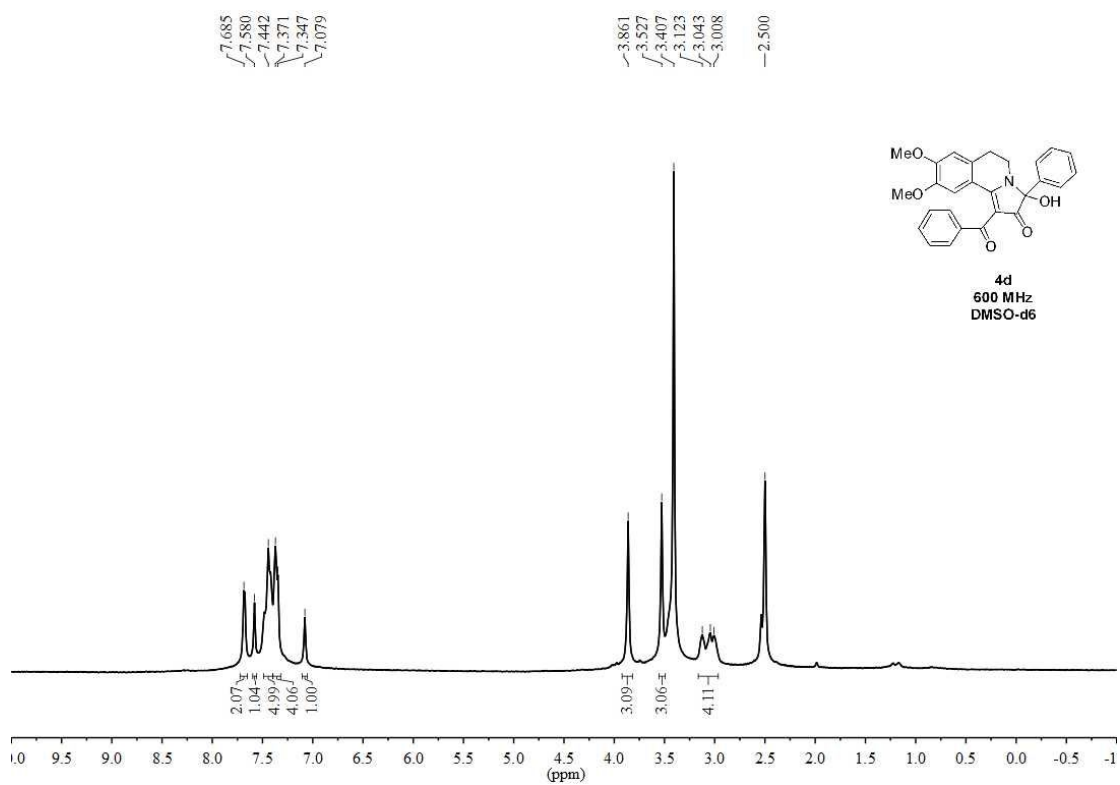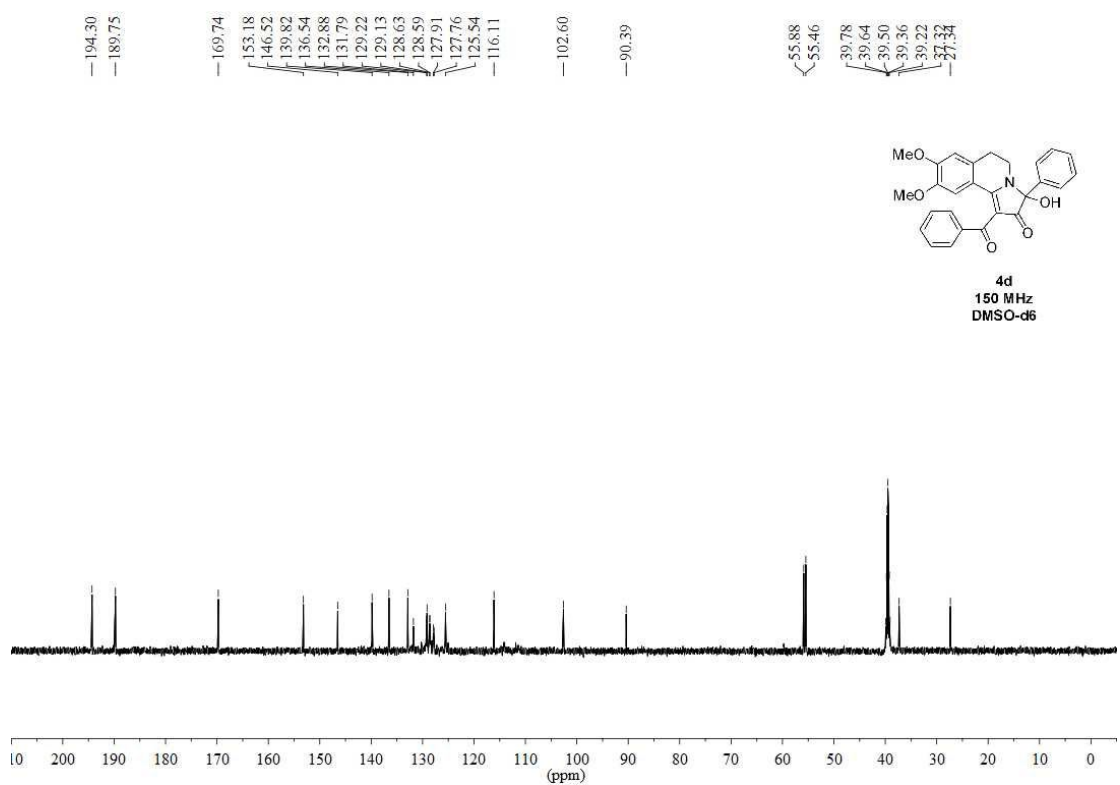

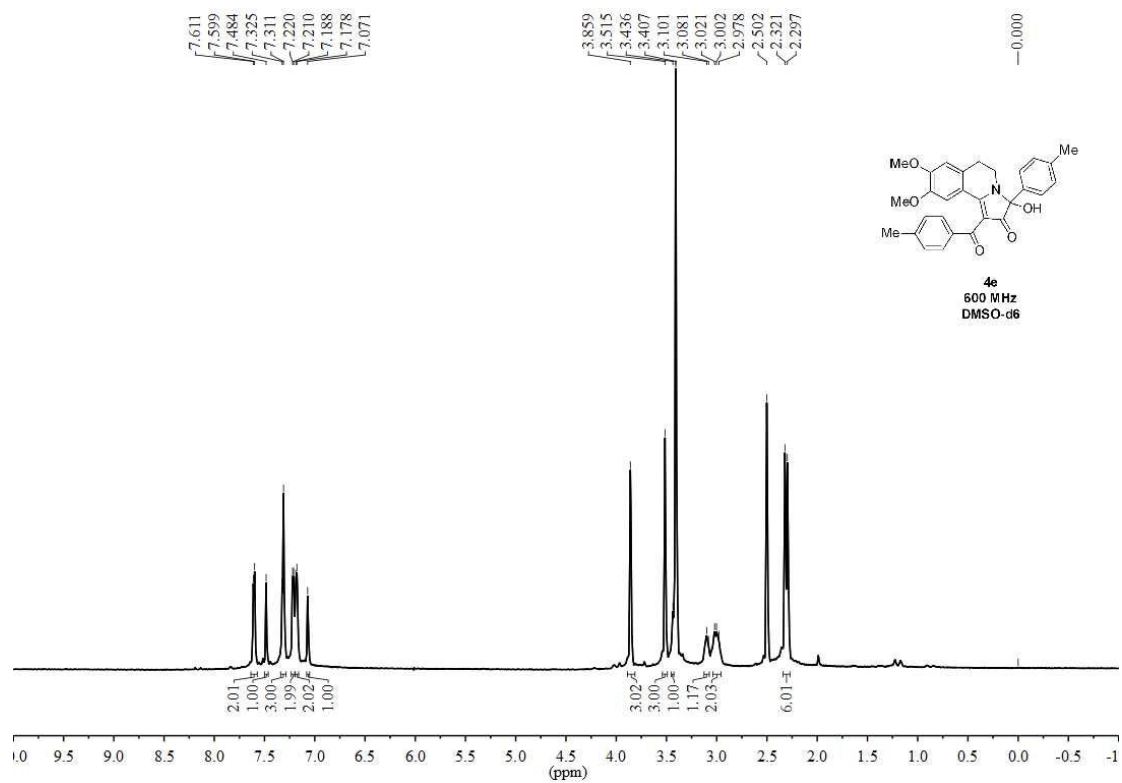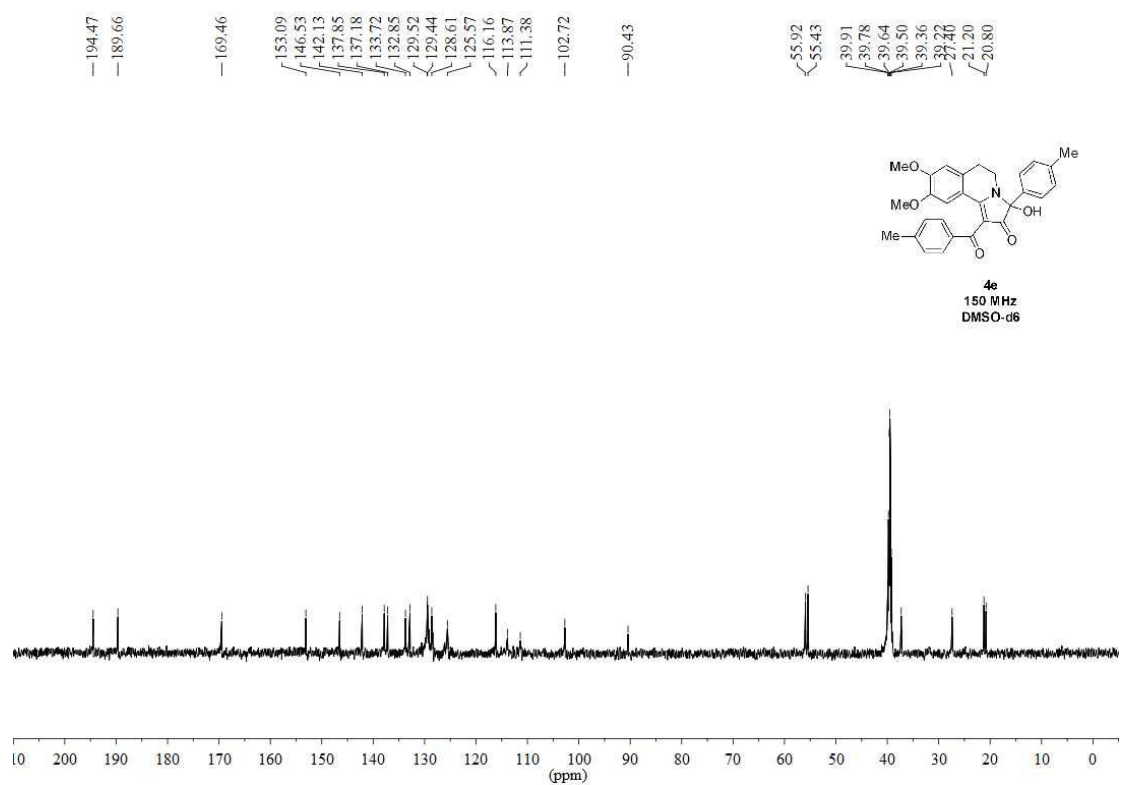

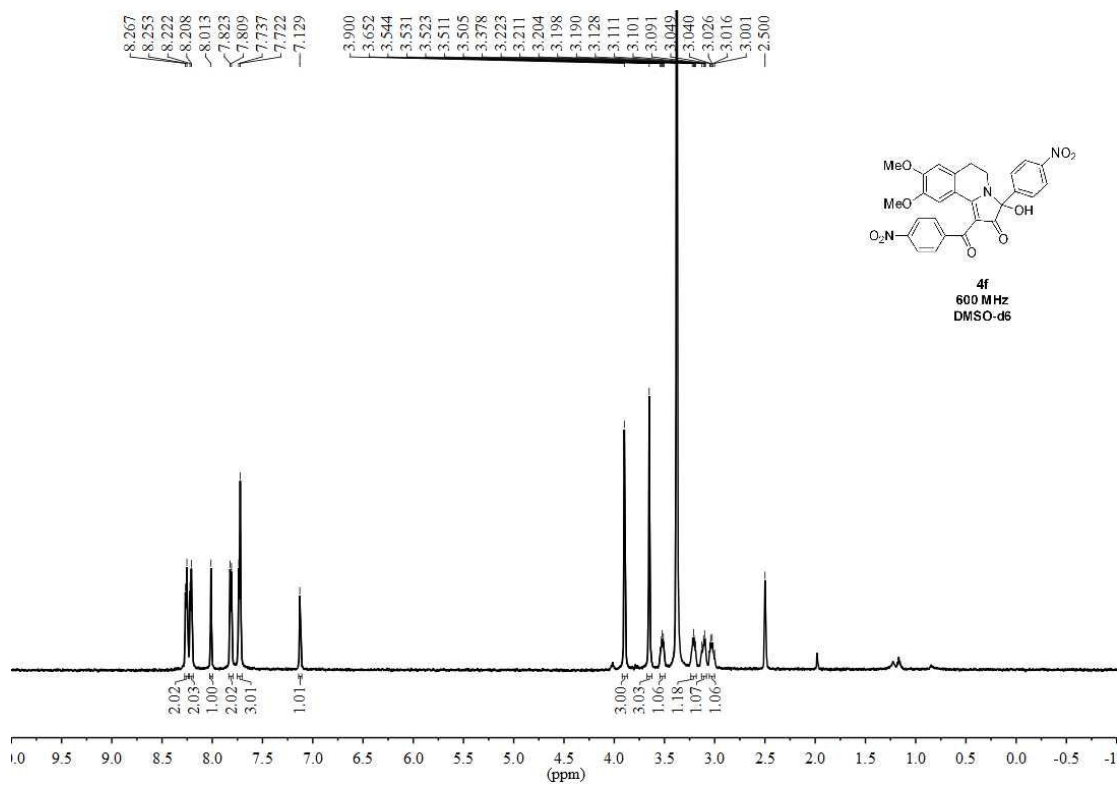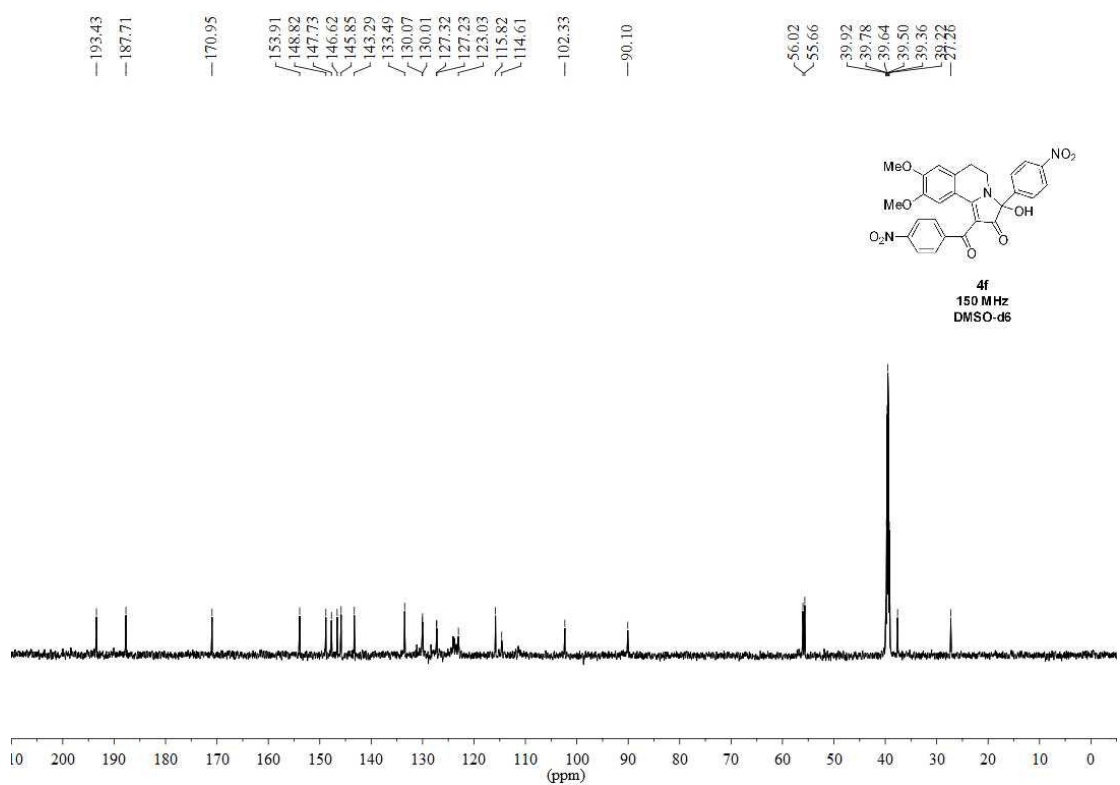

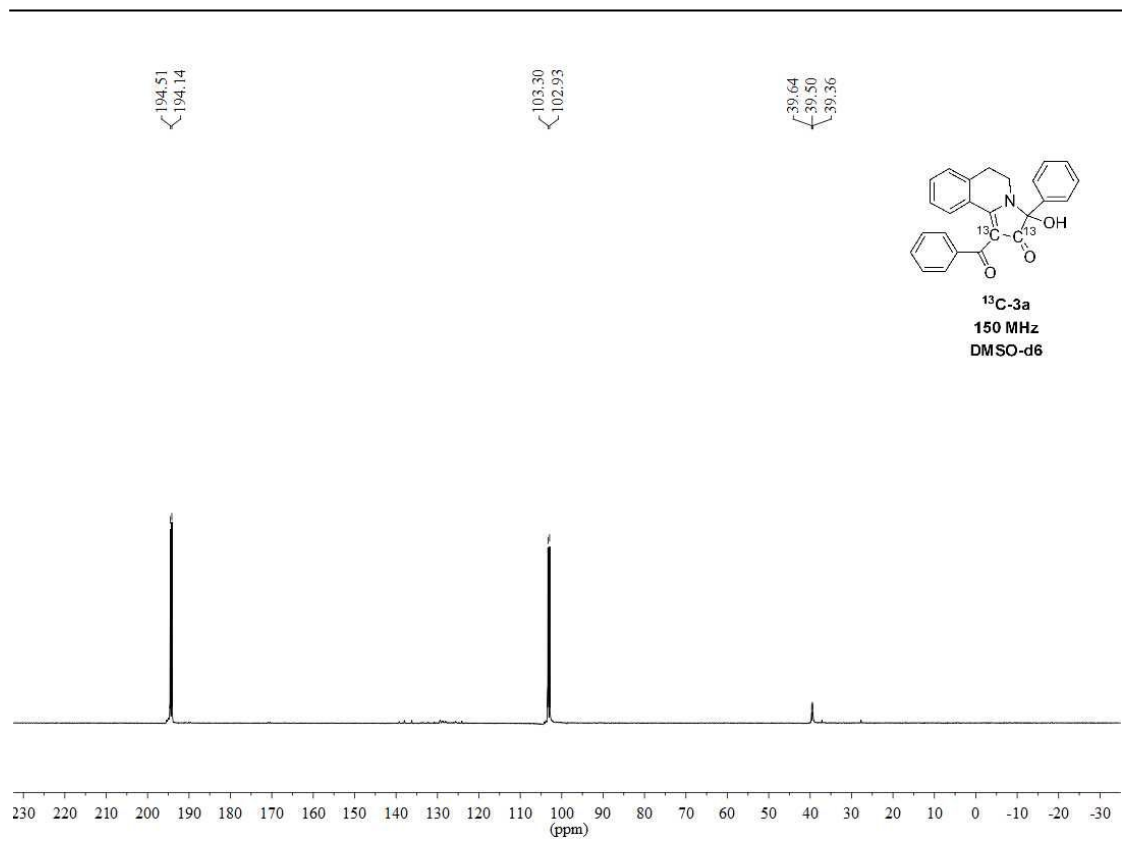

Supplement: Supplementary file 1 [file 34748059]
